# Supplementary material for: Cellular Stress Following Water Deprivation in the Model Legume Lotus japonicus
Source: Cells. 2012 Nov 13;1(4):1089–106. doi: 10.3390/cells1041089 (PMC3901144; doi:10.3390/cells1041089)
Supplement: Supplementary File 1 — Supplementary File (XLS, 4966 KB) [file cells-01-01089-s001.xls]

## Sheet: Lotus_drought_probe_PA_0.05_fil
		Limma coefficients	Limma FDR p values
Descriptions	probesets	Wad - Wa	Wad - Wa
Lotus japonicus similar to At5g46800: carnitine acylcarnitine translocase-like protein	BM0924.20_at	-0.432166	0.550927
Lotus japonicus similar to At5g46800: carnitine acylcarnitine translocase-like protein	BM0924.20_s_at	-0.704065	0.0546422
Lotus japonicus similar to At2g46230: unknown protein	BM0924.34_at	0.0759054	0.893274
Lotus japonicus similar to At4g16160: pore protein homolog	chr4.CM0429.5_at	4.56848	0.00449713
Lotus japonicus similar to At5g46800: carnitine acylcarnitine translocase-like protein	BM0924.35_x_at	-0.582061	0.108884
Lotus japonicus similar to At1g18530: hypothetical protein	BM0946.17_at	0.182122	0.739966
Lotus japonicus hypothetical protein	BM0946.20_x_at	0.0368384	0.784992
Lotus japonicus similar to At1g52690: unknown protein	Ljwgs_133863.1_at	4.52741	0.00376211
Lotus japonicus hypothetical protein	BM0946.8_at	0.0272206	0.906253
Lotus japonicus similar to At4g33210: unknown protein	BM0976.1_at	0.218556	0.788883
Lotus japonicus similar to At5g06760: late embryogenesis abundant protein LEA like	chr1.TM0221.11_at	4.24086	0.0026393
Lotus japonicus hypothetical protein	BM0976.13_at	-0.244352	0.603608
Lotus japonicus similar to At5g09300: branched-chain alpha keto-acid dehydrogenase E1 alpha subunit-like protein	Ljwgs_062789.1_at	4.16022	0.000271072
Lotus japonicus similar to Q9FUJ1: (Q9FUJ1) CYTOKININ OXIDASE	BM0976.3.2_at	0.41596	0.272024
Lotus japonicus similar to At1g02850: Similar to beta-glucosidases (At1g02850)	chr2.CM0056.64_at	4.0108	0.000588726
Lotus japonicus similar to Q9FUJ1: (Q9FUJ1) CYTOKININ OXIDASE	BM0976.4_at	0.392139	0.294631
Lotus japonicus similar to Q9M3H8: (Q9M3H8) PUTATIVE UDP-GLYCOSE (FRAGMENT)	BM0976.9_x_at	0.103368	0.712665
Lotus japonicus hypothetical protein	BM1214.18_at	0.0222293	0.972528
Lotus japonicus similar to At3g61130: unknown protein	BM1214.3_at	-0.0420988	0.776361
Lotus japonicus similar to At3g61130: unknown protein	BM1214.3_x_at	-0.121246	0.782627
Lotus japonicus similar to At1g49650: unknown protein	BM1271.13_at	0.467055	0.226273
Lotus japonicus similar to At3g48690: unknown protein	BM1271.17_at	0.0527616	0.986822
Lotus japonicus similar to At3g05970: AMP-binding protein	BM1271.2_at	0.0901269	0.874046
Lotus japonicus similar to At2g25625: unknown protein	Ljwgs_013141.2_at	3.93788	0.0011005
Lotus japonicus similar to At5g66780: putative protein	Ljwgs_053770.1_at	3.8203	0.0436424
Lotus japonicus similar to At3g05990: unknown protein	BM1271.5.1_at	0.271588	0.422113
Lotus japonicus similar to At5g19330: putative protein	BM1271.6_at	0.205165	0.51897
Lotus japonicus similar to At1g19190: unknown protein	BM1271.9_s_at	-0.014148	0.985232
Lotus japonicus similar to At3g51970: wax synthase-like protein	BM1386.1_at	-0.0213199	0.841618
Lotus japonicus similar to At4g22290: putative protein	BM1386.11.1_at	-0.191427	0.242382
Lotus japonicus similar to At4g22290: putative protein	BM1386.11_at	-0.327174	0.366935
Lotus japonicus similar to At4g22330: Acyl-CoA independent ceramide synthase (AtCES1)	BM1386.13_at	-0.358844	0.413974
Lotus japonicus similar to At2g32300: uclacyanin I - like predicted GPI-anchored protein	BM1386.15_at	-0.745074	0.257497
Lotus japonicus similar to At4g12610: putative protein	BM1386.18.1_at	0.101537	0.860847
Lotus japonicus similar to GTX6_SOYBN: (P32110) PROBABLE GLUTATHIONE S-TRANSFERASE (EC	Ljwgs_074013.2_s_at	3.70701	0.00208498
Lotus japonicus similar to At1g12050: fumarylacetoacetate hydrolase-like protein	BM1386.19_at	0.232614	0.143184
Lotus japonicus similar to At4g22270: unknown protein	BM1386.21.1_at	1.1116	0.119487
Lotus japonicus similar to At3g20300: unknown protein	BM1386.21_s_at	0.917284	0.215597
Lotus japonicus similar to At3g20300: unknown protein	BM1386.21_x_at	1.08635	0.124585
Lotus japonicus similar to At3g20300: unknown protein	BM1386.24_at	0.0996836	0.70407
Lotus japonicus similar to O64406: (O64406) ENVELOPE-LIKE PROTEIN (FRAGMENT)	BM1386.27_x_at	-0.113381	0.873226
Lotus japonicus similar to O65373: (O65373) F12F1.7	BM1386.3_at	-0.00678049	0.992025
Lotus japonicus similar to At1g12030: hypothetical protein	BM1386.30_at	-0.152304	0.913072
Lotus japonicus similar to At4g22320: unknown protein	BM1386.32_at	-0.747139	0.101682
Lotus japonicus similar to At4g22310: unknown protein	BM1386.33_at	-0.232242	0.215395
Lotus japonicus hypothetical protein	BM1386.34.1_at	0.264038	0.85168
Lotus japonicus similar to At3g25070: unknown protein	BM1386.34_at	-0.00394	0.995539
Lotus japonicus similar to At1g62400: hypothetical protein	BM1386.36.2_at	0.847659	0.282713
Lotus japonicus similar to At1g62400: hypothetical protein	BM1386.36_at	0.369665	0.329837
Lotus japonicus similar to At1g12020: unknown protein	BM1386.38_at	0.302072	0.276268
Lotus japonicus similar to At4g22290: putative protein	BM1386.4_at	0.136597	0.861336
Lotus japonicus similar to At4g05530: unknown protein	BM1386.7.1_at	-0.27059	0.0645975
Lotus japonicus similar to At4g05530: unknown protein	BM1386.7_at	-0.165717	0.402942
Lotus japonicus similar to At1g12030: hypothetical protein	BM1386.8.1_at	-0.119695	0.454251
Lotus japonicus similar to At3g04070: NAM-like protein (no apical meristem)	chr1.CM0104.32_at	3.69855	0.00188021
Lotus japonicus similar to Q9M548: (Q9M548) MODIFICATION METHYLASE (EC 2.1.1.73) (CYTOS	BM1551.1_at	-0.214749	0.545367
Lotus japonicus similar to At1g60420: unknown protein	Ljwgs_026189.1_at	3.65906	0.00106485
Lotus japonicus similar to Q9AXC3: (Q9AXC3) HYPOTHETICAL 164.8 KDA PROTEIN	BM1551.17.1_x_at	-0.00689753	0.987635
Lotus japonicus hypothetical protein	BM1551.3.1_at	-0.00411958	0.99718
Lotus japonicus similar to At5g03740: histone deacetylase -like protein	BM1551.4_at	-0.742101	0.135799
Lotus japonicus similar to At5g22750: putative protein	BM1551.8_at	-0.0430989	0.694834
Lotus japonicus similar to At3g56230: putative protein	BM1625.16_at	0.0195706	0.987229
Lotus japonicus similar to At2g27020: 20S proteasome subunit C8 (PAG1 PRC8_ARATH)	BM1625.22_at	-0.126921	0.536055
Lotus japonicus similar to PSA3_SPIOL: (O24362) PROTEASOME SUBUNIT ALPHA TYPE 3 (EC 3.4	BM1625.25_at	-0.281849	0.197164
Lotus japonicus hypothetical protein	BM1625.3_at	0.000351968	0.999999
Lotus japonicus similar to O64406: (O64406) ENVELOPE-LIKE PROTEIN (FRAGMENT)	BM1625.7_x_at	0.0659255	0.822196
Lotus japonicus similar to At3g29460: hypothetical protein	BM1625.8_at	0.0477005	0.891431
Lotus japonicus similar to At2g40460: putative PTR2 family peptide transporter	BM1625.9_at	1.10393	0.0802796
Lotus japonicus similar to At5g20830: sucrose-UDP glucosyltransferase	BM1684.10_at	-0.234588	0.633506
Lotus japonicus similar to At3g43210: kinesin -like protein	BM1684.13_at	0.0976397	0.922925
Lotus japonicus similar to Q9F713: (Q9F713) ORF122 (FRAGMENT)	BM1684.4.1_x_at	-0.260265	0.533653
Lotus japonicus similar to At2g03140: similar to late embryogenesis abundant proteins	BM1684.6_at	0.6535	0.310301
Lotus japonicus similar to O82468: (O82468) PROTEIN PHOSPHATASE-2C	chr4.CM0617.35_at	3.61907	0.00118596
Lotus japonicus similar to At3g04910: putative mitogen activated protein kinase kinase	BM1702.12_at	-0.0212583	0.975188
Lotus japonicus similar to At2g18630: unknown protein	BM1702.16_at	0.211988	0.588066
Lotus japonicus similar to At3g04880: DNA-damage-repair toleration protein DRT102	BM1702.17_at	0.446945	0.24084
Lotus japonicus similar to At1g54490: unknown protein	BM1702.3_at	0.362661	0.310456
Lotus japonicus similar to At1g54500: unknown protein	BM1702.4_at	-0.470076	0.061047
Lotus japonicus similar to At5g28040: unknown protein	BM1702.6_s_at	0.653038	0.142535
Lotus japonicus similar to At1g54520: unknown protein	BM1702.9_at	-0.215173	0.519738
Lotus japonicus similar to At2g47490: mitochondrial carrier like protein	BM1736.1_at	-0.183104	0.355643
Lotus japonicus similar to At1g02780: ribosomal protein like (L19)	BM1736.11.1_at	0.537236	0.238017
Lotus japonicus similar to At2g47500: kinesin heavy chain like protein	BM1736.2_at	0.0139994	0.992025
Lotus japonicus similar to At3g23880: unknown protein	BM1736.3_at	-0.0547247	0.963654
Lotus japonicus similar to At2g47500: kinesin heavy chain like protein	BM1736.4.1_at	-0.172626	0.725709
Lotus japonicus similar to At2g47500: kinesin heavy chain like protein	BM1736.4_at	-0.232483	0.607226
Lotus japonicus nodule-enhanced protein phosphatase type 2C (NPP2C1) mRNA, complete cds	gi4336433_at	3.53312	0.023536
Lotus japonicus similar to At2g40940: ethylene response sensor (ERS)	BM1736.6_at	-0.109568	0.816496
ENOD40-2 protein [Lotus japonicus]	TC8247_s_at	3.52509	0.00339412
Lotus japonicus similar to At2g30580: C3HC4 zinc finger like protein	chr1.BM1697.16_at	-0.836796	0.28855
Lotus japonicus similar to At2g30580: C3HC4 zinc finger like protein	chr1.BM1697.16_s_at	-0.235258	0.44623
Lotus japonicus similar to At1g67230: unknown protein	chr1.BM1697.18_at	-0.479865	0.156143
Lotus japonicus similar to At1g78660: unknown protein	chr1.BM1732.0.1_at	0.00553504	0.995783
Lotus japonicus similar to At1g78660: unknown protein	chr1.BM1732.0.1_x_at	0.0211086	0.944002
Lotus japonicus similar to At5g01450: putative protein	chr1.BM1732.13.2_at	0.166706	0.577116
Lotus japonicus similar to At5g27430: signal peptidase	chr1.BM1732.16.1_at	0.00267597	0.99924
Lotus japonicus similar to Q9AYM5: (Q9AYM5) CPRD49 PROTEIN	chr1.BM1732.18_at	-0.533773	0.483945
Lotus japonicus similar to At5g05600: leucoanthocyanidin dioxygenase-like protein	chr1.BM1732.2_at	0.126708	0.942838
Lotus japonicus similar to At3g11200: putative nucleic acid binding protein	chr1.BM1732.5_at	-0.0727343	0.896819
Lotus japonicus similar to At5g01390: heat shock protein 40-like	chr1.BM1732.8_at	-0.051196	0.945956
Lotus japonicus similar to At1g60420: unknown protein	Ljwgs_012786.1_at	3.52346	0.00294245
Lotus japonicus similar to At2g30280: unknown protein	chr1.CM0001.1.2_at	0.393317	0.105652
Lotus japonicus similar to At2g30280: unknown protein	chr1.CM0001.1_at	0.075948	0.9666
Lotus japonicus similar to At2g30280: unknown protein	chr1.CM0001.1_s_at	0.00327291	0.9997
Lotus japonicus similar to At2g30280: unknown protein	chr1.CM0001.1_x_at	-0.128872	0.781576
Lotus japonicus similar to At2g30280: unknown protein	chr1.CM0001.14_at	0.359548	0.227865
Lotus japonicus similar to At5g40470: unknown protein	chr1.CM0001.16_at	0.002106	0.999999
Lotus japonicus similar to At5g40500: unknown protein	chr1.CM0001.22_at	0.077018	0.853299
Lotus japonicus similar to At5g40530: unknown protein	chr1.CM0001.28.1_at	0.0330367	0.953472
Lotus japonicus hypothetical protein	chr1.CM0001.28_at	-0.116074	0.767821
Lotus japonicus similar to At2g30280: unknown protein	chr1.CM0001.3.2_at	0.275806	0.189041
Lotus japonicus similar to At3g09930: putative lipase acylhydrolase	chr1.CM0001.33.1_at	-0.00320746	0.997788
Lotus japonicus similar to KPK1_PHAVU: (P15792) PROTEIN KINASE PVPK-1 (EC 2.7.1.-)	chr1.CM0001.33_at	0.235569	0.297028
Lotus japonicus similar to At5g14480: putative protein	chr1.CM0001.36_at	-0.00255629	0.999999
Lotus japonicus similar to Q41419: (Q41419) SUCROLYTIC ENZYME FERREDOXIN HOMOLOG	chr1.CM0001.37.1_at	0.179674	0.627156
Lotus japonicus similar to At5g40510: sucrose cleavage protein -like	chr1.CM0001.37_at	0.271674	0.253551
Lotus japonicus similar to At2g24230: putative receptor-like protein kinase	chr1.CM0001.45_x_at	-0.149296	0.808046
Lotus japonicus similar to At1g52150: unknown protein	chr1.CM0001.48_s_at	-0.212815	0.860011
Lotus japonicus similar to At3g16460: putative jasmonate inducible protein (MDC8.9 AT3g16460)	chr2.CM0310.10_at	3.50872	0.000479859
Lotus japonicus similar to Q9LTY4: (Q9LTY4) GB|AAD31054.1	chr1.CM0001.53_at	0.00402411	0.999999
Lotus japonicus similar to At5g40550: putative protein	chr1.CM0001.56_at	0.4011	0.202378
Lotus japonicus similar to At5g14450: early nodule-specific protein - like	chr1.CM0001.57_at	-0.615502	0.151501
Lotus japonicus similar to At4g33150: lysine-ketoglutarate reductase saccharopine dehydrogenase (LKR SDH)	chr4.CM0343.10_at	3.5081	0.00155395
Lotus japonicus similar to At5g14450: early nodule-specific protein - like	chr1.CM0001.60_at	-1.0818	0.0835373
Lotus japonicus similar to Q9FDY1: (Q9FDY1) SEED MATURATION PROTEIN LEA 4	Ljwgs_056638.1_s_at	3.49494	0.00726559
Lotus japonicus similar to At2g47770: unknown protein	Ljwgs_005308.2_at	3.45032	0.00400656
Lotus japonicus similar to At1g74040: 2-isopropylmalate synthase like protein	chr1.CM0001.70_at	-0.0070498	0.999999
Lotus japonicus similar to LEU1_SOYBN: (Q39891) PROBABLE 2-ISOPROPYLMALATE SYNTHASE (EC	chr1.CM0001.71_at	-0.0598442	0.97782
Lotus japonicus similar to At4g17030: allergen like protein	Ljwgs_059850.1_at	3.44462	0.0382608
Lotus japonicus similar to At1g70610: transporter associated with antigen processing-like protein (TAP1)	chr1.CM0001.8_at	-0.0113947	0.999524
Lotus japonicus similar to TG21_TOBAC: (O24160) TGACG-SEQUENCE SPECIFIC DNA-BINDING PRO	chr1.CM0009.11.1_at	0.275226	0.250355
Lotus japonicus similar to At1g68060: unknown protein	chr1.CM0009.13.1_at	-0.00461859	0.993545
Lotus japonicus similar to At2g01750: putative myosin heavy chain-like protein	chr1.CM0009.13_at	-0.0136495	0.980091
Lotus japonicus similar to At2g41200: unknown protein	chr1.CM0009.20_at	-0.531202	0.29752
Lotus japonicus similar to At5g04140: ferredoxin-dependent glutamate synthase	chr1.CM0009.24_at	-0.137976	0.719616
Lotus japonicus hypothetical protein	chr1.CM0009.28.1_at	-0.111967	0.693271
Lotus japonicus similar to At3g10210: unknown protein	chr1.CM0009.34_at	0.0636989	0.818539
Lotus japonicus similar to At2g25625: unknown protein	Ljwgs_013141.2_x_at	3.42867	0.000876871
Lotus japonicus similar to At1g09970: leucine-rich repeat receptor-like kinase At1g09970	chr1.CM0009.43_at	0.488087	0.0648779
Lotus japonicus similar to At2g14260: proline iminopeptidase	chr1.CM0009.44_at	0.285265	0.118169
Lotus japonicus similar to At1g02205: CER1 protein	chr1.CM0009.46_at	-1.73946	0.227176
Lotus japonicus similar to At1g52820: oxidoreductase-like protein	Ljwgs_087854.1_s_at	3.34589	0.00581268
Lotus japonicus similar to At4g18590: pollen-specific protein - like	chr1.CM0010.11_at	-0.153842	0.918282
Lotus japonicus similar to At4g18590: pollen-specific protein - like	chr1.CM0010.11_x_at	-0.405484	0.56251
Lotus japonicus similar to At3g52660: putative RNA binding protein	chr1.CM0010.13_s_at	-0.533098	0.293529
Lotus japonicus similar to At3g52660: putative RNA binding protein	chr1.CM0010.15_at	0.254713	0.15683
Lotus japonicus similar to At3g52660: putative RNA binding protein	chr1.CM0010.15_s_at	-0.174908	0.408698
Lotus japonicus similar to Q9SRX8: (Q9SRX8) F22D16.15 PROTEIN	chr2.CM0056.59.1_at	3.2972	0.000190046
Lotus japonicus similar to At5g03870: putative protein	chr1.CM0010.18_at	-2.20694	0.135632
Lotus japonicus hypothetical protein	chr1.CM0010.19_at	0.0245912	0.816789
Lotus japonicus similar to At5g33360: putative protein	chr1.CM0010.2.1_at	0.0173781	0.967532
Lotus japonicus similar to At3g10120: unknown protein	chr1.CM0010.20_at	1.074	0.0949462
Lotus japonicus similar to Q9ZPL9: (Q9ZPL9) NODULE-ENHANCED PROTEIN PHOSPHATASE TYPE 2C	Ljwgs_010070.2_s_at	3.28868	0.0142229
Lotus japonicus similar to At5g03905: unknown protein	chr1.CM0010.27_at	-0.181879	0.663624
Lotus japonicus similar to At2g26060: unknown protein	chr1.CM0010.28_at	0.147099	0.612608
Lotus japonicus similar to At3g52740: putative protein	chr1.CM0010.29_at	0.257302	0.872872
Lotus japonicus similar to At4g17030: allergen like protein	Ljwgs_012501.1_at	3.26818	0.00514639
Lotus japonicus similar to At2g16710: putative HesB-like protein	chr1.CM0010.31_at	0.318592	0.648561
Lotus japonicus similar to At2g36270: bZip transcription factor AtbZip39	chr1.CM0010.32_at	-0.00804809	0.998323
Lotus japonicus similar to Q9XGS4: (Q9XGS4) CEN-LIKE PROTEIN FDR1	chr1.CM0010.35_s_at	0.110225	0.668285
Lotus japonicus similar to At3g52660: putative RNA binding protein	chr1.CM0010.6.1_at	-0.106947	0.598047
Lotus japonicus similar to At5g40820: AtRAD3 (dbj|BAA92828.1)	chr1.CM0010.6.2_at	0.0717482	0.581664
Lotus japonicus similar to O82458: (O82458) RAC GTPASE ACTIVATING PROTEIN 1	chr1.CM0010.8_s_at	0.590254	0.0983696
Lotus japonicus similar to At5g03940: signal recognition particle 54CP protein precursor	chr1.CM0010.9_at	-0.644807	0.275333
Lotus japonicus similar to At5g03430: unknown protein	chr1.CM0012.1_at	0.265033	0.363878
Lotus japonicus hypothetical protein	chr1.CM0012.14.1_s_at	-0.00971071	0.999999
Lotus japonicus similar to At4g27410: unknown protein	Ljwgs_036303.1_at	3.26414	0.000495996
Lotus japonicus similar to At5g03450: unknown protein	chr1.CM0012.19.1_s_at	0.0524973	0.975701
Lotus japonicus similar to At2g26670: heme oxygenase 1 (HO1)	chr1.CM0012.19_at	0.760995	0.0723637
Lotus japonicus similar to At1g20925: putative protein	TM0933.19_at	3.25008	0.00010154
Lotus japonicus similar to At2g36870: putative xyloglucan endo-transglycosylase	chr1.CM0012.2_s_at	1.0838	0.284424
Lotus japonicus similar to At5g03450: unknown protein	chr1.CM0012.22_s_at	0.000578292	0.999999
Lotus japonicus similar to At5g41590: putative protein	chr1.CM0012.25.1_s_at	0.42787	0.690119
Lotus japonicus similar to At2g39210: nodulin-like protein	chr1.CM0012.32_at	0.12207	0.390174
Lotus japonicus similar to At4g31380: hypothetical protein	Ljwgs_046847.1_at	3.23344	0.000219825
Lotus japonicus similar to At5g52300: low-temperature-induced 65 kD protein (sp|Q04980)	chr5.CM0148.30_at	3.21036	0.000331748
Lotus japonicus similar to At2g39210: nodulin-like protein	chr1.CM0012.39_at	0.241583	0.804707
Lotus japonicus similar to At5g03450: unknown protein	chr1.CM0012.4_s_at	0.211938	0.383855
Lotus japonicus similar to At1g49490: hypothetical protein	chr1.CM0012.43_x_at	-0.103484	0.991926
Lotus japonicus similar to At1g62480: unknown protein	chr4.CM0288.54_s_at	3.20866	0.00698956
Lotus japonicus similar to At1g18880: unknown protein	chr4.CM0170.16_at	3.17289	8.91434e-05
Lotus japonicus similar to At2g22570: unknown protein	chr4.CM0100.16_at	3.16263	0.000190877
Lotus japonicus similar to Q40206: (Q40206) RAB1X	chr1.CM0012.57_s_at	0.342813	0.259781
Lotus japonicus similar to At3g09920: putative phosphatidylinositol-4-phosphate 5-kinase	chr1.CM0012.58_at	0.0233025	0.98672
Lotus japonicus similar to At2g36870: putative xyloglucan endo-transglycosylase	chr1.CM0012.6.1_s_at	1.05051	0.40921
Lotus japonicus similar to At3g21540: WD repeat like protein	chr1.CM0012.60_at	0.243666	0.647397
Lotus japonicus similar to At2g36810: unknown protein	chr1.CM0012.63_at	0.789765	0.178614
Lotus corniculatus var. japonicus glutathione synthetase mRNA, complete cds	gi37222543_at	3.14356	0.0118952
Lotus japonicus similar to Q9FSG7: (Q9FSG7) THAUMATIN-LIKE PROTEIN PRECURSOR	chr1.CM0012.67_at	3.95693	0.0534353
Lotus japonicus similar to At4g22920: unknown protein	chr4.CM0126.95_at	3.09887	0.00161314
Lotus japonicus similar to At3g04070: NAM-like protein (no apical meristem)	chr1.CM0104.32_s_at	3.08295	0.000476321
Lotus japonicus similar to At2g36810: unknown protein	chr1.CM0012.71_at	0.564353	0.132267
Lotus japonicus similar to At2g36810: unknown protein	chr1.CM0012.75_at	0.426868	0.273975
Lotus japonicus similar to At2g36800: putative glucosyl transferase	chr1.CM0012.80_at	0.355133	0.732036
Lotus japonicus similar to At5g16280: putative protein	chr1.CM0016.11.1_s_at	-0.338616	0.317872
Lotus japonicus similar to Q9AXP1: (Q9AXP1) ACID INVERTASE (FRAGMENT)	Ljwgs_053993.1_at	3.08084	0.028103
Lotus japonicus similar to At3g22740: selenocysteine methyltransferase like protein	chr5.CM0357.24.7_at	3.03701	0.00337915
Lotus japonicus similar to At1g22450: Subunit 6b of cytochrome c oxidase	chr1.CM0016.16_at	-0.360568	0.0803602
Lotus japonicus similar to At5g64750: unknown protein	chr5.CM0052.19_at	3.01388	0.00223709
Lotus japonicus similar to At1g22460: Similar to auxin-independent growth promoter	chr1.CM0016.21_at	0.0284354	0.996146
Lotus japonicus similar to At1g22460: Similar to auxin-independent growth promoter	chr1.CM0016.21_s_at	0.375372	0.459111
Lotus japonicus similar to At1g22410: Putative phospho-2-dehydro-3-deoxyheptonate aldolase 1 precursor	chr1.CM0016.7_at	-0.208181	0.75197
Lotus japonicus similar to O64410: (O64410) CYTOCHROME P450 MONOOXYGENASE (FRAGMENT)	chr1.CM0016.8_at	-0.0170287	0.993907
Lotus japonicus hypothetical protein	chr1.CM0016.9_x_at	0.0107148	0.983504
Lotus japonicus similar to At2g20980: hypothetical protein	chr1.CM0017.11_at	-0.0226557	0.857403
Lotus japonicus similar to Q9LI56: (Q9LI56) EST AU055734(S20025) CORRESPONDS TO A REGIO	chr1.CM0017.17_at	-0.00999358	0.963668
Lotus japonicus similar to At3g51300: rac-like GTP binding protein Arac11	chr1.CM0017.2_at	-0.0933099	0.88546
Lotus japonicus similar to Q9SCU8: (Q9SCU8) BETA-GALACTOSIDASE PRECURSOR (EC 3.2.1.23)	chr1.CM0017.21_at	0.0003848	0.999999
Lotus japonicus similar to Q9FPR1: (Q9FPR1) PUTATIVE ACID PHOSPHATASE	CM1488.11_at	2.98579	0.0127242
Lotus japonicus similar to At4g17030: allergen like protein	Ljwgs_096936.1_at	2.97924	0.0117958
Lotus japonicus similar to At5g27730: unknown protein	chr1.CM0017.35_at	-0.00229247	0.999999
Lotus japonicus similar to At4g35100: plasma membrane intrinsic protein PIP3	chr1.CM0017.36_at	-1.25105	0.123377
<not provided>	TC15132_at	2.91243	0.00181492
Lotus japonicus similar to At5g06120: human RAN binding protein 16-like	chr1.CM0017.41_at	0.246804	0.636444
Lotus japonicus similar to At2g39800: delta-1-pyrroline 5-carboxylase synthetase (P5C1)	Ljwgs_006172.2_at	2.893	0.00182446
Lotus japonicus similar to At4g12760: hypothetical protein	chr1.CM0017.44_at	0.212846	0.510111
Lotus japonicus similar to At3g06980: putative DEAD DEAH box helicase	chr1.CM0017.48_at	-0.612854	0.203903
Lotus japonicus similar to At2g16730: putative beta-galactosidase	chr1.CM0017.5_at	-0.0205169	0.999999
Lotus japonicus similar to At2g16750: putative protein kinase	chr1.CM0017.7_at	-0.105466	0.940301
Lotus japonicus similar to At5g15250: FtsH-like protein Pftf precursor - like	Ljwgs_047526.1_at	2.85792	0.010086
Lotus japonicus hypothetical protein	chr1.CM0023.12_at	-0.00157481	0.999999
Lotus japonicus similar to At3g03960: putative T-complex protein 1, theta subunit (TCP-1-Theta)	chr1.CM0023.19_at	-0.53322	0.23001
Lotus japonicus similar to At3g03960: putative T-complex protein 1, theta subunit (TCP-1-Theta)	chr1.CM0023.19_s_at	-0.525137	0.0918991
Lotus japonicus similar to At1g26850: unknown protein	chr1.CM0023.24_at	-0.228103	0.806782
Lotus japonicus similar to At1g18800: unknown protein	chr1.CM0023.33_at	0.0672122	0.978047
Lotus japonicus similar to At1g65930: NADP specific isocitrate dehydrogenase like protein	chr1.CM0023.4_at	0.365129	0.257659
Lotus japonicus similar to At3g09220: putative laccase	chr1.CM0023.41_at	0.263944	0.833463
Lotus japonicus similar to At1g74560: putative SET protein, phospatase 2A inhibitor	chr1.CM0023.42_at	-0.0397616	0.989385
Lotus japonicus similar to Q9AS30: (Q9AS30) P0416G11.14 PROTEIN	chr1.CM0027.11_x_at	-0.0808632	0.562578
Lotus japonicus similar to At5g62150: unknown protein	chr5.CM0953.47_at	2.85303	7.2589e-05
Lotus japonicus similar to At3g57040: responce reactor 4	chr1.CM0027.22_at	0.411572	0.489475
Lotus japonicus similar to Q9AS30: (Q9AS30) P0416G11.14 PROTEIN	chr1.CM0027.6.1_at	-0.171106	0.662071
Lotus japonicus similar to At1g20390: hypothetical protein	chr1.CM0027.8.1_at	-0.245313	0.781807
Lotus japonicus similar to At2g04660: unknown protein	chr1.CM0029.15_at	0.0149815	0.959481
<not provided>	TC10035_at	2.84887	0.0180081
Lotus japonicus similar to At3g58490: putative protein	chr1.CM0029.21_at	0.582036	0.196686
Lotus japonicus similar to At3g58500: phosphoprotein phosphatase 2A isoform 4	chr1.CM0029.22_at	-0.0245547	0.989433
Lotus japonicus similar to At3g11960: hypothetical protein	chr1.CM0029.24_at	0.346857	0.144707
Lotus japonicus similar to At4g31200: predicted protein	chr1.CM0029.27_at	0.270959	0.686976
Lotus japonicus similar to At4g29430: ribosomal protein S15a homolog	chr1.CM0029.28_at	-0.472898	0.108708
Lotus japonicus similar to At4g29430: ribosomal protein S15a homolog	chr1.CM0029.28_x_at	-0.218387	0.419275
Lotus japonicus similar to Q9AV87: (Q9AV87) 60S RIBOSOMAL PROTEIN L21	chr1.CM0029.3_at	-0.767223	0.0647831
Lotus japonicus similar to At5g16080: unknown protein	Ljwgs_094732.1_at	2.82342	0.00752548
Lotus japonicus similar to At3g58460: unknown protein	chr1.CM0029.32.1_at	0.361024	0.0717574
Lotus japonicus similar to LEU1_SOYBN: (Q39891) PROBABLE 2-ISOPROPYLMALATE SYNTHASE (EC	Ljwgs_054236.1_s_at	2.78492	0.0150768
Lotus japonicus similar to At3g58460: unknown protein	chr1.CM0029.32_at	0.349454	0.0713016
Lotus japonicus similar to At2g20840: putative secretory carrier-associated membrane protein	chr1.CM0029.33_x_at	-0.0795343	0.536938
Lotus japonicus similar to At4g31200: predicted protein	chr1.CM0029.34_at	0.253853	0.604305
Lotus japonicus similar to At3g11950: hypothetical protein	chr1.CM0029.35_at	0.0160177	0.93303
Lotus japonicus similar to At5g20480: receptor protein kinase - like	TM0855.10.1_at	2.76853	0.0466124
Lotus japonicus similar to At5g06600: ubiquitin carboxyl-terminal hydrolase	chr1.CM0029.37_at	0.277862	0.337252
Lotus japonicus similar to At1g35940: hypothetical protein	chr1.CM0029.38_x_at	-0.0182614	0.931811
Lotus japonicus similar to At3g18830: sugar transporter like protein	Ljwgs_065724.1_s_at	2.75413	0.0330724
Lotus japonicus similar to At3g58560: unknown protein	chr1.CM0029.4_at	0.0214825	0.884373
Lotus japonicus similar to Q9XH44: (Q9XH44) CEN-LIKE PROTEIN 1 / TFL1 C grapevine (terminal flowering, important for flowering)	Ljwgs_036664.1_at	2.74783	1.0942e-05
Lotus japonicus similar to At3g11900: putative amino acid transporter protein	chr1.CM0029.47_at	0.361277	0.190223
Lotus japonicus similar to At3g58580: putative protein	chr1.CM0029.5.1_s_at	0.198146	0.0930679
Lotus japonicus similar to At3g58520: unknown protein	chr1.CM0029.8_at	0.507458	0.132983
Lotus japonicus similar to At1g34020: unknown protein	chr1.CM0032.21.1_at	0.135843	0.685704
Lotus japonicus similar to At4g39400: brassinosteroid insensitive 1 gene (BRI1)	chr1.CM0032.25_at	-0.177273	0.602125
Lotus japonicus similar to At5g41980: unknown protein	chr1.CM0032.28.1_at	0.39445	0.251978
Lotus japonicus similar to At5g41980: unknown protein	chr1.CM0032.28.1_x_at	0.176865	0.541182
Lotus japonicus similar to At2g21790: ribonucleoside-diphosphate reductase large subunit	chr1.CM0032.3_at	-0.466886	0.436483
Lotus japonicus similar to At5g64811: WRKY transcription factor 51 (WRKY51)	chr1.CM0032.32_at	0.627629	0.339926
Lotus japonicus similar to At4g39470: unknown protein	chr1.CM0032.46.1_at	0.244169	0.412595
Lotus japonicus similar to At4g39470: unknown protein	chr1.CM0032.46_at	0.303854	0.319821
Lotus japonicus similar to At5g64750: unknown protein	chr1.CM0032.5_at	-0.0131606	0.999999
Lotus japonicus similar to At5g64830: unknown protein	chr1.CM0032.55_at	0.0858986	0.684092
Lotus japonicus similar to At5g64840: ABC transporter protein 1-like	chr1.CM0032.57_at	0.670888	0.0992065
Lotus japonicus similar to Q9SMK3: (Q9SMK3) HYPOTHETICAL 12.4 KDA PROTEIN (FRAGMENT)	chr1.CM0032.58_at	0.605818	0.342531
Lotus japonicus similar to At4g39520: GTP-binding - like protein	chr1.CM0032.59_at	0.0632866	0.879961
Lotus japonicus similar to Q9ZRJ0: (Q9ZRJ0) ORF(AA 1-1338)	chr5.CM0519.59.1_x_at	2.74473	0.0298526
Lotus japonicus similar to At3g62650: putative protein	Ljwgs_016087.0.1_at	2.72629	0.0134826
Lotus japonicus similar to At5g64860: 4-alpha-glucanotransferase	chr1.CM0032.64_at	-0.595394	0.0815411
Lotus japonicus similar to Q38705: (Q38705) DNA-BINDING PROTEIN	chr5.CM0040.40.1_at	2.71546	0.0198995
BP046017 Lotus corniculatus var. japonicus pods (less than 20 mm in length) Lotus corniculatus var. japonicus cDNA clone SPD025h11_f 3 , mRNA sequence reverse complement	gi45579911_at	2.70906	0.00204447
Lotus japonicus similar to P93325: (P93325) DELTA-1-PYRROLINE-5-CARBOXYLATE SYNTHASE (F	Ljwgs_053689.1_at	2.70672	0.000506268
Lotus japonicus similar to At2g37040: phenylalanine ammonia lyase (PAL1)	chr1.CM0033.27.1_x_at	-0.128416	0.989388
Lotus japonicus similar to At5g15450: clpB heat shock protein-like	chr1.CM0033.29_x_at	-0.0519018	0.822015
Lotus japonicus similar to PAL1_SOYBN: (P27991) PHENYLALANINE AMMONIA-LYASE 1 (EC 4.3.1	chr1.CM0033.3.1_at	-0.122885	0.986098
Lotus japonicus similar to PAL1_SOYBN: (P27991) PHENYLALANINE AMMONIA-LYASE 1 (EC 4.3.1	chr1.CM0033.3.1_x_at	0.229956	0.942824
Lotus japonicus similar to At2g37210: unknown protein	chr1.CM0033.3_at	-1.27215	0.0633281
Lotus japonicus similar to At2g37040: phenylalanine ammonia lyase (PAL1)	chr1.CM0033.30_at	-0.85505	0.762461
Lotus japonicus similar to At2g37040: phenylalanine ammonia lyase (PAL1)	chr1.CM0033.32_x_at	0.673087	0.180003
Lotus japonicus similar to At2g37040: phenylalanine ammonia lyase (PAL1)	chr1.CM0033.36_at	0.332829	0.750103
Lotus japonicus similar to At2g37040: phenylalanine ammonia lyase (PAL1)	chr1.CM0033.36_x_at	0.245554	0.81972
Lotus japonicus similar to At2g37040: phenylalanine ammonia lyase (PAL1)	chr1.CM0033.39_x_at	0.554135	0.310123
Lotus japonicus similar to At2g01170: putative amino acid or GABA permease	chr1.CM0036.11_at	-0.0828511	0.950683
Lotus japonicus similar to LEU1_SOYBN: (Q39891) PROBABLE 2-ISOPROPYLMALATE SYNTHASE (EC	Ljwgs_035318.1_s_at	2.69579	0.0286238
Lotus japonicus similar to At2g25625: unknown protein	Ljwgs_020504.1_x_at	2.69454	0.00340921
Lotus japonicus similar to At3g09850: putative protein	chr1.CM0036.19_at	0.640944	0.0554302
Lotus japonicus similar to At5g63910: unknown protein	chr1.CM0036.22.1_at	0.0684337	0.928138
Lotus japonicus similar to At5g63910: unknown protein	chr1.CM0036.22.2_at	0.154147	0.4067
Lotus japonicus similar to At5g39450: unknown protein	chr1.CM0036.22_at	0.291683	0.560147
Lotus japonicus similar to At5g09260: unknown protein	chr1.CM0036.23_at	0.626872	0.132965
Lotus japonicus similar to At1g77380: amino acid permease AAP3	chr1.CM0036.3_s_at	0.382533	0.220173
Lotus japonicus similar to At5g63920: DNA topoisomerase III	chr1.CM0036.44_at	0.00832911	0.98248
Lotus japonicus similar to At4g12780: auxilin-like protein	chr1.CM0036.5_at	0.372906	0.165475
Lotus japonicus similar to At5g63860: UVB-resistance protein UVR8 (gb|AAD43920.1)	chr1.CM0036.6.1_at	0.315262	0.065844
Lotus japonicus similar to At2g26140: FtsH like protease	chr1.CM0039.1.2_at	0.0143926	0.928806
Lotus japonicus similar to At1g75850: vacuolar sorting protein 35, putative	chr1.CM0039.11.1_s_at	0.0581162	0.580239
Lotus japonicus similar to VPE_SOYBN: (P49045) VACUOLAR PROCESSING ENZYME PRECURSOR (EC	Ljwgs_015846.1_at	2.68724	0.000875266
Lotus japonicus similar to Q9AXC3: (Q9AXC3) HYPOTHETICAL 164.8 KDA PROTEIN	chr1.CM0039.18_at	0.0181496	0.998963
Lotus japonicus similar to Q9AXC3: (Q9AXC3) HYPOTHETICAL 164.8 KDA PROTEIN	chr1.CM0039.18_x_at	0.141427	0.865214
Lotus japonicus similar to At5g61030: RNA-binding protein - like	chr1.CM0039.21_at	-0.00196905	0.999999
Lotus japonicus similar to At5g61030: RNA-binding protein - like	chr1.CM0039.21_s_at	-0.0372425	0.714031
Lotus japonicus similar to At3g49220: pectinesterase - like protein	chr1.CM0039.27_at	-0.752073	0.157829
Lotus japonicus similar to At5g62470: MYB96 transcription factor-like protein	chr1.CM0023.10_at	2.66099	0.0451721
Lotus japonicus similar to At5g24260: dipeptidyl peptidase IV-like protein	chr1.CM0039.29_at	0.242408	0.0991978
Lotus japonicus similar to Q9AY56: (Q9AY56) HYPOTHETICAL 57.9 KDA PROTEIN	chr1.CM0039.31_x_at	0.0125914	0.985955
Lotus japonicus similar to Q91594: (Q91594) CELLULAR NUCLEIC ACID BINDING PROTEIN	chr1.CM0039.33.1_x_at	-0.0897125	0.440261
Lotus japonicus similar to AAK50002: (AAK50002) ORF73	chr1.CM0039.36_at	-0.00349013	0.997448
Lotus japonicus similar to Q9ZRJ0: (Q9ZRJ0) ORF(AA 1-1338)	chr5.CM0519.59.1_at	2.65053	0.0258437
Lotus japonicus similar to Q9LGX2: (Q9LGX2) ESTS AU082689(E31988)	chr1.CM0039.40_at	0.190195	0.543284
Lotus japonicus similar to At3g49240: putative protein	chr1.CM0039.43_at	-0.292951	0.355988
Lotus japonicus similar to At5g55590: putative protein	chr1.CM0039.44_at	-0.0477919	0.989358
Lotus japonicus similar to Q9XGC2: (Q9XGC2) SINA1P	chr1.CM0039.45_at	0.0542473	0.947399
Lotus japonicus similar to At1g31910: hypothetical protein	chr1.CM0039.46_s_at	0.447331	0.0882513
Lotus japonicus similar to At5g53400: unknown protein	chr1.CM0039.5_at	0.000719764	0.999999
Lotus japonicus similar to Q9FVE7: (Q9FVE7) PLASMA MEMBRANE CA2+-ATPASE	chr1.CM0050.1_s_at	0.0242841	0.997467
Lotus japonicus similar to At2g25625: unknown protein	Ljwgs_020504.1_at	2.60954	0.0122182
Lotus japonicus similar to At5g65860: unknown protein	chr1.CM0050.10_at	-0.0760151	0.894167
Lotus japonicus similar to At2g13810: putative aspartate aminotransferase	chr1.BM1737.16_at	2.5912	0.00372973
Lotus japonicus similar to Q9ZSP7: (Q9ZSP7) CYTOCHROME B5 DIF-F	chr1.CM0050.12_at	-0.304877	0.931125
Lotus japonicus similar to At4g24220: unknown protein	chr1.CM0050.15.1_at	-0.0589788	0.956445
Lotus japonicus similar to At4g24220: unknown protein	chr1.CM0050.15_at	0.0745017	0.671778
Lotus japonicus similar to At4g24220: unknown protein	chr1.CM0050.15_x_at	0.0465134	0.911394
Lotus japonicus similar to At1g27750: unknown protein	chr1.CM0050.2_s_at	0.168447	0.81539
Lotus japonicus similar to At5g59845: unknown protein	chr1.CM0050.20.1_at	-2.61148	0.217025
Lotus japonicus similar to At4g18365: protease HhoA like precursor	chr1.CM0050.21_s_at	-0.0524385	0.880589
Lotus japonicus similar to At5g56510: putative protein	chr1.CM0050.22_at	0.0228952	0.898433
Lotus japonicus hypothetical protein	chr1.CM0050.25_s_at	0.00182916	0.999999
Lotus japonicus similar to At4g24220: unknown protein	chr1.CM0050.36_at	0.0283176	0.800015
Lotus japonicus similar to At1g27450: adenine phosphoribosyltransferase 1, APRT	chr1.CM0050.4_at	-0.553734	0.0797239
Lotus japonicus similar to At4g30510: unknown protein	chr1.CM0050.40_at	0.203528	0.653978
Lotus japonicus similar to At1g47240: stress response protein Nramp2	chr1.CM0050.43_at	0.129724	0.834643
Lotus japonicus similar to At1g47240: stress response protein Nramp2	chr1.CM0050.44_at	0.0151201	0.999999
Lotus japonicus similar to At1g27730: salt-tolerance zinc finger protein like	chr1.CM0050.5.1_at	0.138279	0.98633
Lotus japonicus similar to At3g42110: putative protein	chr1.CM0051.1_s_at	-0.00675715	0.999999
Lotus japonicus hypothetical protein	chr1.CM0051.10_at	0.0350344	0.734551
Lotus japonicus similar to At3g12110: unknown protein	chr1.CM0051.14_at	0.494969	0.169428
Lotus japonicus similar to At5g60450: auxin response factor 4	chr1.CM0051.16_at	-0.00138183	0.999999
Lotus japonicus similar to At5g39950: thioredoxin	chr1.CM0051.18.1_at	-0.00136278	0.999999
Lotus japonicus similar to At1g02270: unknown protein	chr1.CM0051.18_s_at	0.175544	0.623698
Lotus japonicus similar to At5g39950: thioredoxin	chr1.CM0051.20_at	0.314783	0.277499
Lotus japonicus similar to At5g15070: unknown protein	chr1.CM0051.22_at	-0.809101	0.215253
Lotus japonicus hypothetical protein	chr1.CM0051.3_at	0.0473103	0.834267
Lotus japonicus similar to At1g03140: unknown protein	chr1.CM0051.31_at	0.427003	0.426178
Lotus japonicus similar to At2g44900: hypothetical protein	chr1.CM0051.32_at	-0.142175	0.826901
Lotus japonicus similar to At2g44900: hypothetical protein	chr1.CM0051.33_at	-0.117948	0.718046
Lotus japonicus similar to At1g05940: unknown protein (At1g05940)	chr1.CM0051.37_at	0.119226	0.858017
Lotus japonicus similar to At1g05940: unknown protein (At1g05940)	chr1.CM0051.38_s_at	0.0663134	0.906145
Lotus japonicus similar to At2g05940: putative protein kinase	chr5.TM0455.4_at	2.58255	0.0119309
Lotus japonicus similar to At1g05940: unknown protein (At1g05940)	chr1.CM0051.45.1_at	-0.0877509	0.890496
Lotus japonicus similar to At1g05940: unknown protein (At1g05940)	chr1.CM0051.45.1_s_at	0.123145	0.901454
Lotus japonicus similar to At1g05940: unknown protein (At1g05940)	chr1.CM0051.45_at	0.00961446	0.999999
Lotus japonicus similar to At1g05940: unknown protein (At1g05940)	chr1.CM0051.45_s_at	0.179964	0.581819
Lotus japonicus similar to At2g44900: hypothetical protein	chr1.CM0051.51.1_at	0.0518313	0.894419
Lotus japonicus similar to At5g40010: putative protein	chr1.CM0051.57_at	0.246353	0.681225
Lotus japonicus similar to At3g60380: putative protein	chr1.CM0051.59_at	-0.612821	0.0697679
Lotus japonicus similar to At3g55610: delta-1-pyrroline-5-carboxylate synthetase	Ljwgs_032463.1_at	2.57242	0.000485241
Lotus japonicus similar to At2g44900: hypothetical protein	chr1.CM0051.60_at	0.0217113	0.999474
Lotus japonicus similar to At1g80500: unknown protein	chr1.CM0063.23_at	-0.118414	0.596879
Lotus japonicus similar to At1g63300: hypothetical protein	chr1.CM0063.3_at	0.00620029	0.989227
Lotus japonicus similar to At5g41040: N-hydroxycinnamoyl benzoyltransferase-like protein	chr1.CM0063.31_at	-0.0336554	0.920427
Lotus japonicus similar to At5g63550: unknown protein	chr1.CM0063.32_at	-0.363711	0.387822
Lotus japonicus similar to At2g47620: SWI SNF family like transcription activator	chr1.CM0063.39_at	0.269743	0.165614
Lotus japonicus similar to At3g44200: protein kinase-like protein	chr1.CM0063.41_at	-0.0139573	0.990911
Lotus japonicus similar to At5g01750: unknown protein	TM0540.11.1_at	2.56917	0.0236739
Lotus japonicus similar to O81120: (O81120) NODULE-SPECIFIC PROTEIN NLJ70	Ljwgs_101266.1_at	2.56356	0.00253761
Lotus japonicus similar to At3g42100: putative protein	chr1.CM0063.46_at	0.046772	0.701852
Lotus japonicus hypothetical protein	chr1.CM0063.5_x_at	0.00906503	0.976094
Lotus japonicus hypothetical protein	chr1.CM0063.52.1_x_at	0.0242443	0.834905
Lotus japonicus similar to At1g67920: unknown protein	chr4.CM0042.26_at	2.52591	0.0083013
Lotus japonicus similar to At1g58032: unknown protein	chr1.CM0063.57_at	0.34774	0.255351
Lotus japonicus similar to At5g01520: C3HC4 type Zinc RING finger like protein	TM0548.13_at	2.51453	0.000664849
Lotus japonicus similar to At2g24130: putative receptor-like protein kinase	chr1.CM0063.68_at	-0.132241	0.887747
Lotus japonicus similar to At1g21230: hypothetical protein	chr1.CM0064.11.1_at	-0.255863	0.710759
Lotus japonicus similar to At1g21230: hypothetical protein	chr1.CM0064.11.1_s_at	-0.185421	0.86019
Lotus japonicus similar to At1g21230: hypothetical protein	chr1.CM0064.11.1_x_at	-0.189889	0.834071
Lotus japonicus similar to At5g14270: kinase - like protein	chr1.CM0064.12_at	0.397601	0.609045
Lotus japonicus similar to At1g21270: putative protein	chr1.CM0064.14_x_at	0.0398537	0.790536
matR -mitochondrial genome-	chr1.CM0064.15.1_s_at	-0.35182	0.426733
nad5 -mitochondrial genome-	chr1.CM0064.15.3_s_at	0.0532	0.94185
Lotus japonicus similar to At1g35940: hypothetical protein	chr1.CM0064.17_x_at	-0.00762616	0.979647
Lotus japonicus similar to At1g21380: unknown protein	chr1.CM0064.18_at	0.17118	0.589145
Lotus japonicus similar to At1g21380: unknown protein	chr1.CM0064.20.1_at	0.056411	0.919121
Lotus japonicus similar to At1g21240: hypothetical protein	chr1.CM0064.22_at	-0.362655	0.780479
Lotus japonicus similar to At5g24330: putative protein	chr1.CM0064.27_at	-0.899992	0.0628424
Lotus japonicus similar to Q40291: (Q40291) ORF167	chr1.CM0064.39_at	0.0919641	0.486855
Lotus japonicus similar to Q40291: (Q40291) ORF167	chr1.CM0064.39_x_at	-0.0333169	0.724061
Lotus japonicus similar to At5g14270: kinase - like protein	chr1.CM0064.4.1_at	-0.210439	0.398657
Lotus japonicus similar to Q9LMN8: (Q9LMN8) F16F4.8 PROTEIN	chr1.CM0064.41_at	0.028611	0.995243
Lotus japonicus similar to At5g39050: Anthocyanin acyltransferase - like protein	chr1.CM0410.16_at	2.50608	0.0395182
Lotus japonicus similar to At5g14280: unknown protein	chr1.CM0064.5_at	0.52577	0.477156
Lotus japonicus hypothetical protein	chr1.CM0064.51_at	0.0169503	0.919186
Lotus japonicus similar to At1g76320: putative phytochrome A signaling protein	chr1.CM0064.55_at	-0.020981	0.956841
Lotus japonicus similar to At5g66830: putative protein	chr1.CM0064.60_at	-0.101259	0.536213
Lotus japonicus similar to At3g01780: unknown protein	chr1.CM0064.62_at	-0.158399	0.687445
Lotus japonicus similar to At1g12440: unknown protein	chr1.CM0064.63_at	-0.0203095	0.971123
Lotus japonicus hypothetical protein	chr1.CM0064.64.1_at	0.160987	0.661325
Lotus japonicus similar to At1g28040: hypothetical protein	chr4.CM0025.38_at	2.49516	0.00499852
Lotus japonicus similar to At5g14250: unknown protein	chr1.CM0064.64_at	0.0574169	0.848905
Lotus japonicus similar to At5g40840: RAD21-1 variant 2	chr1.CM0064.65_at	-0.0171989	0.923848
Lotus japonicus similar to At5g27380: glutathione synthetase gsh2	chr1.CM0544.33_s_at	2.48707	0.00709599
Lotus japonicus similar to At3g53230: CDC48 - like protein	chr1.CM0171.55_at	2.48025	0.0131036
Lotus japonicus similar to At1g72830: unknown protein	chr3.CM0724.4_at	2.46218	0.00110989
Lotus japonicus hypothetical protein	chr1.CM0078.11_at	-0.00202888	0.999999
Lotus japonicus similar to At1g21570: glycine-rich RNA-binding protein grp1a, putative	chr1.CM0078.12_at	0.348093	0.240367
Lotus japonicus similar to At1g21580: hypothetical protein	chr1.CM0078.14_at	0.351581	0.573721
Lotus japonicus hypothetical protein	chr1.CM0078.18_s_at	0.0743781	0.895173
Lotus japonicus similar to At2g17890: putative calcium-dependent ser thr protein kinase	chr1.CM0078.21_x_at	0.731807	0.102724
Lotus japonicus similar to At1g77280: hypothetical protein	chr1.CM0078.29.1_at	0.148042	0.888737
Lotus japonicus similar to At1g77280: hypothetical protein	chr1.CM0078.29_at	0.188158	0.697492
Lotus japonicus similar to At1g77120: alcohol dehydrogenase	chr1.CM0078.3_at	-0.129252	0.405831
Lotus japonicus similar to At3g30200: hypothetical protein	chr1.CM0078.4_at	0.113533	0.85021
Lotus japonicus hypothetical protein	chr1.CM0078.45_at	-0.00921577	0.977932
Lotus japonicus similar to At1g21550: unknown protein	chr1.CM0078.7_at	0.0567299	0.998882
Lotus japonicus similar to At4g01170: hypothetical protein	chr1.CM0078.8_at	0.000821767	0.999999
Lotus japonicus similar to At3g49200: putative protein	chr1.CM0088.1_at	0.0892501	0.897738
Lotus japonicus similar to TRPB_CAMAC: (O50046) TRYPTOPHAN SYNTHASE BETA CHAIN 2 PRECUR	chr1.CM0088.104_at	1.44887	0.128692
Lotus japonicus similar to At4g04885: unknown protein	chr1.CM0088.106_at	0.295905	0.407816
Lotus japonicus similar to At4g04885: unknown protein	chr1.CM0088.106_s_at	0.24154	0.272462
Lotus japonicus similar to At1g76630: hypothetical protein, 3 partial	chr1.CM0088.12_at	0.0221869	0.985824
Lotus japonicus similar to At3g23700: unknown protein	chr1.CM0088.13.1_at	-0.0930487	0.80796
Lotus japonicus similar to At3g19170: metalloprotease - like protein	chr1.CM0088.13_at	-0.148547	0.897381
Lotus japonicus similar to At3g49200: putative protein	chr1.CM0088.14.1_s_at	-0.120535	0.896516
Lotus japonicus similar to P93365: (P93365) IMMEDIATE-EARLY SALICYLATE-INDUCED GLUCOSYL	chr1.CM0088.14_at	1.06509	0.0983321
Lotus japonicus similar to At3g19210: DNA repair protein, putative	chr1.CM0088.18.1_at	-0.191937	0.793644
Lotus japonicus similar to At4g34150: unknown protein	chr1.CM0088.21.1_at	0.0342955	0.995539
Lotus japonicus similar to At1g49630: putative hydrogenase (At1g49630)	chr1.CM0088.21_at	0.0319578	0.976584
Lotus japonicus similar to At3g01920: unknown protein	chr1.CM0088.23_at	0.0305394	0.997448
Lotus japonicus similar to At3g43610: putative protein	chr1.CM0088.25.1_at	-0.164337	0.465422
Lotus japonicus similar to At3g43610: putative protein	chr1.CM0088.25_at	-0.35054	0.559293
Lotus japonicus similar to At3g19440: unknown protein	chr1.CM0088.27.1_at	-0.356375	0.0901279
Lotus japonicus similar to At3g19440: unknown protein	chr1.CM0088.27_at	-0.398546	0.436092
Lotus japonicus similar to At3g19440: unknown protein	chr1.CM0088.27_s_at	-0.425426	0.221712
Lotus japonicus similar to At4g33170: putative protein	chr1.CM0088.3_at	0.102702	0.654888
Lotus japonicus similar to Q9XIY9: (Q9XIY9) NTPRP27	chr1.CM0088.31_at	2.63617	0.488295
Lotus japonicus similar to At5g44750: unknown protein	chr1.CM0088.33_at	0.346577	0.223133
Lotus japonicus similar to AAK54292: (AAK54292) PUTATIVE HELICASE	chr1.CM0088.34_x_at	0.147967	0.832438
Lotus japonicus similar to At1g48120: serine threonine phosphatase PP7, putative	chr1.CM0088.4_x_at	-0.094994	0.664933
Lotus japonicus similar to BAB33617: (BAB33617) COPPER HOMEOSTASIS PROTEIN	chr1.CM0088.40_at	-0.00887343	0.986365
Lotus japonicus similar to Q9ETV0: (Q9ETV0) RIORF104 PROTEIN (RIORF102 PROTEIN)	chr1.CM0088.41.3_at	-0.0685215	0.803752
orf294 -mitochondrial genome-	CM0345.59.2_at	2.45978	0.0278933
Lotus japonicus similar to At5g02860: putative protein	chr1.CM0088.47_at	0.596006	0.234888
Lotus japonicus similar to At3g43740: leucine-rich repeat protein LRP -like	chr1.CM0088.49_at	0.108356	0.826604
Lotus japonicus similar to At3g49940: unknown protein	chr1.CM0088.54_at	-0.0042231	0.994173
Lotus japonicus similar to At1g49980: unknown protein	chr1.CM0088.55_at	0.264922	0.371575
Lotus japonicus similar to At3g19630: unknown protein	chr1.CM0088.56_at	0.00567602	0.999999
Lotus japonicus similar to P93484: (P93484) BP-80 VACUOLAR SORTING RECEPTOR	chr1.CM0088.58.1_at	0.0836954	0.834295
Lotus japonicus similar to At2g14740: putative vacuolar sorting receptor	chr1.CM0088.58_at	0.504181	0.334045
Lotus japonicus similar to At1g49630: putative hydrogenase (At1g49630)	chr1.CM0088.6.1_at	0.0451624	0.961816
Lotus japonicus similar to At3g19590: mitotic checkpoint protein, putative	chr1.CM0088.61_at	-0.8925	0.150782
Lotus japonicus similar to At1g49980: unknown protein	chr1.CM0088.62.2_at	0.120377	0.834971
Lotus japonicus similar to At2g17220: protein kinase like protein	Ljwgs_079875.1_s_at	2.4335	0.0026393
Lotus japonicus similar to At2g41420: unknown protein	chr1.CM0088.65_at	-0.0438775	0.976244
Lotus japonicus similar to At4g14830: unknown protein	Ljwgs_061847.1_at	2.42829	0.0153073
Lotus japonicus similar to At4g33800: unknown protein	chr1.CM0088.68_at	0.0118296	0.954994
Lotus japonicus similar to At3g10450: putative glucose acyltransferase	chr1.CM0088.69_at	-0.00403136	0.996127
Lotus japonicus similar to At2g14660: hypothetical protein	chr1.CM0088.70_at	-0.0724163	0.769056
Lotus japonicus similar to At1g50030: unknown protein	chr1.CM0088.71.2_at	-0.12984	0.914362
Lotus japonicus similar to At1g68170: MtN21-like protein	Ljwgs_068415.1_s_at	2.42503	0.0011005
Lotus japonicus similar to At1g50030: unknown protein	chr1.CM0088.73_at	0.127014	0.438927
Lotus japonicus similar to Q9FP34: (Q9FP34) P0035H10.7 PROTEIN	chr1.CM0088.75_x_at	-0.139841	0.416547
Lotus japonicus similar to At1g77920: bZip transcription factor AtbZip50	Ljwgs_031732.1_at	2.41942	0.00883079
Lotus japonicus similar to At4g33740: putative protein	chr1.CM0088.81_at	0.246949	0.406007
Lotus japonicus similar to At4g23180: receptor-like protein kinase 4 (RLK4)	chr1.CM0088.82_at	0.302876	0.307318
Lotus japonicus similar to At4g23180: receptor-like protein kinase 4 (RLK4)	chr1.CM0088.85_at	-0.0688369	0.57863
Lotus japonicus similar to At3g20600: non-race specific disease resistance protein (NDR1)	chr1.CM0088.86_at	0.00558507	0.999999
Lotus japonicus similar to At5g03710: putative protein	chr1.CM0088.88_at	-0.0583377	0.932619
Lotus japonicus hypothetical protein	chr1.CM0088.89_at	0.0380874	0.967101
Lotus japonicus similar to At4g21200: gibberellin 20-oxidase - like protein	chr1.CM0088.91_at	0.0781308	0.949981
Lotus japonicus similar to At4g04900: hypothetical protein	chr1.CM0088.99_at	-0.556501	0.371158
Lotus japonicus hypothetical protein	chr1.CM0094.101.1_at	-0.0495051	0.97464
Lotus japonicus similar to At5g47910: respiratory burst oxidase protein	chr1.CM0094.106_at	0.271048	0.727583
Lotus japonicus hypothetical protein	chr1.CM0094.118_at	-0.00382774	0.996261
Lotus japonicus similar to At5g07350: unknown protein	chr1.CM0094.119_at	-0.223032	0.354702
Lotus japonicus similar to At5g58350: MAP kinase	Ljwgs_022950.1_at	2.41737	4.35843e-05
Lotus japonicus similar to At1g17930: unknown protein	chr1.CM0094.123_at	-0.040903	0.884019
Lotus japonicus similar to At1g17930: unknown protein	chr1.CM0094.123_s_at	0.0105668	0.994741
Lotus japonicus similar to At5g23810: amino acid transporter	Ljwgs_124988.1_at	2.40946	0.00531271
Lotus japonicus similar to Q9ZTB2: (Q9ZTB2) NODULIN	Ljwgs_119620.1_at	2.38602	0.00820923
Lotus japonicus similar to At5g07320: peroxisomal Ca-dependent solute carrier-like protein	chr1.CM0094.131_at	-0.453628	0.0745417
Lotus japonicus similar to At5g23630: cation-transporting ATPase	chr1.CM0094.133_at	-0.333874	0.461776
Lotus japonicus similar to Q9MBE4: (Q9MBE4) CYTOCHROME P450	chr2.CM0250.7_at	2.37488	0.0200747
Lotus japonicus similar to At5g23630: cation-transporting ATPase	chr1.CM0094.138.1_s_at	-0.238649	0.70775
Lotus japonicus similar to At5g23630: cation-transporting ATPase	chr1.CM0094.138_at	-0.139264	0.589871
Lotus japonicus hypothetical protein	chr1.CM0094.140_at	0.171535	0.454463
Lotus japonicus similar to At5g17270: putative protein	chr1.CM0094.145.1_at	-0.310406	0.285871
Lotus japonicus similar to At5g17270: putative protein	chr1.CM0094.145_at	0.00313231	0.999999
Lotus japonicus similar to At1g04290: unknown protein	chr1.CM0094.148_at	0.469247	0.133774
Lotus japonicus similar to CDPK_SOYBN: (P28583) CALCIUM-DEPENDENT PROTEIN KINASE SK5 (E	chr1.CM0094.149_at	-0.255677	0.400854
Lotus japonicus similar to At1g27440: unknown protein	chr1.CM0094.15.1_s_at	0.0516825	0.958353
Lotus japonicus similar to At1g27440: unknown protein	chr1.CM0094.15.1_x_at	-0.146544	0.538609
Lotus japonicus similar to At5g61840: unknown protein	chr1.CM0094.15_at	0.221486	0.411201
Lotus japonicus similar to CDPK_SOYBN: (P28583) CALCIUM-DEPENDENT PROTEIN KINASE SK5 (E	chr1.CM0094.151_at	-0.335537	0.589145
Lotus japonicus similar to Q9LT06: (Q9LT06) GB|AAC97420.1	chr1.CM0094.153_at	-0.246251	0.424581
Lotus japonicus similar to At4g38180: unknown protein (At4g38180)	chr1.CM0094.4_at	0.0102521	0.976709
Lotus japonicus hypothetical protein	chr1.CM0094.47_x_at	0.260592	0.257488
Lotus japonicus similar to O48940: (O48940) POLYPHOSPHOINOSITIDE BINDING PROTEIN SSH2P	chr1.CM0094.5_at	0.482374	0.097528
Lotus japonicus hypothetical protein	chr1.CM0094.83.2_at	-0.132676	0.523694
Lotus japonicus hypothetical protein	chr1.CM0094.83.3_at	0.0107266	0.965569
Lotus japonicus similar to At4g33945: unknown protein	chr1.CM0094.83_at	0.453793	0.306394
Lotus japonicus similar to At4g33945: unknown protein	chr1.CM0094.83_s_at	0.590159	0.106549
Lotus japonicus similar to At5g51010: unknown protein	chr1.CM0094.85_at	0.22731	0.635286
Lotus japonicus similar to At5g51020: unknown protein	chr1.CM0094.86_at	0.390362	0.118721
Lotus japonicus similar to At1g15740: putative leucine rich protein	Ljwgs_024567.1_at	2.37017	0.0109372
Lotus japonicus similar to At5g51040: unknown protein	chr1.CM0094.89_at	0.546274	0.0622959
Lotus japonicus similar to UNI_PEA: (O48559) UNIFOLIATA PROTEIN	chr1.CM0094.9_at	-0.0118716	0.947361
Lotus japonicus similar to At1g14700: purple acid phosphatase -like protein	TM0286.9_at	2.36623	0.0137688
Lotus japonicus similar to At3g56900: unknown protein	chr1.CM0098.0.1_at	-0.0539578	0.923591
Lotus japonicus similar to At1g21720: 20S proteasome beta subunit PBC2 like protein	chr1.CM0098.13_at	-0.0563959	0.893647
Lotus japonicus similar to At5g01600: ferritin 1 precursor	chr3.CM0116.42_at	2.3436	0.000171176
Lotus japonicus similar to At3g13250: hypothetical protein	chr1.CM0098.18_at	-0.0101081	0.984673
Lotus japonicus similar to At4g22270: unknown protein	TM0721.12.1_at	2.3421	0.00727133
Lotus japonicus similar to At3g10740: putative alpha-L-arabinofuranosidase	chr1.CM0098.25_at	0.00153083	0.999999
Lotus japonicus similar to At3g10740: putative alpha-L-arabinofuranosidase	chr1.CM0098.26_at	-0.0529044	0.999999
Lotus japonicus similar to At5g04940: SET-domain protein-like	chr1.CM0098.27_at	0.105227	0.689232
Lotus japonicus similar to Q9FQE7: (Q9FQE7) GLUTATHIONE S-TRANSFERASE GST 11 (EC 2.5.1.	Ljwgs_035562.1_s_at	2.33452	0.0075433
Lotus japonicus similar to At3g10740: putative alpha-L-arabinofuranosidase	chr1.CM0098.31.1_at	1.25219	0.338945
Lotus japonicus similar to At4g33150: lysine-ketoglutarate reductase saccharopine dehydrogenase (LKR SDH)	chr4.CM0343.10.1_at	2.328	0.00116185
Lotus japonicus similar to Q9FP34: (Q9FP34) P0035H10.7 PROTEIN	chr1.CM0098.38_at	-0.0352453	0.988097
Lotus japonicus similar to At3g56940: putative dicarboxylate diiron protein (Crd1)	chr1.CM0098.39.1_at	-0.46598	0.111275
Lotus japonicus similar to At1g80840: transcription factor like protein	chr1.CM0433.8_at	2.32713	0.010283
Lotus japonicus similar to Q9ZT68: (Q9ZT68) RESISTANCE PROTEIN CANDIDATE RGC2K	chr1.CM0098.41_at	-0.130505	0.548432
Lotus japonicus similar to At4g33690: hypothetical protein	chr1.CM0098.43_at	0.114477	0.404035
Lotus japonicus similar to At1g74040: 2-isopropylmalate synthase like protein	chr1.CM0001.63_at	2.32453	0.0233514
Lotus japonicus similar to At3g04480: unknown protein	chr1.CM0098.47_s_at	-0.00170199	0.999999
Lotus japonicus similar to At2g01060: transfactor-like protein	chr1.CM0098.48_at	0.437502	0.0730786
Lotus japonicus similar to At2g41050: unknown protein	chr1.CM0098.49.1_at	0.128222	0.844552
Lotus japonicus similar to At2g41120: hypothetical protein	chr1.CM0098.50_at	0.132596	0.903325
Lotus japonicus similar to At3g56860: unknown protein	chr1.CM0098.51_at	-0.0159813	0.998868
Lotus japonicus similar to At3g56820: unknown protein	chr1.CM0098.53.1_at	0.118806	0.844735
Lotus japonicus similar to At1g63170: unknown protein	chr1.CM0098.9.1_at	0.17383	0.287311
Lotus japonicus similar to At1g21720: 20S proteasome beta subunit PBC2 like protein	chr1.CM0098.9_at	-0.138616	0.671385
Lotus japonicus similar to At1g49490: hypothetical protein	chr1.CM0101.19_x_at	-0.00169969	0.999999
Lotus japonicus similar to Q9LI56: (Q9LI56) EST AU055734(S20025) CORRESPONDS TO A REGIO	chr1.CM0101.23.1_x_at	-0.117851	0.416183
Lotus japonicus similar to Q9M6U1: (Q9M6U1) HOMOGENTISATE 1,2-DIOXYGENASE (EC 1.13.11.5	Ljwgs_026546.1_s_at	2.32091	0.00020284
Lotus japonicus similar to At3g61130: unknown protein	chr1.CM0101.34_at	-0.561846	0.083936
Lotus japonicus similar to Q9M4G8: (Q9M4G8) PUTATIVE RIPENING-RELATED P-450 ENZYME	chr1.CM0101.36_at	0.107191	0.957302
Lotus japonicus similar to Q9M4G8: (Q9M4G8) PUTATIVE RIPENING-RELATED P-450 ENZYME	chr1.CM0101.40_at	0.0378862	0.993016
Lotus japonicus similar to Q9M4G8: (Q9M4G8) PUTATIVE RIPENING-RELATED P-450 ENZYME	chr1.CM0101.43.1_at	0.0897682	0.871665
Lotus japonicus similar to Q9M4G8: (Q9M4G8) PUTATIVE RIPENING-RELATED P-450 ENZYME	chr1.CM0101.43_at	-0.490027	0.136226
Lotus japonicus similar to Q9M4G8: (Q9M4G8) PUTATIVE RIPENING-RELATED P-450 ENZYME	chr1.CM0101.43_x_at	-0.613443	0.213263
Lotus japonicus similar to Q9SSU6: (Q9SSU6) CYTOCHROME P450 (FRAGMENT)	chr1.CM0101.45_s_at	-0.305025	0.193711
Lotus japonicus similar to Q9SSU6: (Q9SSU6) CYTOCHROME P450 (FRAGMENT)	chr1.CM0101.45_x_at	-0.112213	0.640017
Lotus japonicus similar to Q9AWM0: (Q9AWM0) P0666G04.16 PROTEIN	chr1.CM0104.10.1_at	0.146088	0.735826
Lotus japonicus similar to At2g36590: putative proline transporter	chr2.TM0417.1_at	2.32021	0.00932989
Lotus japonicus similar to At1g69550: putative disease resistance protein	chr1.CM0104.17_at	0.0194306	0.935588
Lotus japonicus similar to At4g13070: putative protein	chr1.CM0104.18_s_at	0.194445	0.666328
Lotus japonicus similar to At5g15010: putative protein	chr1.CM0104.2_at	0.215378	0.196352
Lotus japonicus similar to At3g45590: putative protein	chr1.CM0104.20_at	0.419214	0.499016
Lotus japonicus similar to At5g55690: unknown protein	chr1.CM0104.25_at	0.01697	0.995212
Lotus japonicus similar to At1g55020: unknown protein	chr1.CM0104.3.1_x_at	0.827444	0.144887
Lotus japonicus similar to At3g47110: receptor protein kinase - like protein	TM0855.10_at	2.31702	0.0339553
Lotus japonicus similar to At4g10500: putative Fe(II) ascorbate oxidase	chr3.CM0208.34_at	2.30645	0.0297315
Lotus japonicus similar to At5g54080: homogentisate 1,2-dioxygenase	chr3.CM0282.63_at	2.30405	6.38298e-05
Lotus japonicus similar to At5g18270: NAM (no apical meristem)-like protein	chr1.CM0104.34_at	0.174272	0.941698
Lotus japonicus similar to At1g35910: unknown protein	chr1.CM0104.36_s_at	0.00428338	0.996943
Lotus japonicus similar to At1g09230: unknown protein	chr1.CM0104.38_at	-0.0740333	0.928477
Lotus japonicus similar to At3g57770: protein kinase - like protein	chr1.CM0104.39.1_at	0.103208	0.891874
Lotus japonicus similar to At3g57770: protein kinase - like protein	chr1.CM0104.40_at	0.135488	0.831617
Lotus japonicus similar to At5g18230: unknown protein	chr1.CM0104.41_at	-0.334574	0.41926
Lotus japonicus similar to At1g08570: thioredoxin like protein	chr1.CM0104.45.1_s_at	-0.23444	0.936821
Lotus japonicus similar to At1g08570: thioredoxin like protein	chr1.CM0104.45_at	-0.377769	0.852199
Lotus japonicus similar to At5g18230: unknown protein	chr1.CM0104.46.2_at	-0.0635808	0.610125
Lotus japonicus similar to At5g18230: unknown protein	chr1.CM0104.47.1_at	-0.287987	0.360461
Lotus japonicus similar to At3g12030: unknown protein	chr1.CM0104.5_at	-0.153	0.517751
Lotus japonicus similar to At1g64760: unknown protein	chr1.CM0104.51_at	-0.320859	0.236643
Lotus japonicus similar to At5g18290: unknown protein	chr1.CM0104.8_at	-0.0379406	0.838135
Lotus japonicus similar to At1g01210: unknown protein	chr1.CM0105.10_at	-0.377531	0.0643211
Lotus japonicus similar to At5g49960: putative protein	chr1.CM0105.104_s_at	0.0787807	0.935144
Lotus japonicus similar to Q9FYN8: (Q9FYN8) P0702D12.15 PROTEIN	chr1.CM0105.109_x_at	0.686411	0.154949
Lotus japonicus hypothetical protein	chr1.CM0105.11_at	0.0798332	0.888509
Lotus japonicus similar to At1g48580: hypothetical protein	chr1.CM0105.112.1_at	0.00642945	0.999817
Lotus japonicus similar to At3g14170: unknown protein	chr1.CM0105.115_s_at	0.000613904	0.999999
Lotus japonicus similar to At1g72340: putative translation initiation factor EIF-2B alpha subunit	chr1.CM0105.117_at	-0.166723	0.487412
Lotus japonicus similar to O04180: (O04180) PGE1 PROTEIN	chr1.CM0105.118_at	0.026571	0.803824
Lotus japonicus similar to At5g50720: unknown protein	chr1.CM0063.42_at	2.29581	0.0214467
Lotus japonicus similar to Q9Z0W6: (Q9Z0W6) PAX TRANSCRIPTION ACTIVATION DOMAIN INTERAC	chr1.CM0105.122_at	0.548491	0.500461
Lotus japonicus similar to Q9SEE6: (Q9SEE6) PECTINESTERASE (EC 3.1.1.11) (PECTIN METHYL	chr1.CM0105.124_at	-0.0574453	0.974136
Lotus japonicus similar to PMEU_LYCES: (Q43143) PECTINESTERASE U1 PRECURSOR (EC 3.1.1.1	chr1.CM0105.126_at	-0.259049	0.878338
Lotus japonicus similar to At1g72320: RNA-binding like protein	chr1.CM0105.128_at	0.148961	0.596244
Lotus japonicus similar to At1g72310: RING-H2 zinc finger protein (ATL3)	chr1.CM0105.129_at	0.547214	0.878695
Lotus japonicus similar to At1g53800: unknown protein	chr1.CM0105.130_at	-0.288152	0.226214
Lotus japonicus similar to At1g49490: hypothetical protein	chr1.CM0105.137_x_at	0.017584	0.999999
Lotus japonicus similar to At2g46550: unknown protein	chr1.CM0105.14_at	-0.529359	0.0966508
Lotus japonicus similar to At2g43970: unknown protein	chr1.CM0105.140_at	0.0894441	0.864154
Lotus japonicus similar to At1g76520: unknown protein	TM0933.10.1_at	2.29013	0.014802
Lotus japonicus similar to ODPB_PEA: (P52904) PYRUVATE DEHYDROGENASE E1 COMPONENT BETA	chr1.CM0105.145_at	-0.300509	0.133743
Lotus japonicus similar to Q9ZQY2: (Q9ZQY2) PYRUVATE DEHYDROGENASE E1 BETA SUBUNIT ISOF	chr1.CM0105.147_s_at	-0.202218	0.181288
Lotus japonicus similar to At2g46590: DOF zinc finger like protein	chr1.CM0105.15_at	-0.156905	0.259746
Lotus japonicus similar to At1g01220: unknown protein	chr1.CM0105.16.1_at	0.157983	0.812419
Lotus japonicus similar to At2g40510: 40S ribosomal protein S26	chr1.CM0105.18_at	-0.510531	0.0567957
Lotus japonicus similar to At3g61860: ARGININE SERINE-RICH SPLICING FACTOR RSP31	chr1.CM0105.20.1_at	0.133712	0.849195
Lotus japonicus similar to Q40192: (Q40192) RAB11B	chr1.CM0105.21_s_at	-0.0529704	0.74771
Lotus japonicus similar to At4g00880:	chr1.CM0105.25_at	0.881842	0.184006
Lotus japonicus similar to At3g61870: unknown protein	chr1.CM0105.29.1_s_at	-0.424349	0.0828203
Lotus japonicus similar to At3g61870: unknown protein	chr1.CM0105.29_s_at	-0.583589	0.0776995
Lotus japonicus similar to At2g46630: putative extensin	chr1.CM0105.32_at	-0.161392	0.873673
AV425738 Lotus japonicus young plants (two-week old) Lotus corniculatus var. japonicus cDNA clone MWM058e09_r 5 , mRNA sequence	gi7783979_at	2.2829	0.000388543
Lotus japonicus similar to At2g46700: calcium calmodulin-dependent protein kinase CaMK4	chr1.CM0105.36_at	0.0967033	0.847232
Lotus japonicus similar to At1g01225: unknown protein	chr1.CM0105.4_at	-0.322073	0.491694
Lotus japonicus similar to At4g00840: unknown protein	chr1.CM0105.41.1_at	0.0490271	0.750139
Lotus japonicus similar to O82459: (O82459) RAC GTPASE ACTIVATING PROTEIN 2 (FRAGMENT)	chr1.CM0105.41_s_at	0.0785157	0.91941
Lotus japonicus similar to At1g01120: putative fatty acid elongase 3-ketoacyl-CoA synthase 1 (At1g01120)	chr1.CM0105.44_s_at	-0.533759	0.252649
Lotus japonicus similar to At2g46735: unknown protein	chr1.CM0105.47_at	0.0356722	0.99813
Lotus japonicus similar to At4g00830: unknown protein	chr1.CM0105.48_at	-0.0719713	0.86825
Lotus japonicus similar to At2g46760: unknown protein	chr1.CM0105.49_at	0.0236153	0.996181
Lotus japonicus similar to At2g46760: unknown protein	chr1.CM0105.50_at	0.282275	0.585518
Lotus japonicus similar to At3g61920: unknown protein	chr1.CM0105.51_at	0.00148181	0.999999
Lotus japonicus similar to At1g49405: putative protein	chr3.CM0091.28_at	2.26385	0.0339921
Lotus japonicus similar to At1g01080: ribonucleoprotein, putative	chr1.CM0105.55_at	-0.454629	0.120635
Lotus japonicus similar to O81330: (O81330) F3D13.1 PROTEIN	chr1.CM0105.56_at	1.02383	0.140155
Lotus japonicus similar to At1g68620: putative carboxylesterase	Ljwgs_029205.1_at	2.2624	0.0104493
Lotus japonicus similar to At4g01410: putative hypoersensitive response protein	chr1.CM0105.58_at	-0.230171	0.552189
Lotus japonicus similar to At2g46800: putative zinc transporter	chr1.CM0105.60_at	-0.00344994	0.999552
Lotus japonicus similar to At2g46820: unknown protein	chr1.CM0105.61_at	0.0795791	0.884807
Lotus japonicus similar to Q42949: (Q42949) CATECHOL O-METHYLTRANSFERASE (EC 2.1.1.6)	chr1.CM0105.62_at	-0.487294	0.225681
Lotus japonicus similar to Q9FP34: (Q9FP34) P0035H10.7 PROTEIN	chr1.CM0105.63_x_at	0.0061438	0.987502
Lotus japonicus similar to Q42949: (Q42949) CATECHOL O-METHYLTRANSFERASE (EC 2.1.1.6)	chr1.CM0105.64_s_at	-0.388364	0.24354
Lotus japonicus similar to At5g54160: O-methyltransferase	chr1.CM0105.65.1_at	-0.10593	0.883672
Lotus japonicus similar to Q42949: (Q42949) CATECHOL O-METHYLTRANSFERASE (EC 2.1.1.6)	chr1.CM0105.65_at	0.0277465	0.983565
Lotus japonicus similar to At1g01040: CAF protein	chr1.CM0105.68_at	0.00902547	0.997749
Lotus japonicus similar to At1g01040: CAF protein	chr1.CM0105.70_at	0.647614	0.071331
Lotus japonicus similar to At1g01050: soluble inorganic pyrophosphatase, putative	chr1.CM0105.71_at	-0.0748589	0.985949
Lotus japonicus similar to At3g49600: putative protein	chr1.CM0105.72.1_at	-0.0553832	0.956017
Lotus japonicus similar to Q9LWB8: (Q9LWB8) O-METHYLTRANSFERASE	chr1.CM0105.82_at	-0.0135136	0.99791
Lotus japonicus similar to At2g46870: RAV-like B3 domain DNA binding protein	chr1.CM0105.86_at	0.322161	0.433803
Lotus japonicus similar to At1g01220: unknown protein	chr1.CM0105.9.1_at	0.110841	0.901782
Lotus japonicus similar to At1g01220: unknown protein	chr1.CM0105.9_at	0.297323	0.665551
Lotus japonicus similar to At1g01220: unknown protein	chr1.CM0105.9_s_at	0.732063	0.263923
Lotus japonicus similar to At2g46890: unknown protein	chr1.CM0105.91_at	-0.252894	0.219056
Lotus japonicus similar to At1g72300: leucine-rich receptor-like protein kinase, putative	chr1.CM0105.92_at	0.766722	0.345397
Lotus japonicus similar to At3g54770: RNA binding protein - like	chr1.CM0105.95_at	-0.309279	0.417642
Lotus japonicus similar to At1g17260: H+-transporting ATPase AHA10	chr1.CM0105.96_at	0.501258	0.807321
Lotus japonicus similar to At3g14360: unknown protein	chr1.CM0105.97_at	0.380152	0.215994
Lotus japonicus similar to At1g53730: LRR receptor-like protein kinase - like (SRF6)	chr1.CM0105.98_at	0.25321	0.469656
Lotus japonicus similar to At1g53750: 26S proteasome ATPase subunit	chr1.CM0105.99_at	-0.216406	0.385043
Lotus japonicus similar to At1g22050: known protein	chr1.CM0109.1_at	0.169634	0.609745
Lotus japonicus similar to At1g03010: hypothetical protein	chr1.CM0109.10.1_at	-0.253785	0.573345
Lotus japonicus similar to At1g02780: ribosomal protein like (L19)	chr1.CM0109.14_at	-0.564652	0.318909
Lotus japonicus similar to At1g03000: putative peroxisome assembly factor-2	chr1.CM0109.16_at	0.0427894	0.96574
Lotus japonicus similar to At3g62930: glutaredoxin -like protein	chr1.CM0109.18_at	-0.170248	0.780086
Lotus japonicus similar to Q9FYK6: (Q9FYK6) F21J9.24	Ljwgs_032782.1.1_at	2.26071	0.0415167
Lotus japonicus similar to At1g66950: ABC transporter, putative	Ljwgs_027501.1_at	2.25916	0.00596905
Lotus japonicus similar to At1g02780: ribosomal protein like (L19)	chr1.CM0109.23_at	-0.292253	0.355154
Lotus japonicus similar to At2g47880: putative glutaredoxin	chr1.CM0109.24_at	0.0784412	0.91291
Lotus japonicus similar to At3g62930: glutaredoxin -like protein	chr1.CM0109.26.1_at	-0.270688	0.904483
Lotus japonicus similar to At3g62940: unknown protein	chr1.CM0109.26_at	0.0388018	0.951115
Lotus japonicus similar to At3g62970: unknown protein	chr1.CM0109.3_at	0.128245	0.765664
Lotus japonicus similar to At1g09155: unknown protein	chr1.CM0109.31_at	-0.98713	0.325348
Lotus japonicus similar to At1g09155: unknown protein	chr1.CM0109.32_at	-1.90482	0.573558
Lotus japonicus similar to At5g27920: unknown protein	chr1.CM0109.33_at	0.0521505	0.624464
Lotus japonicus similar to At3g05620: putative pectinesterase	chr1.CM0109.35_s_at	-0.270101	0.661121
Lotus japonicus similar to At5g27860: putative protein	chr1.CM0109.39_at	-0.363186	0.379386
Lotus japonicus similar to At1g16470: 20S proteasome subunit PAB1	chr1.CM0109.4_at	-0.224715	0.534183
Lotus japonicus similar to At3g14420: glycolate oxidase like protein	Ljwgs_013523.1_at	2.25528	7.52078e-05
Lotus japonicus similar to At5g09640: carboxypeptidase like protein	chr6.CM0118.2_s_at	2.23967	0.0105366
Lotus japonicus similar to Q40980: (Q40980) PSHSP71.2	chr4.CM0179.57_at	2.23666	0.0403712
Lotus japonicus similar to O81117: (O81117) P450-DEPENDENT FATTY ACID HYDROXYLASE	chr1.CM0109.49_x_at	0.81738	0.0918974
Lotus japonicus similar to At3g62910: translation releasing factor RF-1 -like protein	chr1.CM0109.5_at	-0.281931	0.208042
Lotus japonicus similar to Q39856: (Q39856) EPOXIDE HYDROLASE (EC 3.3.2.3)	chr1.CM0109.53_at	0.00325854	0.999999
Lotus japonicus similar to At3g62900: putative protein	chr1.CM0109.7_at	0.226373	0.681408
Lotus japonicus similar to At3g62920: putative protein	chr1.CM0109.9_at	-0.508948	0.193286
Lotus japonicus similar to At4g39050: kinesin like protein	chr1.CM0113.2.1_at	0.284734	0.34475
Lotus japonicus similar to At2g21380: putative kinesin heavy chain	chr1.CM0113.2_at	0.107085	0.63641
Lotus japonicus similar to At1g01240: unknown protein	Ljwgs_061148.1_at	2.23562	0.00852292
Lotus japonicus similar to At4g39150: dnaJ-like protein	chr1.CM0113.22_at	-0.0346076	0.97288
Lotus japonicus similar to At4g34590: bZIP transcription factor ATB2 Atbzip11	chr1.CM0113.26_at	0.693462	0.103599
Lotus japonicus similar to At1g75540: zinc finger protein, putative	chr1.CM0113.3_at	-0.382594	0.1367
Lotus japonicus similar to At4g39170: unknown protein	chr1.CM0113.30.2_s_at	0.112473	0.456401
Lotus japonicus similar to At1g17930: unknown protein	chr1.CM0113.30_s_at	0.000309197	0.999999
Lotus japonicus similar to At4g39180: SEC14 - like protein	chr1.CM0113.31_at	0.0350595	0.76226
Lotus japonicus similar to At2g16370: dihydrofolate reductase-thymidylate synthase	chr1.CM0113.32_at	0.247455	0.364737
Lotus japonicus similar to Q9AVG9: (Q9AVG9) S-ADENOSYL-L-METHIONINE:SALICYLIC ACID CARB	chr1.CM0113.33_at	0.033125	0.998426
Lotus japonicus similar to Q9FRU2: (Q9FRU2) NITRATE TRANSPORTER NRT1-5 (FRAGMENT)	chr4.CM0170.1.1_at	2.23429	0.00195228
Lotus japonicus similar to At2g21580: 40S ribosomal protein S25	chr1.CM0113.38_at	-0.460961	0.15441
Lotus japonicus similar to At2g21580: 40S ribosomal protein S25	chr1.CM0113.38_x_at	-0.521801	0.120051
Lotus japonicus similar to Q9LSZ4: (Q9LSZ4) SIMILARITY TO SGP1 MONOMERIC G-PROTEIN	Ljwgs_071133.1_at	2.22994	0.0265195
Lotus japonicus similar to At2g17080: hypothetical protein	chr1.CM0113.42_at	0.0126773	0.958296
Lotus japonicus similar to At5g18620: chromatin remodelling complex ATPase chain ISWI -like protein	chr1.CM0113.43.1_at	0.259626	0.500235
Lotus japonicus similar to At4g34560: unknown protein	chr1.CM0113.44.1_at	0.317782	0.366484
Lotus japonicus similar to Q9FS02: (Q9FS02) CYSTEINE PROTEINASE PRECURSOR	chr1.CM0113.44_at	-0.0417587	0.914266
Lotus japonicus similar to Q9XG83: (Q9XG83) GA 2-OXIDASE	chr1.CM0113.49_at	0.7676	0.117471
Lotus japonicus similar to At2g21590: putative ADP-glucose pyrophosphorylase large subunit	chr1.CM0113.51.1_at	0.903285	0.202092
Lotus japonicus similar to Q43819: (Q43819) ADP-GLUCOSE SYNTHETASE PRECURSOR (EC 2.7.7.	chr1.CM0113.51_at	0.758309	0.387713
Lotus japonicus similar to At4g39220: AtRer1A	chr1.CM0113.52.2_at	-0.0755733	0.888509
Lotus japonicus similar to Q9SBW1: (Q9SBW1) PUTATIVE TRANSCRIPTION FACTOR X2	chr1.CM0113.52_at	0.00240857	0.999999
Lotus japonicus similar to At4g38580: farnesylated protein (ATFP6)	chr1.CM0113.53_at	0.606689	0.783308
Lotus japonicus similar to At1g58180: carbonic anhydrase like protein	Ljwgs_132965.1_at	2.21205	0.00544599
Lotus japonicus similar to At4g37420: putative protein	chr1.CM0113.55_at	-0.013859	0.986095
Lotus japonicus similar to At5g51070: Erd1 protein precursor (sp|P42762)	Ljwgs_034704.1_at	2.19191	0.00890137
Lotus japonicus similar to At1g20693: unknown protein	chr1.CM0113.57_at	-0.0696868	0.884373
Lotus japonicus similar to At1g76680: 12-oxophytodienoate reductase (OPR1)	chr1.CM0113.58_at	0.289117	0.40846
Lotus japonicus similar to At1g16320: unknown protein	chr1.CM0113.6_at	0.469629	0.259713
Lotus japonicus similar to At3g25940: unknown protein	chr1.CM0113.62_at	-0.298727	0.48552
Lotus japonicus similar to Q9ZRZ4: (Q9ZRZ4) HB2 HOMEODOMAIN PROTEIN (FRAGMENT)	chr1.CM0113.66_at	0.483602	0.404903
Lotus japonicus similar to At1g73680: feebly-like protein	chr4.CM0042.112_at	2.17834	0.041232
Lotus japonicus similar to At1g20760: unknown protein	chr1.CM0113.70_at	-0.315	0.349836
Lotus japonicus similar to At1g76390: hypothetical protein	chr1.CM0113.71_at	0.202257	0.517605
Lotus japonicus similar to At5g42350: putative protein	chr1.CM0113.73_at	-0.596483	0.084066
Lotus japonicus similar to At1g20770: hypothetical protein	chr1.CM0113.74_at	0.0277313	0.995074
Lotus japonicus similar to At1g20760: unknown protein	chr1.CM0113.75.2_at	-0.0449285	0.990911
Lotus japonicus similar to At1g20760: unknown protein	chr1.CM0113.75_at	0.0614141	0.897213
Lotus japonicus similar to At1g42480: unknown protein	chr1.CM0113.77_at	-0.584317	0.0560219
Lotus japonicus similar to At5g50720: unknown protein	chr1.CM0063.42_s_at	2.17814	0.0208299
Lotus japonicus similar to At1g42540: hypothetical protein (AtGLR3.3)	chr1.CM0113.80_at	-0.28402	0.660168
Lotus japonicus similar to At1g42970: putative glyceraldehyde-3-phosphate dehydrogenase (At1g42970)	chr1.CM0113.81_at	-0.35964	0.150929
Lotus japonicus similar to At3g42100: putative protein	chr1.CM0117.18.1_s_at	0.116117	0.966749
Lotus japonicus similar to At3g30560: hypothetical protein	chr1.CM0117.18_s_at	0.0237181	0.918293
Lotus japonicus similar to At4g02600: AtMlo-h1-like protein	chr1.CM0117.2.1_at	0.327727	0.228095
Lotus japonicus similar to At4g19810: putative chitinase	CM0345.41_s_at	2.17386	0.0422463
Lotus japonicus similar to At5g17310: UDP-glucose pyrophosphorylase	chr1.CM0117.22.3_at	-0.222112	0.305066
Lotus japonicus similar to At3g06980: putative DEAD DEAH box helicase	chr1.CM0117.22_s_at	-0.337524	0.182432
Lotus japonicus similar to At2g43030: 50S ribosomal protein L3	chr1.CM0117.24.1_at	-0.631545	0.108852
Lotus japonicus similar to At2g21970: unknown protein	Ljwgs_093198.1_at	2.16913	0.00498955
Lotus japonicus similar to Q9AYK3: (Q9AYK3) PUTATIVE REPLICATION FACTOR	chr1.CM0117.26_at	0.00284631	0.999817
Lotus japonicus similar to At4g36900: TINY-like protein	Ljwgs_134387.1_at	2.16269	0.0215526
Lotus japonicus similar to At4g02600: AtMlo-h1-like protein	chr1.CM0117.27_at	0.0910176	0.914694
Lotus japonicus similar to At2g44270: unknown protein	chr1.CM0117.28_at	0.431267	0.20436
Lotus japonicus similar to At2g44270: unknown protein	chr1.CM0117.28_s_at	0.131806	0.676771
Lotus japonicus similar to At1g08540: plastid RNA polymerase sigma-subunit (SIG1)	chr1.CM0117.29.1_at	-0.383152	0.137043
Lotus japonicus similar to At2g19260: unknown protein	chr1.CM0117.29.3_at	0.364839	0.164958
Lotus japonicus similar to At5g22800: alanyl-tRNA synthetase	chr1.CM0117.29.4_at	-0.0802461	0.893914
Lotus japonicus similar to At2g39890: proline transporter 1	Ljwgs_021753.1_at	2.16173	0.0157556
Lotus japonicus similar to At5g19340: putative protein	BM1271.4_at	2.13093	0.0010599
Lotus japonicus similar to At4g35250: unknown protein	chr1.CM0117.33.1_at	-0.561	0.095629
Lotus japonicus similar to P94084: (P94084) CLASS I CHITINASE	chr1.CM0117.33_at	-0.0204128	0.989109
Lotus japonicus similar to Q9LMA1: (Q9LMA1) T29M8.12 PROTEIN	chr1.CM0117.34_at	0.639603	0.29727
Lotus japonicus similar to At4g38360: unknown protein	chr1.CM0117.36_at	0.181006	0.574142
Lotus japonicus similar to Q9N9M3: (Q9N9M3) POSSIBLE PROGRAMMED CELL DEATH PROTEIN, COP	chr1.CM0117.37_at	0.161979	0.759391
Lotus japonicus similar to At1g76310: putative G2 mitotic-specific cyclin 1 (B-like cyclin)	chr1.CM0117.38_at	-0.487189	0.10286
Lotus japonicus similar to At4g35280: putative zinc-finger protein	chr1.CM0117.40.1_at	-0.00338897	0.998487
Lotus japonicus similar to At2g45250: unknown protein	chr1.CM0117.40_at	-0.0301158	0.982747
Lotus japonicus similar to At4g38240: glycosyltransferase like protein	chr1.CM0117.45_at	-0.127081	0.610988
Lotus japonicus similar to At3g26910: unknown protein	chr1.CM0117.49_at	-0.00162463	0.999999
Lotus japonicus similar to At1g08230: unknown protein	chr3.CM0701.24_at	2.12343	0.000123271
Lotus japonicus similar to At2g05170: unknown protein	chr1.CM0117.53_s_at	0.32873	0.103304
Lotus japonicus similar to At2g05170: unknown protein	chr1.CM0117.55.1_at	0.195816	0.662465
Lotus japonicus similar to At1g66740: putative protein	chr1.CM0117.7_at	-0.578555	0.222847
Lotus japonicus similar to At3g24503: aldehyde dehydrogenase	chr1.CM0121.13.1_s_at	0.0011724	0.999999
Lotus japonicus similar to Q9FSJ7: (Q9FSJ7) PUTATIVE NUCLEOTIDE-BINDING PROTEIN	chr1.CM0121.20_s_at	0.253202	0.32545
Lotus japonicus similar to At3g42100: putative protein	chr1.CM0121.33_x_at	0.0361188	0.857797
Lotus japonicus similar to At4g07330:	chr1.CM0121.34_at	0.671555	0.129023
Lotus japonicus similar to At4g07330:	chr1.CM0121.34_s_at	0.307297	0.482684
Lotus japonicus similar to At4g07330:	chr1.CM0121.34_x_at	0.475628	0.193602
Lotus japonicus similar to At3g05140: putative serine threonine protein kinase	chr5.CM0211.27_at	2.11575	0.0227978
Lotus japonicus similar to At1g20340: Plastocyanin (PetE2)	chr1.CM0121.36_at	-0.413516	0.204998
Lotus japonicus similar to At4g35790: phospholipase D (AtPLDdelta)	chr1.CM0121.37_at	-0.0260963	0.932924
Lotus japonicus similar to At4g01680: putative transcription factor	chr1.CM0122.0.1_at	0.071719	0.632083
Lotus japonicus similar to At4g01680: putative transcription factor	chr1.CM0122.0.1_x_at	0.017203	0.959098
Lotus japonicus similar to At1g09540: putative transcription factor (MYB61)	chr1.CM0122.1_at	-0.00839975	0.999817
Lotus japonicus similar to Q43322: (Q43322) CHITINASE (EC 3.2.1.14) (CHITODEXTRINASE) (	chr1.CM0122.11_s_at	0.0895503	0.830249
Lotus japonicus similar to At4g01720: putative DNA-binding protein	chr1.CM0122.12_at	0.731971	0.15391
Lotus japonicus similar to At3g62120: multifunctional aminoacyl-tRNA ligase-like protein	chr1.CM0122.13.1_at	-0.472066	0.0846935
BP083651 Lotus japonicus roots Lotus corniculatus var. japonicus cDNA clone MR100d10_f 3 , mRNA sequence reverse complement	gi45640312_at	2.11415	0.00766631
Lotus japonicus similar to At3g62110: unknown protein	chr1.CM0122.13_at	-0.547338	0.189949
Lotus japonicus similar to At4g01810: protein transport factor like protein	chr1.CM0122.15_at	-0.489365	0.120051
Lotus japonicus similar to At3g62140: hypothetical protein	chr1.CM0122.16_at	0.551277	0.0700527
Lotus japonicus similar to At3g62140: hypothetical protein	chr1.CM0122.16_s_at	0.109855	0.891757
Lotus japonicus similar to At3g62080: unknown protein	chr1.CM0122.2_at	0.649044	0.0595322
Lotus japonicus similar to At4g01840: potassium channel like protein	chr1.CM0122.20_at	0.0114418	0.994393
Lotus japonicus similar to At2g47020: putative peptide chain release factor	chr1.CM0122.21.1_at	-0.0881604	0.828245
Lotus japonicus similar to At2g47020: putative peptide chain release factor	chr1.CM0122.21_at	0.0841047	0.681098
Lotus japonicus similar to At1g50830: hypothetical protein	chr1.CM0122.22_x_at	0.0226192	0.943456
Lotus japonicus hypothetical protein	chr1.CM0122.26_at	-0.00427173	0.998425
Lotus japonicus hypothetical protein	chr1.CM0122.26_x_at	0.0232853	0.87261
Lotus japonicus similar to At1g09530: putative transcription factor BHLH8	chr1.CM0122.3_at	0.0537819	0.977902
Lotus japonicus similar to At1g09530: putative transcription factor BHLH8	chr1.CM0122.3_s_at	0.464056	0.409207
Lotus japonicus similar to At3g62190: unknown protein	chr1.CM0122.31_at	0.347202	0.263599
Lotus japonicus similar to At3g17430: unknown protein	chr1.CM0122.32_at	-0.549168	0.222116
Lotus japonicus similar to At2g47060: putative protein kinase	chr1.CM0122.34_at	0.149956	0.392976
Lotus japonicus similar to At3g60030: squamosa promoter binding protein-like 12	chr1.CM0122.36_at	-0.0318603	0.977855
Lotus japonicus similar to At4g01850: S-adenosylmethionine synthase 2	chr1.CM0122.38_at	0.169679	0.591309
Lotus japonicus similar to At4g14350: protein kinase	chr1.CM0122.41.1_s_at	0.145404	0.859906
Lotus japonicus similar to At2g47140: alcohol dehydrogenase like protein	chr1.CM0122.41.2_at	-0.0291033	0.804076
Lotus japonicus similar to At5g26751: shaggy-like kinase alpha	chr1.CM0122.43_at	-0.209663	0.362671
Lotus japonicus similar to At2g47160: putative anion exchange protein	chr1.CM0122.46_at	-0.447332	0.479158
Lotus japonicus similar to At4g01897: unknown protein	chr1.CM0122.50_at	-0.0704701	0.915669
Lotus japonicus similar to Q9ARI4: (Q9ARI4) PII PROTEIN	chr1.CM0122.51_at	-0.913964	0.0527284
Lotus japonicus similar to At1g58180: carbonic anhydrase like protein	Ljwgs_107406.0.1_at	2.11295	0.00455251
Lotus japonicus similar to At1g06720: unknown protein	chr1.CM0122.54_at	-0.566926	0.152841
Lotus japonicus similar to At2g47240: putative acyl-CoA synthetase	chr1.CM0122.57_at	-1.82577	0.422615
Lotus japonicus similar to At2g35030: hypothetical protein	chr1.CM0122.58_at	6.55409e-05	0.999999
Lotus japonicus similar to At2g47240: putative acyl-CoA synthetase	chr1.CM0122.60_at	0.0760921	0.979767
Lotus japonicus hypothetical protein	chr1.CM0122.61.1_s_at	-0.0143601	0.983702
Lotus japonicus similar to At2g47210: unknown protein	chr1.CM0122.61_at	0.538163	0.105112
Lotus japonicus similar to At2g47240: putative acyl-CoA synthetase	chr1.CM0122.62_at	0.0715919	0.904826
Lotus japonicus similar to At4g01940: putative NifU-like metallocluster assembly factor	chr1.CM0122.63_at	0.144331	0.736363
Lotus japonicus similar to At2g47240: putative acyl-CoA synthetase	chr1.CM0122.64_at	-0.945371	0.155774
Lotus japonicus similar to At2g47240: putative acyl-CoA synthetase	chr1.CM0122.64_x_at	-0.826729	0.280951
Lotus japonicus similar to At2g47210: unknown protein	chr1.CM0122.71_at	-0.149811	0.576689
Lotus japonicus similar to At3g62310: ATP-dependent RNA helicase-like protein	chr1.CM0122.72_at	-0.384972	0.304202
Lotus japonicus similar to C824_SOYBN: (O49859) CYTOCHROME P450 82A4 (EC 1.14.-.-) (P45	Ljwgs_099719.2_at	2.1108	0.000149264
Lotus japonicus similar to At3g62330: unknown protein	chr1.CM0122.74_at	0.0284866	0.93935
Lotus japonicus hypothetical protein	chr1.CM0122.78.2_at	0.0381802	0.739532
Lotus japonicus similar to At1g77920: bZip transcription factor AtbZip50	Ljwgs_080719.1_at	2.10711	0.0122059
Lotus japonicus similar to At1g77860: hypothetical protein	chr1.CM0122.81.1_at	0.0393507	0.678871
Lotus japonicus similar to At1g07510: unknown protein	chr1.CM0122.82_at	-0.112234	0.570596
Lotus japonicus hypothetical protein	chr1.CM0122.85.1_at	0.299504	0.480435
Lotus japonicus similar to At2g47240: putative acyl-CoA synthetase	chr1.CM0122.85.2_at	0.0203367	0.993308
Lotus japonicus similar to At4g08290: nodulin-like protein	Ljwgs_054944.1_at	2.10375	0.00012427
Lotus japonicus similar to At5g62550: unknown protein	chr1.CM0123.27_at	-2.11498	0.088021
Lotus japonicus similar to At2g36390: starch branching enzyme class II (sbe2-1)	chr1.CM0178.37_at	2.10234	0.00105146
Lotus japonicus similar to At5g15130: unknown protein	chr1.CM0123.35.1_at	-0.00390988	0.995733
Lotus japonicus hypothetical protein	chr1.CM0123.38_at	0.0142903	0.937037
Lotus japonicus hypothetical protein	chr1.CM0123.38_s_at	0.0176241	0.966275
Lotus japonicus similar to Q9V3T8: (Q9V3T8) SC35 PROTEIN	chr1.CM0123.39.1_at	-0.011311	0.995366
Lotus japonicus similar to At5g62740: unknown protein	chr1.CM0123.57_at	-0.219339	0.701593
Lotus japonicus similar to At1g74690: unknown protein	chr1.CM0123.6_at	-0.96661	0.197081
Lotus japonicus hypothetical protein	chr1.CM0123.61.2_at	0.250281	0.586385
Lotus japonicus similar to At5g27680: unknown protein	chr1.CM0125.14_at	0.0939359	0.904886
Lotus japonicus hypothetical protein	chr1.CM0125.22_at	-0.0194348	0.999999
Lotus japonicus similar to Q9FXC7: (Q9FXC7) F12A21.25	chr1.CM0125.24_at	-0.0330983	0.753449
Lotus japonicus similar to At5g10020: receptor protein kinase -like(fragment)	chr1.CM0125.25_at	-0.166537	0.848302
Lotus japonicus similar to At1g35940: hypothetical protein	chr1.CM0133.1.1_s_at	-0.0355524	0.71461
Lotus japonicus similar to At3g11410: protein phosphatase 2C (PP2C)	Ljwgs_026318.1_at	2.09871	0.0140012
Lotus japonicus similar to At5g59840: GTP-binding protein ara-3	chr1.CM0133.16_at	-0.00565829	0.989846
Lotus japonicus similar to At2g24720: putative ligand-gated ion channel protein (AtGLR2.2)	chr1.CM0133.17_at	0.799306	0.229141
Lotus japonicus hypothetical protein	chr1.CM0133.20_at	-0.00260855	0.999999
Lotus japonicus similar to At2g29120: glutamate receptor like protein	chr1.CM0133.21_at	0.00982174	0.999999
Lotus japonicus similar to At5g27100: ion channel - like protein (AtGLR2.1)	chr1.CM0133.24_s_at	-0.628169	0.504945
Lotus japonicus similar to At2g24640: putative ubiquitin carboxyl terminal hydrolase	chr1.CM0133.28_at	0.10594	0.741768
Lotus japonicus similar to At4g33160: unknown protein	chr1.CM0133.29_at	-0.241156	0.678408
Lotus japonicus similar to At5g45775: ribosomal protein L11-like	chr1.CM0133.30_at	-0.00162849	0.999999
Lotus japonicus hypothetical protein	chr1.CM0133.36.1_at	3.24267	0.606662
Lotus japonicus similar to At5g21280: putative protein	chr1.CM0133.36_at	-0.0602358	0.957346
Lotus japonicus similar to At2g26250: beta-ketoacyl-CoA synthase (FIDDLEHEAD)	chr1.CM0133.38_at	-0.651097	0.328814
Lotus japonicus similar to At5g21970: unknown protein	chr1.CM0133.40_at	-0.15573	0.526297
Lotus japonicus similar to At2g45700: unknown protein	chr1.CM0133.46_at	-0.537459	0.347718
Lotus japonicus similar to At2g26260: 3-beta-hydroxysteroid dehydrogenase	chr1.CM0133.48_at	-0.346335	0.143582
Lotus japonicus similar to At4g33710: pathogenesis-related protein 1 precursor, 18.9K	chr1.CM0133.49_x_at	0.211323	0.338821
Lotus japonicus similar to At5g27640: TRANSLATION INITIATION FACTOR 3 SUBUNIT 9-like protein	chr1.CM0133.52_at	-0.515878	0.0620862
Lotus japonicus similar to At2g26270: hypothetical protein	chr1.CM0133.53_at	-0.0431474	0.98198
Lotus japonicus similar to At3g43920: putative protein	chr1.CM0133.54.1_at	0.451811	0.275561
Lotus japonicus similar to At3g43920: putative protein	chr1.CM0133.54.2_at	-0.032056	0.717855
Lotus japonicus similar to At3g43920: putative protein	chr1.CM0133.54_at	0.176839	0.853507
Lotus japonicus similar to At2g26280: unknown protein	chr1.CM0133.58_at	0.266036	0.47356
Lotus japonicus similar to At5g20650: unknown protein	chr1.CM0133.59_at	0.503324	0.0507781
Lotus japonicus similar to At5g61430: NAM, no apical meristem, - like protein	chr4.CM0087.91_at	2.09348	0.00109487
Lotus japonicus similar to At3g43920: putative protein	chr1.CM0133.62.1_at	0.0495801	0.817666
Lotus japonicus similar to At4g33170: putative protein	chr1.CM0133.62_at	-0.033938	0.742676
Lotus japonicus similar to At2g05940: putative protein kinase	chr1.CM0133.64.1_at	0.0344516	0.804263
Lotus japonicus similar to At1g21170: unknown protein, 3 partial	chr1.CM0133.64_x_at	0.178857	0.460506
Lotus japonicus similar to At1g15740: putative leucine rich protein	Ljwgs_070861.1_at	2.08342	0.000805957
Lotus japonicus similar to At5g15500: unknown protein	chr1.CM0133.7_at	0.00523531	0.999999
Lotus japonicus similar to At3g43860: cellulase like protein	chr1.CM0133.72_at	-0.0177143	0.983504
Lotus japonicus similar to At5g21940: unknown protein	chr1.CM0133.75_at	0.0330247	0.998471
Lotus japonicus similar to At5g21930: metal-transporting ATPase - like protein	chr1.CM0133.80_at	0.405833	0.141446
Lotus japonicus similar to At3g06080: unknown protein	chr6.CM0139.57_at	2.07763	0.0131743
Lotus japonicus similar to At5g27640: TRANSLATION INITIATION FACTOR 3 SUBUNIT 9-like protein	chr1.CM0133.83_at	0.146495	0.765088
Lotus japonicus similar to At5g27640: TRANSLATION INITIATION FACTOR 3 SUBUNIT 9-like protein	chr1.CM0133.83_x_at	0.193766	0.648883
Lotus japonicus similar to At2g17220: protein kinase like protein	chr4.CM0244.72_s_at	2.06692	0.000564478
Lotus japonicus hypothetical protein	Ljwgs_012293.0.1_at	2.04599	0.00885003
Lotus japonicus hypothetical protein	chr1.CM0133.86_at	-0.553067	0.152609
Lotus japonicus similar to At2g06520: unknown protein	chr1.CM0133.88_at	-0.373817	0.152955
Lotus japonicus similar to At5g12080: putative protein	chr1.CM0133.89.1_s_at	0.375311	0.56869
Lotus japonicus similar to At3g29010: hypothetical protein	chr1.CM0141.12.1_at	0.287181	0.513014
Lotus japonicus similar to At3g29010: hypothetical protein	chr1.CM0141.12.1_x_at	0.117771	0.8073
Lotus japonicus similar to At3g28970: unknown protein	chr1.CM0141.12.3_at	-0.316026	0.291034
Lotus japonicus similar to At3g28970: unknown protein	chr1.CM0141.12.4_at	0.382199	0.130877
Lotus japonicus similar to At5g20200: Unknown protein	chr1.CM0141.12_at	-0.0136381	0.997891
Lotus japonicus hypothetical protein	chr1.CM0141.14.1_at	0.469423	0.45527
Lotus japonicus similar to At5g50390: selenium-binding protein-like	chr1.CM0141.16.1_at	-0.295161	0.439942
Lotus japonicus similar to UGS3_PEA: (Q43093) GLYCOGEN [STARCH] SYNTHASE PRECURSOR (EC	chr1.CM0141.16_at	-0.32338	0.831189
Lotus japonicus similar to Q9FRU2: (Q9FRU2) NITRATE TRANSPORTER NRT1-5 (FRAGMENT)	chr4.CM0170.9_at	2.0454	0.00131592
Lotus japonicus similar to At1g32450: peptide transporter PTR2-B, putative	chr1.CM0141.2_at	-0.0949144	0.997493
Lotus japonicus similar to At3g01180: putative glycogen synthase	chr1.CM0141.21_at	-0.0942644	0.957353
Lotus japonicus similar to Q9MBG4: (Q9MBG4) LIPOATE PROTEIN LIGASE-LIKE PROTEIN	chr1.CM0141.25_at	-0.312704	0.390806
Lotus japonicus similar to At1g01240: unknown protein	Ljwgs_032260.1_at	2.04322	4.05481e-05
Lotus japonicus similar to At3g01150: polypyrimidine tract-binding protein like	chr1.CM0141.27_at	-0.216475	0.211714
Lotus japonicus similar to At5g15270: putative protein	chr1.CM0141.30_at	-0.186698	0.785302
Lotus japonicus similar to At5g15290: unknown protein	chr1.CM0141.31_at	0.203782	0.620038
Lotus japonicus similar to At5g15300: unknown protein	chr1.CM0141.32_at	0.0399062	0.783991
Lotus japonicus similar to Q02992: (Q02992) MYB-PH1 PROTEIN	chr1.CM0141.34_at	0.128037	0.926973
Lotus japonicus similar to At5g59010: protein kinase - like	chr1.CM0141.39_x_at	0.0636733	0.683064
Lotus japonicus similar to At3g07720: unknown protein	TM1490.2_at	2.0415	0.0013742
Lotus japonicus similar to At3g01100: unknown protein	chr1.CM0141.45.1_at	0.00615386	0.986698
Lotus japonicus similar to At3g01100: unknown protein	chr1.CM0141.45.3_at	-0.00595362	0.990293
Lotus japonicus similar to At3g29060: unknown protein	chr1.CM0141.48_at	-0.484313	0.63066
Lotus japonicus similar to At3g29060: unknown protein	chr1.CM0141.49_at	-0.231453	0.715645
Lotus japonicus similar to At5g39670: calcium-binding protein - like	chr1.CM0141.5_at	0.721283	0.515097
Lotus japonicus similar to At3g03900: putative adenylylsulfate kinase	chr1.CM0141.51_at	0.0546722	0.567153
Lotus japonicus similar to Q9XF25: (Q9XF25) SNF-1-LIKE SERINE THREONINE PROTEIN KINASE	chr1.CM0141.53_s_at	0.371728	0.40967
Lotus japonicus similar to At3g29100: putative vesicle transport protein	chr1.CM0141.57.2_at	0.0510654	0.963028
Lotus japonicus similar to At3g29090: pectinesterase like protein	chr1.CM0141.58_at	-0.00938458	0.998808
Lotus japonicus similar to At2g19810: putative CCCH-type zinc finger protein	chr4.CM0004.18_at	2.03708	0.00841829
Lotus japonicus similar to At3g01180: putative glycogen synthase	chr1.CM0141.6.1_at	-0.20995	0.886601
Lotus japonicus similar to At5g39510: v-SNARE AtVTI1a	chr1.CM0141.63_at	-0.0055303	0.990612
Lotus japonicus similar to At1g48830: unknown protein	chr1.CM0141.65_at	0.211539	0.408527
Lotus japonicus similar to At3g01110: hypothetical protein	chr1.CM0141.68.1_at	-0.0221459	0.872089
Lotus japonicus similar to At3g29180: unknown protein	chr1.CM0141.69_at	-0.00433737	0.994793
Lotus japonicus similar to At5g50390: selenium-binding protein-like	chr1.CM0141.8.1_at	-0.0717718	0.952388
Lotus japonicus similar to At5g39660: unknown protein	chr1.CM0141.9_at	0.379279	0.419182
Lotus japonicus similar to At5g59720: heat shock protein 18	chr1.CM0145.12_at	0.268542	0.275133
Lotus japonicus similar to At4g02120: CTP synthase - like protein	chr1.CM0145.14_at	-0.0325017	0.993536
Lotus japonicus similar to At5g49980: transport inhibitor response 1 protein	chr1.CM0145.19_at	-0.422838	0.465747
Lotus japonicus similar to At5g01340: unknown protein	chr1.CM0145.20_at	-0.54165	0.13502
Lotus japonicus hypothetical protein	chr1.CM0145.21_x_at	-0.173199	0.981525
<not provided>	TC8471_at	2.03609	0.00500575
Lotus japonicus similar to At1g28210: AtJ1 (atj)	chr1.CM0145.28_at	-0.164125	0.797809
Lotus japonicus similar to Q9LM14: (Q9LM14) F16L1.9 PROTEIN	chr1.CM0192.50_at	2.03578	0.00212256
Lotus japonicus similar to At4g05510:	chr1.CM0145.32.1_at	0.0133362	0.944141
Lotus japonicus similar to At2g36690: putative giberellin beta-hydroxylase	chr1.CM0145.40_at	-0.194539	0.852883
Lotus japonicus similar to PUR7_VIGAC: (Q07463) PHOSPHORIBOSYLAMIDOIMIDAZOLE-SUCCINOCAR	chr1.CM0145.43.1_at	0.0488291	0.993713
Lotus japonicus similar to PUR7_VIGAC: (Q07463) PHOSPHORIBOSYLAMIDOIMIDAZOLE-SUCCINOCAR	chr1.CM0145.43_at	-0.0393584	0.8885
Lotus japonicus similar to At4g24660: unknown protein	chr1.CM0145.7_at	-0.64164	0.464901
Lotus japonicus hypothetical protein	chr1.CM0145.9_x_at	-0.0380652	0.913072
Lotus japonicus similar to At5g02040: unknown protein	chr1.CM0147.101.2_at	0.295661	0.135806
Lotus japonicus similar to At5g02050: unknown protein	chr1.CM0147.101_at	-0.351427	0.420538
Lotus japonicus similar to At5g28470: peptide transporter - like protein	chr1.CM0147.105_at	0.108626	0.796579
Lotus japonicus similar to At1g52250: unknown protein	chr1.CM0147.107_at	0.51851	0.0580682
Lotus japonicus similar to At3g53970: unknown protein	chr1.CM0147.112_at	0.215572	0.476074
Lotus japonicus similar to At5g02030: putative homeodomain protein	chr1.CM0147.119_at	0.088315	0.954548
Lotus japonicus similar to At3g46510: arm repeat containing protein homolog	chr1.CM0147.12_at	0.0195336	0.919596
BP031279 Lotus corniculatus var. japonicus flower Lotus corniculatus var. japonicus cDNA clone MF057b10_f 3 , mRNA sequence reverse complement	gi45408439_at	2.03258	0.0170875
Lotus japonicus similar to At5g02020: unknown protein	chr1.CM0147.122_at	0.24282	0.716442
Lotus japonicus similar to At5g59840: GTP-binding protein ara-3	chr1.CM0147.2.1_at	-0.116131	0.698884
Lotus japonicus similar to At5g54530: unknown protein	chr1.CM0147.2_x_at	0.333047	0.443623
Lotus japonicus similar to Q41103: (Q41103) PVALF	chr1.CM0147.20.1_at	0.130886	0.414022
Lotus japonicus similar to At3g09430: hypothetical protein	chr1.CM0147.24_at	-0.061818	0.612968
Lotus japonicus similar to At2g37670: putative WD-40 repeat protein	chr1.CM0147.25_at	-0.0078325	0.996296
Lotus japonicus similar to At5g60020: laccase - like protein	chr1.CM0147.26_at	-0.75488	0.207643
Lotus japonicus similar to At5g60020: laccase - like protein	chr1.CM0147.26_s_at	-0.250344	0.69808
Lotus japonicus similar to At5g60020: laccase - like protein	chr1.CM0147.31_at	-0.133297	0.710725
AV778905 Lotus japonicus Pods (20-30 mm in length) Lotus corniculatus var. japonicus cDNA clone MPDL047h12_f 3 , mRNA sequence reverse complement	gi45402562_at	2.03127	0.0044306
Lotus japonicus similar to At5g60010: respiratory burst oxidase protein - like	chr1.CM0147.35_at	0.483145	0.146437
Lotus japonicus similar to At2g36840: unknown protein	TM1476.10.1_at	2.02917	0.000983892
Lotus japonicus similar to At1g79860: unknown protein	chr1.CM0147.39_s_at	-0.188629	0.691073
Lotus japonicus similar to At2g37580: putative RING zinc finger protein	chr1.CM0147.4_at	0.410978	0.578159
Lotus japonicus similar to At5g16420: salt-inducible protein-like	chr1.CM0147.40_at	0.0772901	0.836492
Lotus japonicus similar to At3g42100: putative protein	chr1.CM0147.44_x_at	0.0011769	0.999999
Lotus japonicus similar to At3g09420: putative pectinacetylesterase	chr1.CM0147.45_at	0.13921	0.904277
Lotus japonicus similar to At1g07630: unknown protein	chr1.CM0147.48_at	-0.0061236	0.986396
Lotus japonicus similar to At2g44310: unknown protein	chr1.CM0147.52_at	0.0864655	0.787391
Lotus japonicus similar to At3g12580: putative protein	chr1.CM0147.53_at	0.00356358	0.999999
Lotus japonicus similar to At3g56970: putative bHLH transcription factor (bHLH038)	chr1.CM0147.54_at	-0.817203	0.812015
Lotus japonicus similar to At1g24310: unknown protein	chr1.CM0147.58_at	-0.130964	0.893661
Lotus japonicus similar to At1g24310: unknown protein	chr1.CM0147.59.1_at	-0.121951	0.428244
Lotus japonicus similar to At5g02310: eceriferum3 (CER3)	chr1.CM0147.63.2_at	0.214999	0.255842
Lotus japonicus similar to At5g02300: ubiquitin-protein ligase E3-alpha -like protein	chr1.CM0147.63.3_at	0.27269	0.556434
Lotus japonicus similar to At5g02310: eceriferum3 (CER3)	chr1.CM0147.63.4_at	0.200552	0.33042
Lotus japonicus similar to At5g02300: ubiquitin-protein ligase E3-alpha -like protein	chr1.CM0147.64.1_at	-0.0197993	0.969025
Lotus japonicus similar to At5g02300: ubiquitin-protein ligase E3-alpha -like protein	chr1.CM0147.64_at	-0.016177	0.977298
Lotus japonicus similar to At1g09250: unknown protein	chr5.TM1598.10_at	2.02075	0.0427637
Lotus japonicus similar to Q9XEU0: (Q9XEU0) ZINC-FINGER PROTEIN 1	chr5.CM0200.109_at	2.01487	0.0278985
Lotus japonicus hypothetical protein	chr1.CM0147.7_x_at	0.00458939	0.99679
Lotus japonicus similar to At1g56010: NAC1	chr3.CM0279.50_at	2.00189	0.0194284
Lotus japonicus similar to Q9FNS1: (Q9FNS1) MYB-LIKE DNA-BINDING PROTEIN	chr1.CM0147.70_at	1.05536	0.0573004
Lotus japonicus similar to At2g27230: unknown protein	chr1.CM0147.72_at	0.466528	0.517075
Lotus japonicus similar to At1g05670: UDP glycosyltransferase UGT74E1	chr1.CM0147.74.1_at	0.269589	0.537779
Lotus japonicus similar to At5g02130: putative protein	chr1.CM0147.74_at	0.217672	0.655309
Lotus japonicus similar to At3g51630: MAP kinase like protein	Ljwgs_084246.1_at	1.98988	0.0111357
Lotus japonicus similar to At5g60020: laccase - like protein	chr1.CM0147.77_at	-0.0976509	0.872084
Lotus japonicus similar to At5g02100: unknown protein	chr1.CM0147.93_at	0.218256	0.842588
Lotus japonicus similar to At5g02070: putative protein kinase	chr1.CM0147.94_at	-0.0334587	0.960218
Lotus japonicus similar to At3g09140: hypothetical protein	chr1.CM0147.98_at	-0.00488647	0.992635
Lotus japonicus similar to At4g31500: cytochrome P450 monooxygenase (CYP83B1)	chr6.TM1091.15_at	1.98903	0.0360928
Lotus japonicus similar to At1g20830: unknown protein	chr1.CM0150.12_at	-0.54436	0.0672638
Lotus japonicus similar to At4g35300: sugar transporter like protein	chr1.CM0150.13_at	-0.00249436	0.999999
Lotus japonicus similar to At1g20823: ring-H2 finger like protein	chr1.CM0150.14.1_at	0.517653	0.178761
Lotus japonicus similar to At2g22250: putative aspartate aminotransferase	chr6.TM0306.12_at	1.98858	0.0277446
Lotus japonicus similar to Q9FT21: (Q9FT21) PUTATIVE GLUTATHIONE S-TRANSFERASE T3	Ljwgs_013237.1_at	1.98193	4.7143e-05
Lotus japonicus similar to At4g21320: putative protein	chr4.TM1616.10.2_at	1.98021	0.0305874
Lotus japonicus similar to At2g33690: hypothetical protein	chr1.CM0150.21.1_at	0.0053344	0.998085
Lotus japonicus similar to At1g76420: unknown protein	chr1.CM0150.26_at	0.409979	0.301931
Lotus japonicus similar to At3g20300: unknown protein	TM0721.12_at	1.97499	0.00605617
Lotus japonicus similar to At1g59960: putative protein	TM1614.14.1_at	1.97066	0.0112691
Lotus japonicus similar to C823_SOYBN: (O49858) CYTOCHROME P450 82A3 (EC 1.14.-.-) (P45	Ljwgs_092286.1_at	1.95724	0.00313874
Lotus japonicus similar to At1g76450: unknown protein	chr1.CM0150.34.1_at	-0.37051	0.12902
Lotus japonicus similar to At1g56410: hypothetical protein	Ljwgs_052805.1_at	1.95457	0.0413123
Lotus japonicus similar to At3g59650: unknown protein	chr1.CM0150.34_s_at	-0.276201	0.223666
Lotus japonicus similar to At2g33610: putative SWI SNF complex subunit SW13	chr1.CM0150.35_at	-0.012172	0.997472
Lotus japonicus similar to At5g52450: unknown protein	Ljwgs_137333.1.1_at	1.95403	0.00818886
Lotus japonicus similar to At4g12050: putative DNA-binding protein	chr1.CM0150.40_at	0.13474	0.537266
Lotus japonicus similar to At1g76510: putative DNA-binding protein	chr1.CM0150.43_at	-0.0415626	0.9845
Lotus japonicus hypothetical protein	chr1.CM0150.56_s_at	0.02753	0.893624
Lotus japonicus similar to LE14_SOYBN: (P46519) DESICCATION PROTECTANT PROTEIN LEA14 HO	Ljwgs_046195.1_at	1.93294	0.0006228
Lotus japonicus similar to Q9FUP6: (Q9FUP6) SUSPENSOR-SPECIFIC PROTEIN	chr1.CM0150.65.2_at	-0.00888479	0.993728
Lotus japonicus hypothetical protein	chr1.CM0150.66_at	0.181414	0.27495
Lotus japonicus similar to At1g49270: hypothetical protein	chr1.CM0150.69_at	0.41595	0.321632
Lotus japonicus similar to At1g20850: putative cysteine proteinase	chr1.CM0150.7.1_s_at	-0.626163	0.105141
Lotus japonicus similar to At4g34450: Nonclathrin coat protein gamma - like protein	chr1.CM0150.72_at	-0.502014	0.0822455
Lotus japonicus similar to At4g34460: GTP binding protein beta subunit	chr1.CM0150.73_at	0.134801	0.673604
Lotus japonicus similar to At5g18910: protein kinase - like protein	Ljwgs_065613.1.1_s_at	1.93266	0.00325614
Lotus japonicus similar to At4g34500: serine threonine protein kinase like protein	chr1.CM0150.76.1_at	-0.655751	0.399511
Lotus japonicus similar to At5g01520: C3HC4 type Zinc RING finger like protein	TM0548.14.1_at	1.93195	0.0443664
Lotus japonicus similar to At3g44880: lethal leaf-spot 1 homolog Lls1	Ljwgs_031570.1_at	1.9294	0.00127883
Lotus japonicus similar to At3g02300: unknown protein	chr1.CM0163.18_at	0.0262222	0.96516
Lotus japonicus similar to At5g64430: unknown protein	chr6.CM0055.13_at	1.92474	0.00073165
Lotus japonicus similar to At3g29970: putative protein	chr1.CM0163.22.2_at	-0.00125944	0.999999
Lotus japonicus hypothetical protein	chr1.CM0163.28.1_at	0.191329	0.363715
Lotus japonicus similar to At3g23660: transport protein, putative	chr1.CM0163.37_s_at	-0.208557	0.710573
Lotus japonicus similar to At1g49490: hypothetical protein	chr1.CM0163.6_x_at	-0.632258	0.537335
Lotus japonicus similar to At1g62400: hypothetical protein	chr1.CM0166.26.1_at	0.512298	0.43433
Lotus japonicus similar to Q9FTM7: (Q9FTM7) HYPOTHETICAL 32.3 KDA PROTEIN	chr1.CM0166.26.2_at	0.211861	0.810876
Lotus japonicus similar to At1g27510: unknown protein, 3 partial	chr1.CM0166.36_at	0.405918	0.0750952
Lotus japonicus similar to At5g62820: unknown protein	chr1.CM0166.41_at	0.637444	0.103051
Lotus japonicus similar to At3g47990: unknown protein	chr1.CM0166.48_at	0.407698	0.505639
Lotus japonicus similar to O04648: (O04648) SIMILARITY TO A DNAJ-LIKE DOMAIN	chr1.CM0166.49_at	0.130384	0.897951
Lotus japonicus similar to At5g55660: putative protein	chr1.CM0166.9_at	0.0183076	0.894698
Lotus japonicus similar to At4g24670: putative alliin lyase	chr1.CM0171.23_at	-0.0456967	0.782511
Lotus japonicus similar to At3g04920: putative ribosomal protein s19 or s24	chr1.CM0171.24_at	-0.0134005	0.961045
Lotus japonicus similar to At5g40390: raffinose synthase -like protein	chr1.CM0171.29_at	-0.00887207	0.97156
Lotus japonicus similar to At4g34140: hypothetical protein	chr1.CM0171.31_at	0.181625	0.712167
Lotus japonicus similar to At3g54170: FKBP12 interacting protein (FIP37)	chr1.CM0171.32_at	0.245449	0.274932
Lotus japonicus similar to At5g52480: nodulin-like protein	chr1.CM0171.46_x_at	0.00156482	0.999999
Lotus japonicus similar to At2g05350: hypothetical protein	chr1.CM0171.48_s_at	0.158922	0.43881
Lotus japonicus similar to At5g50130: ribitol dehydrogenase-like	chr1.CM0171.50.2_at	-0.642081	0.322289
Lotus japonicus similar to At3g54170: FKBP12 interacting protein (FIP37)	chr1.CM0171.50_at	0.225854	0.514981
Lotus japonicus similar to At5g50130: ribitol dehydrogenase-like	chr1.CM0171.54_at	-0.562961	0.0813145
Lotus japonicus similar to At5g01600: ferritin 1 precursor	Ljwgs_113552.1_s_at	1.92052	0.000591965
Lotus japonicus similar to Q9FML5: (Q9FML5) GENOMIC DNA, CHROMOSOME 5, P1 CLONE:MDC12	chr1.CM0171.56_at	0.0252633	0.997103
Lotus japonicus similar to At1g17120: putative amino acid transporter	chr1.CM0171.59_at	0.0134061	0.995291
Lotus japonicus similar to At1g17100: SOUL-like protein	chr1.CM0171.60_at	0.130342	0.444043
Lotus japonicus similar to At3g23990: mitochondrial chaperonin hsp60	chr1.CM0171.64.1_at	0.111461	0.963422
Lotus japonicus similar to At1g59870: putative ABC transporter (At1g59870)	chr1.CM0171.64.2_at	-0.0552246	0.900897
Lotus japonicus similar to Q9FUV8: (Q9FUV8) PHLOEM SERPIN-1	chr1.CM0171.71.1_at	-0.0424019	0.674889
Lotus japonicus similar to At1g05990: calcium-binding protein, putative	chr1.CM0171.71_at	-0.18532	0.675179
Lotus japonicus similar to At1g05990: calcium-binding protein, putative	chr1.CM0171.71_s_at	0.279568	0.582129
Lotus japonicus similar to At1g30970: putative 11-zinc finger protein	chr1.CM0171.72_s_at	-0.180604	0.460839
Lotus japonicus similar to BAB44021: (BAB44021) P0684B02.8 PROTEIN	chr1.CM0171.80.1_at	0.19388	0.353319
Lotus japonicus similar to At5g17680: disease resistance protein RPP1-WsB - like protein	chr1.CM0174.1_at	0.227778	0.355756
Lotus japonicus similar to At3g48425: unknown protein	chr1.CM0174.12.1_at	-0.223121	0.655379
Lotus japonicus similar to At3g48425: unknown protein	chr1.CM0174.12.2_at	-0.598941	0.25836
Lotus japonicus similar to Q9AV16: (Q9AV16) HYPOTHETICAL 25.3 KDA PROTEIN	chr1.CM0174.12_at	-0.0181068	0.967677
Lotus japonicus similar to At5g63200: unknown protein	chr1.CM0174.16_at	0.0124926	0.99818
Lotus japonicus similar to At3g48380: unknown protein	chr1.CM0174.21_at	-0.20778	0.435256
Lotus japonicus similar to At4g24790: DNA polymerase III like protein	chr1.CM0174.22_at	0.0319656	0.99629
Lotus japonicus similar to At3g48425: unknown protein	chr1.CM0174.5.1_at	-0.435419	0.39867
Lotus japonicus similar to At3g48415: unknown protein	chr1.CM0174.5_at	-0.462709	0.268937
Lotus japonicus similar to At1g20650: unknown protein	chr1.CM0178.0.1_at	-0.0891954	0.264427
Lotus japonicus similar to At2g21660: glycine-rich RNA binding protein	chr1.CM0178.1_s_at	0.142807	0.871061
Lotus japonicus similar to At1g15740: putative leucine rich protein	Ljwgs_100987.1_at	1.91686	0.000526143
Lotus japonicus hypothetical protein	chr1.CM0178.103.1_x_at	-1.21633	0.201027
Lotus japonicus similar to At1g42440: unknown protein	chr1.CM0178.11.1_at	-0.224352	0.511782
Lotus japonicus similar to At1g42440: unknown protein	chr1.CM0178.11_at	-0.0419313	0.893118
Lotus japonicus hypothetical protein	chr1.CM0178.2_at	-0.0113809	0.946377
Lotus japonicus similar to At5g42310: maize crp1 protein-like	chr1.CM0178.25_at	0.430642	0.149253
Lotus japonicus similar to At5g42320: unknown protein	chr1.CM0178.26_at	0.455311	0.217448
Lotus japonicus similar to At5g07040: C3HC4-type RING zinc finger protein-like	Ljwgs_105843.1.1_s_at	1.91139	0.00216725
Lotus japonicus hypothetical protein	chr1.CM0178.30_at	0.0175364	0.902637
Lotus japonicus similar to At5g35800: putative protein	chr1.CM0178.35_x_at	-0.00272499	0.999999
Lotus japonicus similar to At5g67080: protein kinase-like protein	Ljwgs_023649.1_at	1.89993	0.021351
Lotus japonicus similar to At1g20650: unknown protein	chr1.CM0178.4_s_at	-0.827686	0.140947
Lotus japonicus similar to At4g35090: catalase	chr1.CM0178.40_at	0.22414	0.0726289
Lotus japonicus similar to At1g20640: unknown protein	chr1.CM0178.43_s_at	0.306609	0.272657
Lotus japonicus similar to At1g42470: Niemann-Pick C disease protein-like protein	chr1.CM0178.44_at	-0.428583	0.137647
Lotus japonicus similar to At1g79900: putative carnitine acylcarnitine translocase	chr3.CM0726.8_at	1.8998	0.00727882
Lotus japonicus similar to At1g47960: unknown protein	chr4.CM0333.15_at	1.88499	0.00300084
Lotus japonicus hypothetical protein	chr1.CM0178.53_at	0.00888788	0.966947
Lotus japonicus similar to At1g17020: SRG1-like protein	chr2.CM0124.28.1_at	1.87745	0.0197825
Lotus japonicus similar to At1g76270: putative auxin-independent growth promoter (At1g76270)	chr1.CM0178.7_at	-0.23155	0.746597
Lotus japonicus similar to At3g13250: hypothetical protein	chr1.CM0178.73_x_at	0.000958332	0.999999
Lotus japonicus similar to At1g19440: very-long-chain fatty acid condensing enzyme CUT1 like protein	chr1.CM0178.74_at	0.00571527	0.999817
Lotus japonicus similar to At2g21660: glycine-rich RNA binding protein	chr1.CM0178.79_at	0.253618	0.719136
Lotus japonicus similar to At3g09070: unknown protein	chr1.CM0178.85_at	-1.73787	0.0767962
Lotus japonicus similar to At1g51740: unknown protein	chr1.CM0178.87.1_at	0.669993	0.277856
Lotus japonicus similar to At1g51740: unknown protein	chr1.CM0178.87_s_at	0.0133272	0.999999
Lotus japonicus hypothetical protein	chr1.CM0178.92_at	0.0550461	0.922406
Lotus japonicus similar to At3g09050: unknown protein	chr1.CM0178.96_at	0.781239	0.0930685
Lotus japonicus similar to At2g05580: unknown protein	chr1.CM0181.1_at	0.00233122	0.999999
Lotus japonicus similar to At1g77380: amino acid permease AAP3	chr1.CM0181.13_at	-0.828748	0.110168
Lotus japonicus similar to At3g02890: unknown protein	chr1.CM0181.15_at	0.395803	0.222849
Lotus japonicus similar to At1g31100: hypothetical protein	chr1.CM0181.17_at	-0.00509179	0.991196
Lotus japonicus similar to Q39879: (Q39879) MITOTIC CYCLIN A2-TYPE	chr1.CM0181.2_at	-2.50326	0.0739579
Lotus japonicus similar to At2g01690: unknown protein	chr1.CM0181.21_at	0.220807	0.325855
Lotus japonicus similar to O04180: (O04180) PGE1 PROTEIN	chr1.CM0181.23_s_at	0.00109323	0.999999
Lotus japonicus similar to At1g21660: auxilin-like protein	chr1.CM0181.25_at	0.0503188	0.834593
Lotus japonicus similar to At1g21680: unknown protein	chr1.CM0181.3_s_at	0.0716406	0.956332
Lotus japonicus similar to AAK50091: (AAK50091) AT1G78070 F28K19_28	chr1.CM0192.13_at	0.843005	0.070252
Lotus japonicus hypothetical protein	chr1.CM0192.2_at	-0.00103754	0.999999
Lotus japonicus hypothetical protein	chr1.CM0192.22_x_at	-0.138039	0.425906
Lotus japonicus similar to At1g36070: unknown protein	chr1.CM0192.24.1_at	0.614082	0.270833
Lotus japonicus similar to At5g53000: PP2A regulatory subunit (TAP46)	chr1.CM0192.26.1_at	-0.00630416	0.996181
Lotus japonicus similar to At1g78070: unknown protein (At1g78070)	chr1.CM0192.26_at	0.30538	0.698573
Lotus japonicus similar to At3g13250: hypothetical protein	chr1.CM0192.34_x_at	0.437043	0.476261
Lotus japonicus similar to At2g23000: putative serine carboxypeptidase I	chr3.TM0984.6_at	1.87556	0.00195596
Lotus japonicus similar to At1g53160: squamosa promoter binding protein-like 4 (spl4)	chr3.CM0282.119_at	1.87296	0.000432007
Lotus japonicus similar to At1g22170: phosphoglycerate mutase like protein	chr1.CM0192.49_at	0.0546989	0.977274
Lotus japonicus similar to At2g32540: putative cellulose synthase	Ljwgs_037643.1_at	1.87034	0.000128895
BP067982 Lotus corniculatus var. japonicus nodulating root Lotus corniculatus var. japonicus cDNA clone GNf008g09 3 , mRNA sequence reverse complement	gi45624725_at	1.86793	0.010953
Lotus japonicus similar to Q9SZY5: (Q9SZY5) SAH7 PROTEIN	chr1.CM0192.63_at	-0.266967	0.345435
Lotus japonicus similar to At5g42520: unknown protein	chr1.CM0195.1_at	0.209796	0.541171
Lotus japonicus similar to At4g29860: putative protein	chr1.CM0195.12_at	0.275248	0.413555
Lotus japonicus similar to At1g64600: unknown protein	chr1.CM0195.13.1_at	0.0921857	0.409454
Lotus japonicus similar to At4g24160: unknown protein	chr1.CM0195.14_at	0.290409	0.428607
Lotus japonicus similar to At1g75640: receptor-like protein kinase, putative	chr1.CM0195.15_at	-0.0216343	0.854123
Lotus japonicus similar to At2g18100: unknown protein	chr1.CM0195.19_at	0.28956	0.459906
Lotus japonicus similar to At1g64600: unknown protein	chr1.CM0195.2_at	0.302471	0.324099
Lotus japonicus similar to At1g75550: hypothetical protein	chr1.CM0195.20_at	0.0274033	0.963983
Lotus japonicus similar to At3g54350: putative protein	chr1.CM0195.21_at	-0.0482168	0.871846
Lotus japonicus similar to At5g52470: fibrillarin homolog (Fbr1)	chr1.CM0195.22_s_at	-0.633808	0.130128
Lotus japonicus similar to At3g04820: unknown protein	chr1.CM0195.25_at	0.767465	0.441772
Lotus japonicus similar to At1g62280: unknown protein	chr1.CM0195.29_at	-0.0214906	0.999999
Lotus japonicus similar to At3g15200: hypothetical protein	chr1.CM0195.38_at	0.170569	0.851052
Lotus japonicus similar to At2g21410: putative vacuolar proton-ATPase subunit	chr1.CM0195.39_s_at	-0.00137022	0.999999
Lotus japonicus similar to At4g16310: hypothetical protein	chr1.CM0195.4.1_at	-0.148038	0.877261
Lotus japonicus similar to Q9FJT1: (Q9FJT1) GENOMIC DNA, CHROMOSOME 5, P1 CLONE:MIK19	chr1.CM0195.40_at	-0.0856991	0.662998
BP077293 Lotus japonicus roots Lotus corniculatus var. japonicus cDNA clone MR017f09_f 3 , mRNA sequence reverse complement	gi45633954_at	1.86557	0.0111357
Lotus japonicus similar to At1g75510: transcription initiation factor, putative	chr1.CM0195.44_at	0.522647	0.0812324
Lotus japonicus similar to At5g22330: Ruv DNA-helicase-like protein	chr1.CM0195.5_at	-0.136211	0.703411
Lotus japonicus similar to At1g75500: nodulin-like protein	chr1.CM0195.50_at	0.178191	0.870297
Lotus japonicus similar to At1g75460: protease like protein	chr1.CM0195.55.1_at	0.422803	0.244741
<not provided>	TC11896_at	1.86196	0.00224147
Lotus japonicus similar to At1g64600: unknown protein	chr1.CM0195.7_at	-0.0198765	0.992757
Lotus japonicus similar to At2g27190: purple acid phosphatase precursor	chr1.CM0195.70_at	0.00670407	0.999999
Lotus japonicus similar to At5g01180: oligopeptide transporter - like protein	chr1.CM0195.71_at	0.00663568	0.983061
Lotus japonicus similar to At1g09850: papain-like cysteine peptidase XBCP3	chr1.CM0195.85_at	0.939481	0.0949951
Lotus japonicus similar to Q9ZRV9: (Q9ZRV9) BETA-GALACTOSIDASE (EC 3.2.1.23) (LACTASE)	chr1.CM0195.86_at	-1.42338	0.197472
Lotus japonicus similar to At1g56720: protein kinase, putative	chr1.CM0206.104_at	-0.703514	0.0996129
Lotus japonicus similar to At1g56720: protein kinase, putative	chr1.CM0206.108_at	-0.935228	0.183721
Lotus japonicus similar to At1g56350: hypothetical protein	chr1.CM0206.11_at	-0.0045809	0.993556
Lotus japonicus similar to At5g26600: unknown protein	chr1.CM0206.116_at	-0.120293	0.72983
Lotus japonicus similar to At1g53160: squamosa promoter binding protein-like 4 (spl4)	Ljwgs_038560.1_s_at	1.86193	0.00160615
Lotus japonicus similar to At3g23880: unknown protein	chr1.CM0206.123_at	-0.113488	0.862278
Lotus japonicus similar to At5g45910: GDSL-motif lipase hydrolase-like protein	chr1.CM0206.124.2_at	0.0100902	0.971736
Lotus japonicus similar to At1g28610: lipase, putative	chr1.CM0206.124_at	-0.00517041	0.999999
Lotus japonicus similar to At1g17950: unknown protein	Ljwgs_013423.1_at	1.8619	0.0212482
Lotus japonicus similar to At2g35030: hypothetical protein	chr1.CM0206.137_at	-0.0257881	0.850781
Lotus japonicus similar to At3g62630: unknown protein	chr1.CM0206.14_at	0.0279449	0.994594
Lotus japonicus similar to Q9SHZ8: (Q9SHZ8) AT2G22070 PROTEIN	chr1.CM0206.141_at	0.00254768	0.999999
Lotus japonicus similar to At3g05910: putative pectinacetylesterase	chr1.CM0206.149_at	-1.03656	0.0718976
Lotus japonicus similar to PDA6_MEDSA: (P38661) PROBABLE PROTEIN DISULFIDE ISOMERASE A6	chr1.CM0206.15_at	0.107771	0.857195
Lotus japonicus similar to Q9SC40: (Q9SC40) GERMIN-LIKE PROTEIN	chr1.CM0206.150_at	-1.00063	0.159377
Lotus japonicus similar to At1g69850: nitrate transporter (NTL1)	chr1.CM0206.152_at	-0.625831	0.285714
Lotus japonicus similar to At1g53050: cell division-related protein, putative	chr1.CM0206.153.1_s_at	-0.151738	0.876451
Lotus japonicus similar to At4g11160: translation initiation factor IF-2 like protein	chr1.CM0206.158_at	-0.375954	0.108679
Lotus japonicus similar to At4g11160: translation initiation factor IF-2 like protein	chr1.CM0206.163_at	-0.454875	0.514467
Lotus japonicus similar to At1g69850: nitrate transporter (NTL1)	chr1.CM0206.164_at	-0.576019	0.446467
Lotus japonicus similar to At3g05940: unknown protein	chr1.CM0206.167_at	0.334927	0.239441
Lotus japonicus similar to At3g22400: putative lipoxygenase	Ljwgs_134865.1_s_at	1.85551	0.00222709
Lotus japonicus similar to At3g05760: unknown protein	chr1.CM0206.20_at	0.0820572	0.86235
Lotus japonicus similar to At4g33470: unknown protein	chr1.CM0206.21_at	-0.00824681	0.972489
Lotus japonicus similar to At4g02080: SAR1 GTP-binding secretory factor	chr1.CM0206.22_at	0.0218763	0.96639
Lotus japonicus similar to At1g67940: ABC transporter like protein	TM0445.38.1_at	1.84921	0.00482722
Lotus japonicus similar to Q9XGI7: (Q9XGI7) NICOTIANAMINE SYNTHASE (EC 2.5.1.43)	chr1.CM0206.26_at	0.782646	0.0861165
Lotus japonicus similar to At1g56500: unknown protein	chr1.CM0206.32_at	-0.188422	0.524354
Lotus japonicus similar to At1g56500: unknown protein	chr1.CM0206.34_at	0.169037	0.588804
Lotus japonicus similar to Q9SWP6: (Q9SWP6) HYPERSENSITIVE REACTION ASSOCIATED CA2+-BIN	Ljwgs_132778.1_s_at	1.84765	0.0072373
Lotus japonicus similar to At3g05820: alkaline neutral invertase like protein	chr1.CM0206.41_s_at	0.0485156	0.678577
Lotus japonicus similar to At1g56590: clathrin coat assembly like protein	chr1.CM0206.43_at	-0.17958	0.60913
Lotus japonicus similar to At1g09340: RNA-binding protein like	chr1.CM0206.44_at	-0.471838	0.10849
Lotus japonicus similar to At1g09380: nodulin N21 like protein	chr1.CM0206.49_at	-0.012234	0.943795
Lotus japonicus similar to At3g06420: unknown protein	chr5.CM0158.46_at	1.84582	0.00159271
Lotus japonicus similar to At1g09415: NIMIN-3	chr1.CM0206.61_at	0.214234	0.91374
Lotus japonicus similar to At1g69490: unknown protein	chr2.TM0641.8_at	1.84464	0.0247418
Lotus japonicus similar to At1g09420: putative Glucose-6-phosphate dehydrogenase (F14J9.8)	chr1.CM0206.63.1_at	0.624094	0.121584
Lotus japonicus similar to Q9SQF9: (Q9SQF9) SHORT-CHAIN ALCOHOL DEHYDROGENASE SAD-C	chr1.CM0206.63_at	-0.00250247	0.999999
Lotus japonicus similar to At3g23360: hypothetical protein	Ljwgs_096478.1_at	1.84095	0.0162656
Lotus japonicus similar to At5g12010: putative protein	Ljwgs_061915.1_at	1.83762	0.00411861
Lotus japonicus similar to At1g67780: putative protein	chr1.CM0206.77_at	0.353977	0.590587
Lotus japonicus similar to At1g67270: unknown protein	chr1.CM0206.87_s_at	0.305482	0.378265
Lotus japonicus similar to At3g05750: hypothetical protein	chr1.CM0206.9_at	-0.213073	0.658285
Lotus japonicus similar to At5g38690: unknown protein	chr1.CM0206.92_s_at	-0.229331	0.709974
Lotus japonicus similar to At5g38690: unknown protein	chr1.CM0206.92_x_at	0.348817	0.33751
Lotus japonicus similar to At3g07100: putative Sec24-like COPII protein	chr1.CM0206.94_at	0.135231	0.742285
Lotus japonicus similar to At5g09640: carboxypeptidase like protein	chr6.CM0118.14.3_at	1.83611	0.0199543
Lotus japonicus hypothetical protein	chr1.CM0206.97.1_at	0.0316277	0.995296
Lotus japonicus similar to At4g32470: ubiquinol-cytochrome c reductase - like protein	chr1.CM0206.97_at	-0.0181659	0.986784
Lotus japonicus similar to At1g23040: predicted GPI-anchored protein	Ljwgs_051219.1_at	1.83516	0.00104771
Lotus japonicus similar to Q9SWS4: (Q9SWS4) RIPENING RELATED PROTEIN	Ljwgs_086455.1_at	1.8317	0.00923666
Lotus japonicus similar to At1g64410: unknown protein	chr1.CM0215.16.1_x_at	0.234436	0.932954
Lotus japonicus similar to At3g51010: unknown protein	chr1.CM0215.21_at	-0.104058	0.808935
Lotus japonicus similar to At3g51010: unknown protein	chr1.CM0215.21_s_at	-0.197541	0.381966
Lotus japonicus similar to At3g51010: unknown protein	chr1.CM0215.21_x_at	0.360384	0.269807
Lotus japonicus similar to At5g10695: putative protein	Ljwgs_016353.2.1_at	1.82934	0.0401674
Lotus japonicus similar to At3g02490: unknown protein	chr1.CM0215.36_at	-0.492982	0.619629
Lotus japonicus similar to At3g02490: unknown protein	chr1.CM0215.36_s_at	-0.284497	0.215316
Lotus japonicus similar to At3g42960: alcohol dehydrogenase (ATA1)	chr1.CM0215.38.1_at	-0.355849	0.845705
Lotus japonicus similar to 6DCS_SOYBN: (P26690) NAD(P)H DEPENDENT 6 -DEOXYCHALCONE SYNT	chr1.CM0215.38_at	0.00996834	0.984307
Lotus japonicus similar to 6DCS_SOYBN: (P26690) NAD(P)H DEPENDENT 6 -DEOXYCHALCONE SYNT	chr1.CM0215.38_s_at	-0.00952496	0.985356
Lotus japonicus similar to DCAM_PHANI: (Q96471) S-ADENOSYLMETHIONINE DECARBOXYLASE PROE	chr1.CM0215.42_at	0.61909	0.113279
Lotus japonicus similar to At5g38710: proline oxidase, mitochondrial precursor -like protein	chr1.CM0215.44_at	-0.677263	0.585487
Lotus japonicus similar to At1g30890: unknown protein	chr1.CM0215.49_at	0.261765	0.214046
Lotus japonicus similar to At5g36880: acetyl-CoA synthetase	chr1.CM0222.1_at	0.187212	0.410197
Lotus japonicus similar to Q9LEA9: (Q9LEA9) LIPOXYGENASE (EC 1.13.11.12)	Ljwgs_038744.1_s_at	1.82887	0.010076
Lotus japonicus similar to Q39857: (Q39857) ENDO-XYLOGLUCAN TRANSFERASE (FRAGMENT)	chr1.CM0222.11_at	-0.313629	0.358609
Lotus japonicus similar to At5g47920: unknown protein	chr1.CM0222.15_at	-0.616261	0.276392
Lotus japonicus similar to At3g26630: unknown protein	chr1.CM0222.2_at	-0.170723	0.900819
Lotus japonicus similar to At3g02060: helicase like protein	chr1.CM0222.20.1_at	-0.323328	0.547236
Lotus japonicus similar to At3g02060: helicase like protein	chr1.CM0222.20_at	0.0441794	0.921597
Lotus japonicus similar to At1g05790: hypothetical protein	chr1.CM0222.23.1_at	0.0616599	0.605826
Lotus japonicus similar to At1g12880: putative AP2 EREBP transcription factor protein	chr1.CM0222.23_at	0.231976	0.816306
Lotus japonicus similar to At3g26680: unknown protein	chr1.CM0222.25_at	0.00175017	0.999999
Lotus japonicus similar to At5g46860: syntaxin related protein AtVam3p (gb|AAC49823.1)	chr1.CM0222.28_at	-0.0725734	0.928621
Lotus japonicus similar to At5g13890: unknown protein	chr1.CM0222.30_at	0.299278	0.278029
Lotus japonicus similar to At5g13910: AP2 EREBP-like transcription factor LEAFY PETIOLE (gb|AAF32292.1)	chr1.CM0222.31_at	-0.0115803	0.965738
Lotus japonicus similar to At3g61110: ribosomal protein S27	chr1.CM0222.33_at	-0.471811	0.0839425
Lotus japonicus similar to At1g12910: flower pigmentation protein ATAN11	chr1.CM0222.4_at	-0.036833	0.950183
Lotus japonicus similar to At1g12900: glyceraldehyde 3-phosphate dehydrogenase A, cholorplast precursor, putative	chr1.CM0222.6_at	-0.413221	0.173051
Lotus japonicus similar to O65734: (O65734) ENDOXYLOGLUCAN TRANSFERASE	chr1.CM0222.7_at	-1.07494	0.101778
Lotus japonicus similar to Q9M4H0: (Q9M4H0) PUTATIVE RIPENING-RELATED PROTEIN	chr1.CM0231.10_at	-0.207574	0.287154
Lotus japonicus similar to At4g38650: putative protein	chr1.CM0231.11_at	0.248014	0.714896
Lotus japonicus similar to At4g38690: unknown protein	chr1.CM0231.12.1_at	0.790583	0.0618113
Lotus japonicus similar to At4g38690: unknown protein	chr1.CM0231.12.1_s_at	0.680744	0.0972343
Lotus japonicus similar to At4g38690: unknown protein	chr1.CM0231.12_at	0.729605	0.0621851
Lotus japonicus similar to At4g27300: putative receptor protein kinase	chr1.CM0410.65_at	1.82547	0.0242337
Lotus japonicus similar to At2g21130: cyclophilin (CYP2)	chr1.CM0231.17_at	0.622375	0.071329
Lotus japonicus similar to At2g16630: unknown protein	chr1.CM0231.20_at	0.294396	0.529491
Lotus japonicus similar to At5g60920: phytochelatin synthetase - like predicted GPI-anchored protein	chr1.CM0231.21.1_at	-0.00223331	0.999999
Lotus japonicus similar to At4g38800: unknown protein	chr1.CM0231.21_at	-0.229477	0.666004
Lotus japonicus similar to At5g27320: Unknown protein	chr5.TM1493.8_at	1.82486	0.00440909
Lotus japonicus similar to At2g03220: xyloglucan fucosyltransferase AtFT1	Ljwgs_025993.1_at	1.82225	0.000934339
Lotus japonicus similar to At5g14240: unknown protein	chr1.CM0231.31_at	-0.39916	0.14732
Lotus japonicus similar to LEU1_SOYBN: (Q39891) PROBABLE 2-ISOPROPYLMALATE SYNTHASE (EC	chr1.CM0001.71_s_at	1.8181	0.0115477
Lotus japonicus similar to At1g20290: hypothetical protein	chr1.CM0231.35_at	-0.0304502	0.913714
Lotus japonicus similar to At1g33450: unknown protein	chr1.CM0231.37_at	0.335082	0.484727
Lotus japonicus similar to At2g16570: amidophosphoribosyltransferase	chr1.CM0231.45_at	0.793954	0.133007
Lotus japonicus similar to At4g38890: unknown protein	chr1.CM0231.46.1_at	-0.0633007	0.906124
Lotus japonicus similar to At4g38890: unknown protein	chr1.CM0231.46_at	-0.159849	0.737829
Lotus japonicus similar to SPE1_PEA: (Q43075) ARGININE DECARBOXYLASE (EC 4.1.1.19) (ARG	chr1.CM0231.49.1_s_at	-0.0832603	0.953364
Lotus japonicus similar to At3g44880: lethal leaf-spot 1 homolog Lls1	Ljwgs_048091.2_at	1.81713	0.00155965
Lotus japonicus similar to At2g21290: unknown protein (At2g21290)	chr1.CM0231.49_at	0.186076	0.711308
Lotus japonicus hypothetical protein	chr1.CM0231.52_at	0.15422	0.351461
Lotus japonicus similar to At1g75630: vacuolar ATP synthase, putative	chr1.CM0231.58_at	0.0880368	0.805284
Lotus japonicus similar to SPE1_SOYBN: (Q39827) ARGININE DECARBOXYLASE (EC 4.1.1.19) (A	chr1.CM0231.62_s_at	-0.135164	0.941773
Lotus japonicus similar to At2g16470: unknown protein	chr1.CM0231.65_at	0.374649	0.271219
Lotus japonicus similar to At3g51120: putative protein	chr1.CM0231.66_at	-0.0379873	0.987812
Lotus japonicus similar to At2g25480: unknown protein	chr5.CM0519.58_at	1.81495	0.0153124
Lotus japonicus similar to O48631: (O48631) ETHYLENE-FORMING-ENZYME-LIKE DIOXYGENASE	chr1.CM0231.75_at	0.739749	0.0671835
Lotus japonicus hypothetical protein	chr1.CM0231.76_at	-0.00155713	0.999999
Lotus japonicus similar to At4g37780: myb transcription factor like protein	chr1.CM0231.79.1_at	0.161453	0.929914
Lotus japonicus similar to O24078: (O24078) PROTEIN PHOSPHATASE 2C	chr1.CM0231.80.1_at	0.485258	0.36542
Lotus japonicus similar to At5g46290: 3-oxoacyl-[acyl-carrier-protein] synthase I precursor (beta-ketoacyl-acp synthase I) (KAS I) (sp|P52410)	chr1.CM0231.80_at	0.182895	0.579988
Lotus japonicus similar to At1g47710: serpin, putative	chr1.CM0231.82_at	-0.148623	0.458032
Lotus japonicus similar to Q9AV38: (Q9AV38) PUTATIVE ZINC FINGER PROTEIN	chr1.CM0231.83_at	-0.252054	0.638246
AV765284 Lotus japonicus young plants (two-week old) Lotus corniculatus var. japonicus cDNA clone MWM039c05_f 3 , mRNA sequence reverse complement	gi45348585_at	1.8106	0.00299831
Lotus japonicus hypothetical protein	chr1.CM0233.13_at	0.275416	0.231961
Lotus japonicus similar to At2g21970: unknown protein	Ljwgs_023933.3_at	1.80941	0.00332699
Lotus japonicus similar to At4g30960: CBL-interacting protein kinase 6 (CIPK6)	TM1353.8_at	1.80888	0.0270495
Lotus japonicus similar to At4g32870: putative protein	chr1.CM0233.3_at	1.27043	0.177116
Lotus japonicus similar to At4g32830: putative serine threonine protein kinase	chr1.CM0233.30_at	-1.93984	0.113255
Lotus japonicus similar to At4g32850: poly(A) polymerase like protein	chr1.CM0233.31.1_at	0.386071	0.135578
Lotus japonicus similar to At2g25850: nuclear poly(A) polymerase	chr1.CM0233.32.1_at	0.398999	0.514221
Lotus japonicus similar to At5g25930: receptor-like protein kinase - like	chr1.CM0233.32_at	0.995935	0.0560402
Lotus japonicus similar to At5g25930: receptor-like protein kinase - like	chr1.CM0233.33_at	0.11903	0.877807
Lotus japonicus similar to At4g00160: unknown protein	chr1.CM0233.35.1_at	-0.00608608	0.985549
Lotus japonicus similar to At1g10010: putative amino acid permease	chr1.CM0233.35_at	-0.243902	0.676814
Lotus japonicus similar to At4g32820: putative protein	chr1.CM0233.38_at	0.620135	0.103117
Lotus japonicus similar to At5g11700: putative protein	chr1.CM0233.39_at	-0.042344	0.969091
Lotus japonicus similar to At1g79930: putative heat-shock protein	chr1.CM0233.4_s_at	0.0216441	0.991703
Lotus japonicus similar to At5g58380: SOS2-like protein kinase PKS2	TM1472.20_at	1.80048	0.00107992
Lotus japonicus similar to At3g13270: hypothetical protein	chr1.CM0233.44_at	-0.201572	0.892066
Lotus japonicus similar to At4g37810: hypothetical protein	chr1.CM0233.47.1_at	0.00472655	0.999999
Lotus japonicus similar to At1g10040: unknown protein	chr1.CM0233.47_at	0.0471635	0.97507
Lotus japonicus similar to At4g22920: unknown protein	chr2.CM0304.71_at	1.79471	0.00705104
Lotus japonicus similar to At1g10020: unknown protein	chr1.CM0233.51_at	-0.940807	0.118895
Lotus japonicus hypothetical protein	chr1.CM0233.54_at	0.00772892	0.999909
Lotus japonicus similar to At4g08170: unknown protein	chr1.CM0233.55_at	0.407509	0.40542
Lotus japonicus similar to Q9LI28: (Q9LI28) ESTS D23839(R0339)	chr1.CM0233.61_at	-0.118283	0.198701
Lotus japonicus similar to At3g13670: casein kinase, putative	chr1.CM0233.8_at	0.398331	0.12367
Lotus japonicus similar to Q9LS52: (Q9LS52) GB|AAD39678.1	chr1.CM0233.9_at	0.240376	0.222653
Lotus japonicus similar to At3g10960: unknown protein	chr1.CM0248.10_at	-0.277754	0.752539
Lotus japonicus similar to At1g12520: Cu Zn superoxide dismutase copper chaperone like protein	Ljwgs_028068.1_at	1.78804	0.00495763
Lotus japonicus similar to At3g10940: unknown protein	chr1.CM0248.13_at	-0.169708	0.600337
Lotus japonicus similar to At2g40600: unknown protein	chr1.CM0248.14_at	0.250609	0.534378
Lotus japonicus similar to At1g48580: hypothetical protein	chr1.CM0248.19_at	0.0306445	0.834773
Lotus japonicus similar to At1g48580: hypothetical protein	chr1.CM0248.19_x_at	-0.00302598	0.999999
Lotus japonicus similar to Q9XIV9: (Q9XIV9) PEROXIDASE (EC 1.11.1.7)	chr1.CM0248.26_at	0.196022	0.931108
Lotus japonicus similar to At5g19660: subtilisin-like protein	chr1.CM0248.34_at	0.101403	0.876067
Lotus japonicus hypothetical protein	chr1.CM0248.45.1_at	0.635183	0.0874851
Lotus japonicus similar to At4g00830: unknown protein	chr1.CM0248.58_s_at	-0.377009	0.185002
Lotus japonicus similar to At3g15310: unknown protein	chr1.CM0248.71_x_at	-0.0493869	0.97384
Lotus japonicus similar to At2g05170: unknown protein	chr1.CM0248.84_at	-0.0131008	0.936561
Lotus japonicus similar to At2g05170: unknown protein	chr1.CM0248.84_x_at	-0.00398942	0.995219
Lotus japonicus hypothetical protein	chr1.CM0248.87.1_x_at	9.20686e-05	0.999999
Lotus japonicus similar to At3g56680: unknown protein	chr1.CM0269.13_at	0.180902	0.172873
Lotus japonicus similar to At3g10760: unknown protein	chr1.CM0269.15_at	-0.248373	0.700302
Lotus japonicus similar to At3g56690: calmodulin-binding protein	chr1.CM0269.18_at	0.0992072	0.848036
AV769913 Lotus japonicus Young plants (two-weeks old) Lotus corniculatus var. japonicus cDNA clone MWL074e01_f 3 , mRNA sequence reverse complement	gi45353169_at	1.78594	0.00321798
Lotus japonicus similar to At4g36950: MAP3K-like protein kinase	Ljwgs_029042.2_at	1.78126	0.00112716
Lotus japonicus similar to At5g12250: tubulin beta-6 chain (sp|P29514)	chr1.CM0269.30_at	-1.24181	0.0994128
Lotus japonicus similar to At5g05140: unknown protein	chr1.CM0269.33.1_at	-0.152544	0.833779
Lotus japonicus similar to At5g05140: unknown protein	chr1.CM0269.33_at	-0.0240742	0.992042
Lotus japonicus similar to At4g23730: unknown protein	chr1.CM0269.35_x_at	0.194163	0.351931
Lotus japonicus similar to At2g01250: 60S ribosomal protein L7	chr1.CM0269.4.2_x_at	0.0138556	0.97518
Lotus japonicus similar to Q9DGK5: (Q9DGK5) SPLICING FACTOR ARGININE SERINE RICH 2 (FRA	chr1.CM0269.6.1_at	-0.0039641	0.999999
Lotus japonicus similar to At2g40950: bZIP tanscription factor like protein	chr1.CM0269.8_at	0.182207	0.748019
Lotus japonicus similar to AAK54302: (AAK54302) PUTATIVE HELICASE	chr1.CM0275.1.1_at	0.0838896	0.53339
Lotus japonicus similar to At1g06650: oxidoreductase, putative	CM0693.18_at	1.77893	9.67218e-05
Lotus japonicus hypothetical protein	chr1.CM0275.12_at	0.0184718	0.985232
Lotus japonicus similar to Q9SXC5: (Q9SXC5) T17H3.9	chr1.CM0275.16_at	-0.510077	0.138747
Lotus japonicus similar to Q9SXC5: (Q9SXC5) T17H3.9	chr1.CM0275.17_at	0.547968	0.21125
Lotus japonicus similar to Q42792: (Q42792) ASPARAGINE SYNTHETASE (EC 6.3.5.4) (ASPARAG	chr1.CM0275.19.1_at	0.0702705	0.834267
Lotus japonicus similar to Q42792: (Q42792) ASPARAGINE SYNTHETASE (EC 6.3.5.4) (ASPARAG	chr1.CM0275.19.1_x_at	0.0925568	0.74027
Lotus japonicus similar to PAPA_CARPA: (P00784) PAPAIN PRECURSOR (EC 3.4.22.2) (PAPAYA	chr1.CM0275.19_at	0.0544939	0.938285
Lotus japonicus similar to At1g73310: putative serine carboxypeptidase	chr3.TM0984.4.1_at	1.77356	0.00275831
Lotus japonicus similar to At1g09960: putative sucrose H+ symporter	chr1.CM0275.6_at	0.332917	0.887826
Lotus japonicus similar to Q9M4H5: (Q9M4H5) PUTATIVE RIPENING-RELATED PROTEIN	chr4.CM0244.26_s_at	1.7708	0.0170373
Lotus japonicus similar to At1g01920: hypothetical protein	chr1.CM0284.16_at	-0.196615	0.698254
Lotus japonicus similar to Q9ZU10: (Q9ZU10) F5F19.22 PROTEIN (FRAGMENT)	Ljwgs_012049.1_at	1.76729	0.00418422
Lotus japonicus similar to At5g35731: unknown protein	chr1.CM0284.20.1_at	0.0631553	0.981041
Lotus japonicus similar to At3g06240: unknown protein	chr1.CM0284.21.1_at	0.163684	0.481268
Lotus japonicus similar to At3g06240: unknown protein	chr1.CM0284.21_at	0.167732	0.853216
Lotus japonicus hypothetical protein	chr1.CM0284.25.2_at	0.0849754	0.902747
Lotus japonicus similar to At3g06240: unknown protein	chr1.CM0284.29_at	0.117586	0.62471
Lotus japonicus similar to At2g45720: unknown protein	chr1.CM0284.3_at	0.957718	0.13233
Lotus japonicus similar to At1g62670: PPR-repeat protein	chr1.CM0284.30_at	-0.00561914	0.999999
Lotus japonicus similar to At5g13930: chalcone synthase (naringenin-chalcone synthase) (testa 4 protein) (sp|P13114)	chr1.CM0284.33_x_at	0.354069	0.811751
Lotus japonicus similar to At1g23280: mak16-like protein-related	chr1.CM0284.34_at	-0.110944	0.76305
Lotus japonicus similar to At4g22990: unknown protein	chr1.CM0284.39_at	-0.250566	0.868858
Lotus japonicus similar to O24097: (O24097) MTN19 GENE PRECURSOR	chr4.CM0007.37_at	1.76636	0.0132271
Lotus japonicus similar to At5g25560: unknown protein	Ljwgs_122339.1_s_at	1.76547	0.00874967
Lotus japonicus hypothetical protein	chr1.CM0284.50_at	0.15133	0.767191
Lotus japonicus similar to At4g23890: unknown protein	chr1.CM0284.51_at	0.0996974	0.911307
Lotus japonicus similar to At3g61220: unknown protein (At3g61220)	chr1.CM0284.55.1_at	0.362983	0.648929
Lotus japonicus similar to At3g61220: unknown protein (At3g61220)	chr1.CM0284.55_at	0.100199	0.337352
Lotus japonicus similar to O65090: (O65090) RRNA METHYLASE	chr1.CM0284.6_at	0.0983466	0.832287
Lotus japonicus similar to At3g61220: unknown protein (At3g61220)	chr1.CM0284.60.1_at	0.000372479	0.999999
Lotus japonicus similar to At3g61220: unknown protein (At3g61220)	chr1.CM0284.60.1_s_at	0.505706	0.445867
Lotus japonicus similar to At5g09300: branched-chain alpha keto-acid dehydrogenase E1 alpha subunit-like protein	Ljwgs_088435.1_at	1.76319	0.0448973
Lotus japonicus similar to At4g00525: unknown protein	chr1.CM0284.62.1_at	0.369126	0.471549
Lotus japonicus similar to At4g00620: putative tetrahydrofolate synthase	chr1.CM0284.62_at	0.0578875	0.888942
Lotus japonicus similar to At4g00620: putative tetrahydrofolate synthase	chr1.CM0284.62_s_at	-0.116547	0.615807
Lotus japonicus similar to At3g17980: unknown protein	Ljwgs_143015.1_at	1.75138	0.000905946
Lotus japonicus similar to At5g37350: unknown protein	chr1.CM0284.72_at	-0.15587	0.516666
Lotus japonicus similar to At5g37350: unknown protein	chr1.CM0284.72_s_at	-0.117887	0.756741
Lotus japonicus similar to At4g10160: unknown protein (At4g10160)	chr1.CM0284.8_at	0.394575	0.287465
Lotus japonicus similar to At5g35731: unknown protein	chr1.CM0284.9_at	0.110756	0.876286
Lotus japonicus similar to Q9SKW9: (Q9SKW9) F5J5.1	chr1.CM0289.13_x_at	0.0859588	0.962321
Lotus japonicus similar to At4g24990: geranylgeranylated protein ATGP4	chr1.CM0289.18_at	0.0150303	0.942979
Lotus japonicus similar to At3g03010: unknown protein	chr1.CM0289.29_x_at	0.126595	0.574408
Lotus japonicus similar to Q9ASH0: (Q9ASH0) P0686E09.10 PROTEIN	chr1.CM0289.30.1_at	0.0582863	0.8423
Lotus japonicus similar to At1g20390: hypothetical protein	chr1.CM0289.36_at	0.0045832	0.994567
Lotus japonicus similar to At1g48580: hypothetical protein	chr1.CM0289.38_x_at	-0.00234482	0.999999
Lotus japonicus similar to At3g30560: hypothetical protein	chr1.CM0289.42_x_at	-0.00329572	0.999999
Lotus japonicus similar to At4g24470: unknown protein	chr1.CM0289.45.2_at	0.458392	0.208952
Lotus japonicus similar to At4g24470: unknown protein	chr1.CM0289.45_at	0.238992	0.60373
Lotus japonicus similar to At1g65580: hypothetical protein	chr1.CM0289.48.1_at	0.0308661	0.911431
Lotus japonicus similar to At3g20290: unknown protein	chr1.CM0289.49.1_s_at	0.243696	0.607821
Lotus japonicus similar to Q9M404: (Q9M404) PUTATIVE RHO GDP DISSOCIATION INHIBITOR	chr1.CM0295.12_at	-0.134707	0.78329
Lotus japonicus similar to At4g28600: unknown protein	chr1.CM0295.13_at	0.391546	0.112816
Lotus japonicus similar to At4g28600: unknown protein	chr1.CM0295.13_s_at	0.508567	0.207818
Lotus japonicus similar to At3g23410: unknown protein	chr1.CM0295.15_at	0.55828	0.0527077
Lotus japonicus similar to At5g46050: peptide transporter	chr1.CM0295.2.1_at	1.07653	0.5358
Lotus japonicus similar to Q9FWL0: (Q9FWL0) PUTATIVE PEPTIDE TRANSPORT PROTEIN	chr1.CM0295.2_at	0.577885	0.398703
Lotus japonicus similar to At2g21440: unknown protein (At2g21440)	chr1.CM0295.20_at	-0.152041	0.654725
Lotus japonicus similar to At5g44070: phytochelatin synthase 1 (AtPCS1)	chr1.CM0295.22.1_at	0.10007	0.861192
Lotus japonicus similar to At5g44070: phytochelatin synthase 1 (AtPCS1)	chr1.CM0295.23_at	-0.569287	0.101459
Lotus japonicus similar to At2g20430: hypothetical protein	chr1.CM0295.24.1_at	-0.00257788	0.999999
Lotus japonicus similar to At1g03950: unknown protein (At1g03950)	chr1.CM0295.25_at	0.122133	0.748009
Lotus japonicus similar to At1g03920: putative protein kinase	chr1.CM0295.29_at	0.138448	0.440719
Lotus japonicus similar to At4g14360:	chr1.CM0295.31_at	0.356353	0.530564
Lotus japonicus similar to At3g54790: unknown protein	chr1.CM0295.33_at	0.439012	0.317287
Lotus japonicus hypothetical protein	chr1.CM0295.34.1_at	-0.0100694	0.965367
Lotus japonicus similar to At5g19950: unknown protein	chr1.CM0295.41_at	0.150224	0.625479
Lotus japonicus similar to At3g60490: transcription factor - like protein	TM0556.5_at	1.75061	0.00355606
Lotus japonicus similar to At1g06210: unknown protein	chr1.CM0295.47_at	0.507877	0.0621698
Lotus japonicus similar to Q9AUC6: (Q9AUC6) CYSTEINE PROTEASE	chr1.CM0295.51_at	0.00618191	0.990712
Lotus japonicus similar to Q24044: (Q24044) FIZZY PROTEIN	chr1.CM0295.56_at	-0.00162281	0.999999
Lotus japonicus similar to At1g04020: unknown protein	chr1.CM0295.6.2_s_at	-1.16549	0.0526681
Lotus japonicus similar to At1g04020: unknown protein	chr1.CM0295.6_s_at	-0.990697	0.123322
Lotus japonicus similar to At1g41690: hypothetical protein	chr1.CM0295.70_at	0.000533598	0.999999
Lotus japonicus similar to At4g24940: ubiquitin activating enzyme like protein	chr1.CM0295.72_at	-0.0736729	0.888032
Lotus japonicus similar to Q9SNP2: (Q9SNP2) EST AU056133(S20320) CORRESPONDS TO A REGIO	chr1.CM0295.75.1_at	0.0143912	0.945829
Lotus japonicus similar to At5g12420: unknown protein	chr1.CM0315.11_s_at	-0.104696	0.876979
Lotus japonicus similar to O48971: (O48971) ALDOSE-1-EPIMERASE-LIKE PROTEIN	chr1.CM0315.14_at	0.257229	0.561521
Lotus japonicus similar to O27529: (O27529) SERINE THREONINE PROTEIN KINASE RELATED PRO	chr1.CM0315.31_at	0.016884	0.986739
Lotus japonicus similar to At3g63530: putative protein	chr1.CM0315.39_at	-0.097732	0.862094
Lotus japonicus similar to At4g33580: carbonate dehydratase - like protein	Ljwgs_037261.0.1_x_at	1.74873	0.00662467
Lotus japonicus similar to At5g39900: GTP-binding protein-like	chr1.CM0315.40.1_at	-0.154107	0.449763
Lotus japonicus similar to At1g17590: transcription factor, putative	TM0837.20_at	1.74747	0.00771931
Lotus japonicus similar to At1g20920: putative RNA helicase	chr1.CM0315.55_at	-0.449295	0.508582
Lotus japonicus similar to Q9M4G8: (Q9M4G8) PUTATIVE RIPENING-RELATED P-450 ENZYME	chr1.CM0315.60_at	-0.28189	0.767926
Lotus japonicus similar to At4g28650: receptor protein kinase-like protein	chr1.CM0315.7_at	-0.00511366	0.990249
Lotus japonicus similar to At1g76860: unknown protein	chr1.CM0316.13_at	-0.0934752	0.933624
Lotus japonicus similar to At1g07840: unknown protein	chr1.CM0316.23_at	-0.388311	0.145899
Lotus japonicus similar to At1g26660: unknown protein	chr1.CM0316.25.1_at	0.263518	0.453779
Lotus japonicus similar to At3g17800: unknown protein	chr3.CM0468.21_s_at	1.73794	0.016699
Lotus japonicus similar to At3g24110: hypothetical protein	chr1.CM0316.25_at	0.435755	0.399081
Lotus japonicus similar to At1g02170: hypothetical protein	chr1.CM0316.28_at	0.308105	0.295752
Lotus japonicus similar to At3g52670: putative protein	chr1.CM0316.8_at	-0.235728	0.556506
Lotus japonicus similar to At1g09780: putative 2,3-bisphosphoglycerate-independent phosphoglycerate mutase	chr3.TM0576.19_s_at	1.73737	0.00333339
Lotus japonicus similar to Q9LKQ8: (Q9LKQ8) POLYGALACTURONASE INHIBITING PROTEIN	chr1.CM0318.12.1_at	-2.59668	0.336092
Lotus japonicus similar to Q9ZWH6: (Q9ZWH6) POLYGALACTURONASE INHIBITOR	chr1.CM0318.14.2_at	-2.67419	0.383114
Lotus japonicus similar to Q9C7D8: (Q9C7D8) HYPOTHETICAL 40.4 KDA PROTEIN	chr1.CM0318.17_at	-0.89085	0.0984359
Lotus japonicus similar to At5g06860: polygalacturonase inhibiting protein 1; PGIP1 (gb|AAF69827.1)	chr1.CM0318.18_at	-1.51586	0.165341
Lotus japonicus similar to At3g57860: unknown protein	chr1.CM0318.19_at	-2.00159	0.0691254
Lotus japonicus similar to O80420: (O80420) POLYGALACTURONASE INHIBITOR (PGIP)	chr1.CM0318.2.1_at	-1.40731	0.272482
Lotus japonicus similar to At5g06870: polygalacturonase inhibiting protein	chr1.CM0318.2.2_at	-1.46283	0.185852
Lotus japonicus similar to At2g42280: unknown protein	chr1.CM0318.21_at	-0.671195	0.346118
Lotus japonicus similar to At2g43190: unknown protein	chr1.CM0318.22_at	-0.193401	0.489885
Lotus japonicus similar to At3g57790: unknown protein	chr1.CM0318.23_at	-0.857714	0.0526994
Lotus japonicus similar to At2g42320: unknown protein	chr1.CM0318.25_at	0.0503554	0.983091
Lotus japonicus similar to At2g16440: putative CDC21 protein	chr1.CM0318.28_at	0.104539	0.773151
Lotus japonicus similar to At5g06940: receptor protein kinase-like protein	chr1.CM0318.30_at	-0.232928	0.153486
Lotus japonicus similar to At5g48740: receptor protein kinase-like protein	chr1.CM0318.31.1_at	0.0525301	0.868218
Lotus japonicus similar to At1g34350: unknown protein	chr1.CM0318.33_at	-0.685647	0.0644241
Lotus japonicus similar to Q9XH71: (Q9XH71) HYPOTHETICAL 18.5 KDA PROTEIN	chr1.CM0318.34_at	0.530539	0.0779497
Lotus japonicus similar to At1g17930: unknown protein	chr1.CM0318.35_at	0.00541072	0.999999
Lotus japonicus similar to At5g06910: DnaJ homologue (gb|AAB91418.1|)	chr1.CM0318.37_at	-1.49934	0.088454
Lotus japonicus hypothetical protein	chr1.CM0318.41_at	-0.00748828	0.987462
Lotus japonicus similar to C932_SOYBN: (Q42799) CYTOCHROME P450 93A2 (EC 1.14.-.-)	chr1.CM0318.5_at	-0.00780109	0.996636
Lotus japonicus similar to At3g05610: putative pectinesterase	chr1.CM0318.50_at	-0.0046476	0.993839
Lotus japonicus similar to At3g57650: 1-acylcerol-3-phosphate acyltransferase - like protein	chr1.CM0318.53.1_at	-0.140752	0.793325
Lotus japonicus similar to Q9SDN3: (Q9SDN3) 1-ACYL-SN-GLYCEROL-3-PHOSPHATE ACYLTRANSFER	chr1.CM0318.53_at	0.0527358	0.903652
Lotus japonicus similar to At2g03270: helicase like protein	chr1.CM0318.55_at	0.172272	0.802689
BP066391 Lotus corniculatus var. japonicus mature nodule Lotus corniculatus var. japonicus cDNA clone GENLf075b01 3 , mRNA sequence reverse complement	gi45623136_at	1.73405	0.00792373
Lotus japonicus similar to At5g41770: cell cycle control crn (crooked neck) protein-like	chr1.CM0318.6_at	0.213878	0.17656
Lotus japonicus similar to At3g57610: adenylosuccinate synthetase	chr1.CM0318.60.1_at	-0.141027	0.421174
Lotus japonicus similar to At3g57610: adenylosuccinate synthetase	chr1.CM0318.60.1_x_at	-0.206629	0.464893
Lotus japonicus similar to At3g52110: unknown protein	chr1.CM0318.62.1_at	-1.66932	0.154877
Lotus japonicus similar to At3g57570: unknown protein	chr1.CM0318.65_at	0.515208	0.240255
Lotus japonicus hypothetical protein	chr1.CM0318.66_s_at	0.0159551	0.999999
Lotus japonicus similar to At3g57570: unknown protein	chr1.CM0318.67_at	0.0559752	0.820502
Lotus japonicus similar to At5g41770: cell cycle control crn (crooked neck) protein-like	chr1.CM0318.7_at	-0.358915	0.459936
Lotus japonicus similar to At3g52100: putative protein	chr1.CM0318.72.1_at	0.65563	0.229351
Lotus japonicus similar to At3g57670: zinc finger - like protein	chr1.CM0318.73_at	0.0860018	0.722408
Lotus japonicus similar to At3g57800: bHLH like transcription factor (bHLH060)	chr1.CM0318.9_at	0.200715	0.638484
Lotus japonicus similar to At5g05250: unknown protein	chr1.CM0320.1_at	-1.2895	0.0539332
Lotus japonicus similar to At2g40660: putative methionyl-tRNA synthetase	chr1.CM0320.10_at	-0.533807	0.379604
Lotus japonicus similar to At2g40660: putative methionyl-tRNA synthetase	chr1.CM0320.12_at	-0.11496	0.859678
Lotus japonicus similar to At5g41330: putative protein	chr1.CM0320.15_at	-0.00318008	0.999181
Lotus japonicus similar to At3g56380: response regulator-like protein	chr1.CM0320.19_at	-0.330487	0.527074
Lotus japonicus similar to At1g47710: serpin, putative	chr1.CM0320.2_at	0.000798431	0.999999
Lotus japonicus hypothetical protein	chr1.CM0320.21.1_at	-0.156664	0.433458
Lotus japonicus similar to At3g13250: hypothetical protein	chr1.CM0320.21_x_at	0.400638	0.166842
Lotus japonicus similar to At3g17700: cyclic nucleotide-binding transporter 1 (CNBT1)	chr1.CM0320.25_at	0.293808	0.328415
Lotus japonicus similar to At3g15720: polygalacturonase - like predicted GPI-anchored protein	chr1.CM0320.29_s_at	0.432537	0.0836819
Lotus japonicus similar to At2g25010: unknown protein	chr1.CM0320.34_s_at	0.0377225	0.957711
Lotus japonicus similar to At3g25970: hypothetical protein	chr1.CM0320.4.1_at	0.00973311	0.967811
Lotus japonicus similar to ICI1_PHAAN: (P16064) SUBTILISIN INHIBITORS I AND II (ASI-I A	Ljwgs_009761.2_at	1.73294	0.00845996
Lotus japonicus similar to At1g52520: F6D8.26	chr1.CM0320.44_s_at	-0.00416057	0.995715
Lotus japonicus similar to At3g56400: putative DNA-binding protein	chr1.CM0320.45_at	-0.122385	0.962243
Lotus japonicus similar to At2g38560: putative elongation factor	chr1.CM0320.52_at	-0.334219	0.513503
Lotus japonicus similar to At5g05220: unknown protein	chr1.CM0320.53_at	-0.00216278	0.999999
Lotus japonicus similar to At2g40780: putative translation initiation factor	chr1.CM0320.55_at	-0.0320273	0.973036
Lotus japonicus similar to At5g05190: unknown protein	chr1.CM0320.56_at	0.0845749	0.858106
Lotus japonicus similar to At5g05180: unknown protein	chr1.CM0320.57_at	-1.13525	0.142133
Lotus japonicus similar to At3g63380: Ca2+-transporting ATPase -like protein	chr1.CM0322.1_at	1.01974	0.0916464
Lotus japonicus similar to At1g03070: putative glutamate aspartate-binding peptide	chr1.CM0322.11_at	0.61808	0.303539
Lotus japonicus similar to At3g63300: unknown protein	chr1.CM0322.12_at	-0.0433044	0.788566
Lotus japonicus similar to At1g54510: unknown protein	chr1.CM0322.13_at	0.620788	0.17458
Lotus japonicus similar to At1g03080: unknown protein	chr1.CM0322.15.1_at	0.26571	0.565668
Lotus japonicus similar to At3g63270: unknown protein	chr1.CM0322.17_at	-0.283473	0.779629
Lotus japonicus similar to Q43098: (Q43098) CHITINASE (EC 3.2.1.14)	chr5.CM0456.14_s_at	1.72877	0.0237378
Lotus japonicus similar to At1g37110:	chr1.CM0322.20_at	-0.159851	0.836208
Lotus japonicus similar to PRU1_PRUAR: (O50001) MAJOR ALLERGEN PRU AR 1	Ljwgs_026920.1_at	1.71677	0.0489768
Lotus japonicus similar to At5g37370: unknown protein	chr1.CM0322.4.3_x_at	0.0329794	0.948206
Lotus japonicus similar to At1g31940: unknown protein	chr1.CM0322.4_s_at	0.383091	0.187763
Lotus japonicus similar to At4g02670: putative zinc finger protein	chr1.CM0322.6_at	0.0400395	0.983183
Lotus japonicus similar to At3g22830: putative heat shock protein	chr1.CM0322.8_at	0.397156	0.529225
Lotus japonicus similar to At1g36675: putative protein	chr1.CM0349.1_x_at	0.054191	0.971924
Lotus japonicus similar to At2g26170: Cytochrome P450 like protein	chr1.CM0349.12_at	0.208218	0.797146
Lotus japonicus similar to At2g26180: putative SF16 protein {Helianthus annuus}	chr1.CM0349.14_at	0.0778637	0.659309
Lotus japonicus similar to At1g14560: mitochondrial carrier like protein	chr1.CM0349.17_at	0.555267	0.40866
Lotus japonicus similar to At5g11950: lysine decarboxylase - like protein	chr1.CM0349.27_at	0.248778	0.710896
Lotus japonicus similar to At5g11970: unknown protein	chr1.CM0349.34_at	0.597866	0.321197
Lotus japonicus similar to At5g11960: unknown protein	chr1.CM0349.38_at	0.0283804	0.979182
Lotus japonicus similar to At5g11960: unknown protein	chr1.CM0349.44_at	0.104108	0.806803
Lotus japonicus similar to At4g33080: protein kinase like protein	chr1.CM0349.51_at	0.358776	0.355896
Lotus japonicus similar to At2g26140: FtsH like protease	chr1.CM0349.8_at	0.166569	0.889318
Lotus japonicus similar to At2g35940: putative homeodomain transcription factor	chr1.CM0361.1_at	0.703961	0.208952
Lotus japonicus similar to At5g16280: putative protein	chr1.CM0361.11_at	0.24581	0.379404
Lotus japonicus similar to Q40362: (Q40362) EARLY NODULIN	chr1.CM0361.12.1_at	0.00540186	0.998046
Lotus japonicus similar to At3g52390: unknown protein	chr1.CM0361.13_at	0.0499841	0.904908
Lotus japonicus similar to At1g70530: putative protein kinase	chr4.CM0161.14_at	1.71086	0.0285346
Lotus japonicus similar to At5g04830: unknown protein	chr5.CM0909.5_at	1.7105	0.00839417
Lotus japonicus similar to At3g05675: unknown protein	chr1.CM0361.2_at	0.133037	0.794443
Lotus japonicus similar to O04180: (O04180) PGE1 PROTEIN	chr1.CM0361.20_s_at	-0.00631369	0.986186
Lotus japonicus similar to At3g14710: unknown protein	chr1.CM0361.24_at	-0.127825	0.388181
Lotus japonicus similar to Q9SHK3: (Q9SHK3) F12K11.7	chr1.CM0361.27_at	-0.15207	0.60048
Lotus japonicus similar to At2g35860: unknown protein	chr1.CM0361.28_at	0.0288677	0.989038
Lotus japonicus similar to At1g73310: putative serine carboxypeptidase	chr6.CM0118.12.1_at	1.70612	0.0099651
Lotus japonicus similar to At5g22030: ubiquitin-specific protease 8 (UBP8)	chr1.CM0361.32_at	0.136592	0.621859
Lotus japonicus similar to PMGI_RICCO: (P35493) 2,3-BISPHOSPHOGLYCERATE-INDEPENDENT PHO	Ljwgs_033912.1_at	1.70565	0.00807953
Lotus japonicus similar to At2g35880: unknown protein	chr1.CM0361.34_at	-0.252752	0.449699
Lotus japonicus similar to At1g29320: unknown protein	chr1.CM0361.37.1_at	-0.352256	0.294131
Lotus japonicus similar to At2g35900: unknown protein	chr1.CM0361.37_at	0.32266	0.0609178
Lotus japonicus similar to At5g06440: unknown protein	chr1.CM0361.38_at	0.59853	0.0994128
Lotus japonicus similar to At3g11750: putative dihydroneopterin aldolase	chr1.CM0361.39_at	0.100795	0.77992
Lotus japonicus similar to At3g11760: unknown protein	chr1.CM0361.42_at	0.0662134	0.828163
Lotus japonicus similar to At5g22000: RING-H2 finger protein RHF2a	chr1.CM0361.44_at	0.394188	0.17072
Lotus japonicus similar to Q9LEA9: (Q9LEA9) LIPOXYGENASE (EC 1.13.11.12)	chr5.CM0096.7_s_at	1.70163	0.0175637
Lotus japonicus similar to At3g52360: unknown protein	chr1.CM0361.50_at	-0.125392	0.440327
Lotus japonicus similar to At4g33270: putative cdc20 protein (CDC20.1)	chr1.CM0361.51_at	-0.526431	0.171958
Lotus japonicus similar to At5g06530: ABC transporter like protein	chr1.CM0361.52_at	3.65576	0.0536669
Lotus japonicus similar to At3g54750: unknown protein	chr1.CM0361.53_at	-1.59561	0.0767143
Lotus japonicus similar to Q9FG15: (Q9FG15) SIMILARITY TO UNKNOWN PROTEIN	chr1.CM0361.56_at	-0.136983	0.831022
Lotus japonicus similar to At3g31970: hypothetical protein	chr1.CM0361.60_at	-0.0470987	0.976788
Lotus japonicus similar to At5g06560: putative protein	chr1.CM0361.61_at	0.327197	0.501866
Lotus japonicus similar to At5g15770: acetyltransferase-like protein	chr1.CM0361.62_at	0.0308029	0.976893
Lotus japonicus similar to At5g03905: unknown protein	chr1.CM0361.63_s_at	0.123061	0.786837
Lotus japonicus similar to At3g60500: nucleolar autoantigen - like protein	chr1.CM0361.64_at	-0.111143	0.613413
Lotus japonicus similar to At3g52450: unknown protein	chr1.CM0361.8_at	1.48927	0.368938
Lotus japonicus similar to At4g00620: putative tetrahydrofolate synthase	Ljwgs_005477.1.1_at	1.69781	0.0300769
Lotus japonicus similar to At2g30590: unknown protein	chr1.CM0375.16_s_at	-0.393295	0.234376
Lotus japonicus similar to At4g38180: unknown protein (At4g38180)	chr1.CM0375.17.1_at	-0.0493419	0.986751
Lotus japonicus similar to At1g03030: unknown protein	chr1.CM0375.2_at	0.285108	0.216288
Lotus japonicus similar to At5g28290: serine (threonine) protein kinase - like	chr1.CM0375.20.2_at	-0.349458	0.423702
Lotus japonicus similar to At2g30590: unknown protein	chr1.CM0375.20_at	-0.645238	0.213342
Lotus japonicus similar to At1g71680: amino acid permease, putative	chr1.CM0375.21_at	0.00605952	0.999999
Lotus japonicus similar to At2g30630: unknown protein	chr1.CM0375.24_at	0.0708222	0.646859
Lotus japonicus similar to At3g04610: putative RNA-binding protein	chr1.CM0375.25_at	-0.253302	0.631304
Lotus japonicus similar to At4g16430: putative transcription factor BHLH3	chr1.CM0375.31_at	0.0628436	0.832173
Lotus japonicus similar to O81117: (O81117) P450-DEPENDENT FATTY ACID HYDROXYLASE	chr1.CM0375.32_at	0.215979	0.805205
Lotus japonicus similar to At3g04610: putative RNA-binding protein	chr1.CM0375.33_at	-0.243015	0.223594
Lotus japonicus similar to At2g30620: putative histone H1 protein	chr1.CM0375.36_at	0.159926	0.803631
Lotus japonicus similar to At3g23050: indoleacetic acid (IAA)-inducible gene (IAA7)	chr1.CM0375.38_at	0.691867	0.191934
Lotus japonicus similar to AX2E_PHAAU: (O24543) AUXIN-INDUCED PROTEIN 22E (INDOLE-3-ACE	chr1.CM0375.42_at	0.749921	0.165225
Lotus japonicus similar to Q9FP34: (Q9FP34) P0035H10.7 PROTEIN	chr1.CM0375.43_x_at	-0.431044	0.33317
Lotus japonicus similar to At4g02590: putative bHLH transcription factor (bHLH059)	chr1.CM0375.45.1_at	0.278398	0.268226
Lotus japonicus similar to TYD2_PAPSO: (P54769) TYROSINE DOPA DECARBOXYLASE 2 [INCLUDES	Ljwgs_067857.1_at	1.6953	0.0250419
Lotus japonicus similar to At3g10050: threonine dehydratase deaminase (OMR1)	chr1.CM0375.48_at	-0.1291	0.864553
Lotus japonicus similar to At1g51440: unknown protein	chr1.CM0375.5_at	0.93679	0.18541
weakly similar to PIR|A44805|A44805 eggshell protein precursor - fluke (Schistosoma haematobium) {Schistosoma haematobium;} , partial (24%)	TC19911_at	1.68749	0.00413493
Lotus japonicus similar to At3g54610: histone acetyltransferase (HAT1)	chr1.CM0375.52_at	-0.113163	0.705042
Lotus japonicus similar to At2g38840: putative guanylate binding protein	chr1.CM0375.54_at	-0.454982	0.213646
Lotus japonicus similar to Q9FQE0: (Q9FQE0) GLUTATHIONE S-TRANSFERASE GST 18 (EC 2.5.1.	Ljwgs_018999.1_at	1.68602	0.00931632
Lotus japonicus similar to At3g54560: histone H2A.F Z	chr1.CM0375.57_at	-2.66765	0.052328
Lotus japonicus similar to At1g03055: putative protein	chr1.CM0375.58_at	0.53865	0.580982
Lotus japonicus similar to At3g63430: unknown protein	chr1.CM0375.59_at	-0.511501	0.3455
Lotus japonicus similar to PSBW_SPIOL: (Q41387) PHOTOSYSTEM II REACTION CENTER W PROTEI	chr1.CM0375.6_at	-0.211092	0.870191
Lotus japonicus similar to At1g02970: unknown protein	chr1.CM0375.61.1_at	-0.236723	0.513401
Lotus japonicus similar to At1g02970: unknown protein	chr1.CM0375.61.1_x_at	-0.19571	0.118461
Lotus japonicus similar to At1g06780: unknown protein (At1g06780)	chr1.CM0375.7.1_at	0.617815	0.0734039
Lotus japonicus similar to At3g17800: unknown protein	Ljwgs_057254.2_s_at	1.68179	0.0264462
Lotus japonicus similar to At5g64560: unknown protein	chr1.CM0375.9_at	0.604096	0.138126
Lotus japonicus similar to C762_SOLME: (P37122) CYTOCHROME P450 76A2 (EC 1.14.-.-) (CYP	chr1.CM0378.1_at	0.368435	0.305775
Lotus japonicus similar to At5g03760: unknown protein	chr1.CM0378.15_at	-0.0846605	0.956403
Lotus japonicus similar to At1g10840: ranslation initiation factor like protein	chr1.CM0378.17.1_at	-0.124617	0.905288
Lotus japonicus similar to At1g10840: ranslation initiation factor like protein	chr1.CM0378.17.1_s_at	0.105557	0.73046
Lotus japonicus similar to At5g12100: unknown protein (At5g12100)	chr1.CM0378.19_at	0.362925	0.432275
Lotus japonicus similar to At5g35460: unknown protein	CM0601.44_at	1.67933	0.0127033
Lotus japonicus similar to At5g67240: unknown protein	chr1.CM0378.22_at	-0.0258805	0.993494
Lotus japonicus similar to At5g67240: unknown protein	chr1.CM0378.23_at	-0.033083	0.989148
Lotus japonicus similar to At2g36530: enolase (2-phospho-D-glycerate hydroylase)	chr1.CM0378.25_at	-0.292981	0.309417
Lotus japonicus similar to At5g42820: U2 snRNP auxiliary factor, small subunit	chr1.CM0378.26_at	-0.0774764	0.906361
Lotus japonicus similar to Q9SJQ7: (Q9SJQ7) AT2G36480 PROTEIN	chr1.CM0378.27_at	-0.0373106	0.965156
Lotus japonicus similar to At2g36490: hypothetical protein	chr1.CM0378.28_at	-0.121766	0.793895
Lotus japonicus similar to At5g03740: histone deacetylase -like protein	chr1.CM0378.29_at	-0.228254	0.441634
Lotus japonicus similar to At5g03730: SERINE THREONINE-PROTEIN KINASE CTR1	chr1.CM0378.33_at	0.316643	0.36646
Lotus japonicus similar to At2g36475: hypothetical protein	chr1.CM0378.34_at	0.00397829	0.999999
Lotus japonicus similar to At1g02860: unknown protein	Ljwgs_048658.2_at	1.67626	0.00254819
Lotus japonicus similar to At5g03680: GT2 -like protein	chr1.CM0378.38_at	0.0534818	0.935059
Lotus japonicus similar to At3g57490: 40S ribosomal protein S2 homolog	chr1.CM0378.4_at	-0.563664	0.110658
Lotus japonicus similar to At5g04550: unknown protein	chr1.CM0378.5_at	0.501619	0.212239
Lotus japonicus similar to At3g10020: unknown protein	chr1.CM0378.6_at	0.000714329	0.999999
Lotus japonicus similar to At1g49270: hypothetical protein	chr1.CM0378.7_x_at	-0.0219105	0.982852
Lotus japonicus similar to At2g36540: hypothetical protein	chr1.CM0378.8_at	0.00933707	0.994741
Lotus japonicus similar to At3g59820: putative protein	chr1.CM0393.13_at	0.0358489	0.984217
Lotus japonicus similar to At1g02880: unknown protein	chr1.CM0393.14_at	0.0928869	0.390357
Lotus japonicus similar to At3g60200: unknown protein (At3g60200)	chr1.CM0393.17_at	0.278283	0.45843
Lotus japonicus similar to At1g65295: unknown protein	chr1.CM0393.2_at	-0.161234	0.368648
Lotus japonicus similar to At3g59820: putative protein	chr1.CM0393.20_at	0.114567	0.834382
Lotus japonicus similar to At1g65540: hypothetical protein	chr1.CM0393.22_at	-0.0939445	0.821533
Lotus japonicus similar to At4g03410: unknown protein	chr3.CM0711.41.2_at	1.67531	0.0291342
Lotus japonicus similar to At1g02880: unknown protein	chr1.CM0393.27_at	-0.0468375	0.872967
Lotus japonicus similar to At5g61240: Cf-5 disease resistance protein - like	chr1.CM0393.3_s_at	-0.366394	0.265837
Lotus japonicus similar to At1g65530: hypothetical protein	chr1.CM0393.30_at	0.0235476	0.99009
Lotus japonicus similar to At3g09850: putative protein	chr1.CM0393.33_x_at	0.472339	0.110305
Lotus japonicus similar to ALB2_PEA: (P08688) ALBUMIN 2 (PA2)	chr1.CM0393.38_s_at	0.631006	0.982359
Lotus japonicus similar to Q39659: (Q39659) TETRAFUNCTIONAL PROTEIN	chr1.CM0393.39_at	0.410035	0.20612
Lotus japonicus similar to ALB2_PEA: (P08688) ALBUMIN 2 (PA2)	chr1.CM0393.40_at	0.599079	0.989026
Lotus japonicus similar to At4g33490: nucellin -like protein	chr4.TM0844.24_at	1.67356	0.00220039
Lotus japonicus similar to At1g44750: Unknown protein (At1g44750)	chr1.CM0393.41_s_at	0.15596	0.936503
Lotus japonicus similar to At1g44750: Unknown protein (At1g44750)	chr1.CM0393.41_x_at	0.261134	0.467231
Lotus japonicus similar to At1g44750: Unknown protein (At1g44750)	chr1.CM0393.42_at	0.691091	0.0924497
Lotus japonicus similar to At1g44750: Unknown protein (At1g44750)	chr1.CM0393.42_s_at	0.437253	0.144964
Lotus japonicus similar to At1g44750: Unknown protein (At1g44750)	chr1.CM0393.43_x_at	0.25491	0.429545
Lotus japonicus similar to At1g44750: Unknown protein (At1g44750)	chr1.CM0393.47.1_x_at	0.0318467	0.840906
Lotus japonicus similar to THI4_ALNGL: (Q38709) THIAZOLE BIOSYNTHETIC ENZYME, CHLOROPLA	chr1.CM0393.50_at	0.00546966	0.997443
Lotus japonicus similar to THI4_ALNGL: (Q38709) THIAZOLE BIOSYNTHETIC ENZYME, CHLOROPLA	chr1.CM0393.50_x_at	-0.0702752	0.856859
Lotus japonicus similar to At1g36675: putative protein	chr1.CM0393.52_x_at	-0.0032439	0.999999
BP060749 Lotus corniculatus var. japonicus mature nodule Lotus corniculatus var. japonicus cDNA clone GENf056g04 3 , mRNA sequence reverse complement	gi45617497_at	1.67251	0.0218712
Lotus japonicus similar to At5g13750: transporter-like protein	Ljwgs_049772.1_at	1.6683	0.0254522
Lotus japonicus similar to At5g25560: unknown protein	chr1.CM0760.8_at	1.66299	0.00534825
Lotus japonicus similar to O81348: (O81348) SYMBIOTIC AMMONIUM TRANSPORTER	chr1.CM0393.64_at	0.0654336	0.993839
Lotus japonicus similar to At5g48380: receptor-like protein kinase	chr1.CM0393.75_at	0.661045	0.080484
Lotus japonicus similar to At5g04040: unknown protein	chr1.CM0398.12_at	-1.24576	0.139711
Lotus japonicus similar to At5g13750: transporter-like protein	chr1.CM0001.70.2_at	1.6598	0.0219658
Lotus japonicus similar to At1g52790: putative oxidoreductase	chr1.CM0398.21_at	-0.00358884	0.996636
Lotus japonicus similar to GST1_LYCES: (P27057) GAST1 PROTEIN PRECURSOR	chr1.CM0398.23.1_at	-1.09343	0.500398
Lotus japonicus similar to At3g57170: unknown protein	chr1.CM0398.24.1_at	-0.489548	0.308124
Lotus japonicus similar to YF54_AQUAE: (O67506) PUTATIVE ALDOLASE AQ_1554 (EC 4.2.1.-)	chr1.CM0398.25_at	-0.011069	0.97066
Lotus japonicus similar to At2g41450: hypothetical protein	chr1.CM0398.26.1_at	-0.129669	0.504134
Lotus japonicus similar to ACOC_CUCMA: (P49608) ACONITATE HYDRATASE, CYTOPLASMIC (EC 4.	chr1.CM0398.26.2_at	-0.359899	0.0974158
Lotus japonicus similar to At5g48050: putative protein	chr1.CM0398.29.1_s_at	-0.00602608	0.98633
Lotus japonicus similar to At3g57180: unknown protein	chr1.CM0398.33_at	-0.371094	0.268841
Lotus japonicus similar to Q9LKW3: (Q9LKW3) DEHYDRATION-INDUCED PROTEIN ERD15	chr1.CM0398.34_at	-0.0448608	0.994621
Lotus japonicus similar to Q9SWP6: (Q9SWP6) HYPERSENSITIVE REACTION ASSOCIATED CA2+-BIN	chr1.CM0121.35_at	1.65882	0.00681884
Lotus japonicus similar to Q9MFD2: (Q9MFD2) ORF764 PROTEIN	chr1.CM0398.36.2_x_at	-0.0258958	0.976699
Lotus japonicus similar to Q9M2N0: (Q9M2N0) HYPOTHETICAL 29.6 KDA PROTEIN	chr1.CM0398.36.3_at	-0.152066	0.400859
Lotus japonicus similar to At3g21690: integral membrane protein, putative	chr1.CM0398.38_s_at	-0.0965607	0.885956
Lotus japonicus similar to At4g02280: putative sucrose synthetase	chr1.TM1573.7_at	1.65868	3.33821e-05
Lotus japonicus similar to At1g52800: putative oxidoreductase	chr1.CM0398.5_s_at	-0.066315	0.757452
Lotus japonicus similar to At1g52800: putative oxidoreductase	chr1.CM0398.5_x_at	0.0725134	0.497696
Lotus japonicus similar to At3g10190: calmodulin-like protein	chr1.CM0398.9_at	0.305257	0.760822
Lotus japonicus similar to At5g39050: Anthocyanin acyltransferase - like protein	chr1.CM0410.11.2_at	0.0895567	0.840544
Lotus japonicus similar to At3g17590: unknown protein	chr1.CM0410.15.1_at	0.0989925	0.510854
Lotus japonicus similar to At2g47510: putative fumarase	chr1.CM0410.15_s_at	-0.091314	0.917337
Lotus japonicus similar to At3g15350: unknown protein	Ljwgs_054325.1_at	1.65518	0.013359
Lotus japonicus similar to O48631: (O48631) ETHYLENE-FORMING-ENZYME-LIKE DIOXYGENASE	chr4.CM0219.29_at	1.6524	0.021257
Lotus japonicus similar to At5g60980: ras-GTPase-activating protein SH3-domain binding protein - like	chr1.CM0410.22_at	-1.0202	0.0823633
Lotus japonicus similar to At3g29575: unknown protein	chr1.CM0410.27_at	1.09012	0.190497
Lotus japonicus similar to At3g02130: protein kinase like protein	chr1.CM0410.29.1_at	0.238272	0.385579
Lotus japonicus similar to O64406: (O64406) ENVELOPE-LIKE PROTEIN (FRAGMENT)	chr1.CM0410.3.1_x_at	-0.00629864	0.999999
Lotus japonicus similar to At5g15870: putative protein	chr1.CM0410.32_at	0.348476	0.647253
Lotus japonicus similar to At1g20390: hypothetical protein	chr1.CM0410.35_x_at	-0.0263736	0.994594
Lotus japonicus similar to At3g02110: serine carboxypeptidase II like protein	chr1.CM0410.39_at	-0.198254	0.658729
Lotus japonicus similar to At3g02110: serine carboxypeptidase II like protein	chr1.CM0410.41_at	-0.150346	0.887507
Lotus japonicus similar to At3g29400: unknown protein (At3g29400)	chr1.CM0410.43_at	0.318762	0.178324
Lotus japonicus similar to At5g61030: RNA-binding protein - like	chr1.CM0410.45_at	0.0214949	0.999977
Lotus japonicus similar to Q9LIA4: (Q9LIA4) GENOMIC DNA, CHROMOSOME 3, P1 CLONE:MUO10	chr1.CM0410.46.1_at	-0.0566432	0.955286
Lotus japonicus similar to Q9LIA4: (Q9LIA4) GENOMIC DNA, CHROMOSOME 3, P1 CLONE:MUO10	chr1.CM0410.46_at	-0.2113	0.676297
Lotus japonicus similar to At3g29390: unknown protein	chr1.CM0410.48_at	-0.0472058	0.979286
Lotus japonicus similar to At5g65360: histone H3 (sp|P05203)	chr1.CM0410.50_at	-2.07397	0.0862862
Lotus japonicus similar to At5g65360: histone H3 (sp|P05203)	chr1.CM0410.50_x_at	-2.10882	0.0804471
Lotus japonicus similar to At1g69830: alpha-amylase like protein	chr1.CM0410.51_at	0.151394	0.572103
Lotus japonicus similar to At1g70330: unknown protein (At1g70330)	chr1.CM0410.55_s_at	-0.15591	0.395699
Lotus japonicus similar to Q9XHG2: (Q9XHG2) FLAVONOL SYNTHASE	Ljwgs_070148.1_at	1.64911	0.000151891
Lotus japonicus similar to At3g29590: Anthocyanin 5-aromatic acyltransferase, putative	chr1.CM0410.6_at	0.148445	0.849433
Lotus japonicus similar to Q9FUJ6: (Q9FUJ6) UDP-GLUCOSYLTRANSFERASE HRA25	chr1.CM0410.60_at	0.241811	0.667415
Lotus japonicus similar to Q9FUJ6: (Q9FUJ6) UDP-GLUCOSYLTRANSFERASE HRA25	chr1.CM0410.62_at	-0.278032	0.717004
Lotus japonicus similar to Q9FUJ6: (Q9FUJ6) UDP-GLUCOSYLTRANSFERASE HRA25	chr1.CM0410.62_s_at	0.215601	0.435155
Lotus japonicus similar to Q9FUJ6: (Q9FUJ6) UDP-GLUCOSYLTRANSFERASE HRA25	chr1.CM0410.64_at	1.01518	0.114413
Lotus japonicus similar to Q9BBU5: (Q9BBU5) CU ZN-SUPEROXIDE DISMUTASE COPPER CHAPERONE	Ljwgs_036445.1_at	1.64832	0.00941472
Lotus japonicus similar to At4g24480: putative protein kinase	chr1.CM0410.78.1_s_at	-0.0433965	0.973264
Lotus japonicus similar to At5g39090: acyltransferase -like protein	chr1.CM0410.9_at	0.0430756	0.835593
Lotus japonicus similar to At5g25100: putative multispanning membrane protein	chr1.CM0433.1.1_at	-0.661244	0.155879
Lotus japonicus similar to At1g19440: very-long-chain fatty acid condensing enzyme CUT1 like protein	Ljwgs_059039.1_at	1.64785	9.99479e-05
Lotus japonicus similar to At5g25150: transcription initiation factor IID-associated factor-like protein	chr1.CM0433.13.1_at	-0.0973721	0.868843
Lotus japonicus similar to At5g25150: transcription initiation factor IID-associated factor-like protein	chr1.CM0433.13_at	-0.261063	0.586291
Lotus japonicus similar to At5g25610: dehydration-induced protein RD22	chr1.CM0433.18_at	0.56386	0.682909
Lotus japonicus similar to At2g15690: unknown protein	chr1.CM0433.21_at	0.326778	0.586451
Lotus japonicus similar to At2g25140: putative ATP-dependent CLPB protein	chr1.CM0433.22_at	0.252143	0.437482
Lotus japonicus similar to At2g25140: putative ATP-dependent CLPB protein	chr1.CM0433.27.1_at	0.559024	0.260285
Lotus japonicus similar to At2g25140: putative ATP-dependent CLPB protein	chr1.CM0433.27.1_x_at	-0.314474	0.565771
Lotus japonicus similar to At5g25150: transcription initiation factor IID-associated factor-like protein	chr1.CM0433.27_at	0.0332728	0.955223
Lotus japonicus similar to At2g25620: protein phosphatase 2C like protein	chr6.TM0317.9_at	1.6453	0.002541
Lotus japonicus similar to Q9LLI0: (Q9LLI0) CLPB	chr1.CM0433.30_at	-0.232952	0.272236
Lotus japonicus similar to At2g25110: unknown protein	chr1.CM0433.33_at	-0.172845	0.492006
Lotus japonicus similar to At4g31880: unknown protein	chr1.CM0433.34.1_at	0.0749887	0.726217
Lotus japonicus similar to At4g31880: unknown protein	chr1.CM0433.34_at	0.0114204	0.999999
Lotus japonicus similar to At4g31890: unknown protein	chr1.CM0433.35_at	-0.650802	0.18057
Lotus japonicus similar to Q9LK40: (Q9LK40) DNA-DIRECTED RNA POLYMERASE, SUBUNIT B	chr1.CM0433.4.1_at	-0.183781	0.737514
Lotus japonicus similar to At3g23780: DNA-directed RNA polymerase subunit, putative	chr1.CM0433.4_at	-0.00213428	0.999999
Lotus japonicus similar to Q9ATK7: (Q9ATK7) CAFFEOYL-COA 3-O-METHYLTRANSFERASE	Ljwgs_021886.2_at	1.63945	0.000838917
Lotus japonicus similar to Q9MBB8: (Q9MBB8) POLYGALACTURONASE	chr1.CM0442.11_at	0.00137041	0.999999
Lotus japonicus similar to Q9MBB8: (Q9MBB8) POLYGALACTURONASE	chr1.CM0442.11_s_at	0.00637433	0.999355
Lotus japonicus similar to At1g64870: hypothetical protein	chr1.CM0442.13_at	-0.0160192	0.922482
Lotus japonicus similar to At5g11270: unknown protein	chr1.CM0442.14_at	-0.136633	0.554772
Lotus japonicus similar to At4g32410: cellulose synthase catalytic subunit (RSW1)	chr1.CM0442.15_at	-0.221449	0.601736
Lotus japonicus similar to At4g32400: adenylate translocator (brittle-1) - like protein	chr1.CM0442.17_at	-0.253909	0.36093
Lotus japonicus similar to At3g16770: AP2 domain containing protein RAP2.3	chr1.CM0442.18_s_at	0.418142	0.283734
Lotus japonicus similar to At5g11280: unknown protein	chr1.CM0442.19_at	-0.294754	0.166177
Lotus japonicus similar to PAL1_SOYBN: (P27991) PHENYLALANINE AMMONIA-LYASE 1 (EC 4.3.1	chr1.CM0442.2_s_at	-0.127397	0.996297
Lotus japonicus similar to At3g15680: putative zinc finger protein	chr1.CM0442.20_at	-0.923259	0.127838
Lotus japonicus similar to At5g20060: unknown protein	chr1.CM0442.22_at	-0.325674	0.683064
Lotus japonicus similar to At2g32520: putative carboxymethylenebutenolidase	chr1.CM0442.24_at	-0.114179	0.918225
Lotus japonicus similar to At1g64940: hypothetical protein	chr1.CM0442.26.2_at	-0.0386664	0.713005
Lotus japonicus similar to At5g28892: putative protein	chr1.CM0442.26_s_at	-0.151535	0.752484
Lotus japonicus similar to At5g28892: putative protein	chr1.CM0442.26_x_at	0.89973	0.571242
Lotus japonicus similar to At4g32440: unknown protein	chr1.CM0442.28_at	0.789303	0.255028
Lotus japonicus similar to At5g55190: salt stress inducible small GTP binding protein Ran1 homolog	chr1.CM0442.29.2_s_at	-0.0555345	0.767306
Lotus japonicus similar to At4g32420: cyclophilin (AtCYP95)	chr1.CM0442.29_at	-0.0983621	0.731244
Lotus japonicus similar to At5g32450: unknown protein	chr1.CM0442.30.1_at	0.219683	0.396213
Lotus japonicus similar to At2g26650: K+ transporter, AKT1	chr1.CM0442.35.1_at	0.00477841	0.992973
Lotus japonicus similar to O24382: (O24382) POTASSIUM CHANNEL	chr1.CM0442.35_at	0.425749	0.141985
Lotus japonicus similar to At3g62800: unknown protein	chr1.CM0442.37_at	0.0708808	0.774532
Lotus japonicus similar to Q9XE26: (Q9XE26) HYPOTHETICAL 170.8 KDA PROTEIN	chr1.CM0442.4.1_at	-0.154824	0.598893
Lotus japonicus hypothetical protein	chr1.CM0442.4_at	0.332009	0.55316
Lotus japonicus similar to At2g25540: cellulose synthase catalytic subunit like protein	chr1.CM0442.7_s_at	-0.247366	0.733581
Lotus japonicus similar to At4g32390: putative protein	chr1.CM0442.9.1_at	-0.344779	0.224302
Lotus japonicus similar to At5g11230: putative protein	chr1.CM0442.9_at	-0.152553	0.609442
Lotus japonicus similar to At4g29665: unknown protein	chr1.CM0476.12_at	0.0598245	0.883611
Lotus japonicus similar to At1g09020: putative activator subunit of SNF1-related protein kinase SNF4	chr1.CM0476.15_at	0.293213	0.284364
Lotus japonicus similar to At1g55040: putative protein	chr1.CM0476.2_at	-0.07553	0.851305
Lotus japonicus similar to At5g66540: unknown protein	chr1.CM0476.21_at	0.0527554	0.977232
Lotus japonicus similar to At5g03710: putative protein	chr1.CM0476.22_at	-0.0488921	0.972937
Lotus japonicus similar to At1g29670: lipase hydrolase-like protein	chr1.CM0476.23.1_x_at	0.09372	0.929193
Lotus japonicus hypothetical protein	chr1.CM0476.27_at	0.0271976	0.876568
Lotus japonicus similar to BAB56037: (BAB56037) PUTATIVE GDSL-MOTIF LIPASE HYDROLASE-LI	chr1.CM0476.31_at	0.00187913	0.999999
Lotus japonicus hypothetical protein	chr1.CM0476.34.1_at	-0.0107422	0.962709
Lotus japonicus similar to At3g23880: unknown protein	chr1.CM0476.41_at	0.328497	0.521187
Lotus japonicus similar to At5g24460: unknown protein	chr1.CM0476.48_at	1.06631	0.0557411
Lotus japonicus similar to At2g02160: unknown protein	chr1.CM0476.49.1_at	0.00735812	0.985369
Lotus japonicus similar to At5g24460: unknown protein	chr1.CM0476.49_at	0.0401177	0.95424
Lotus japonicus similar to Q9M610: (Q9M610) TTG1-LIKE PROTEIN	chr1.CM0476.53_at	0.380415	0.226665
Lotus japonicus hypothetical protein	chr1.CM0476.54_x_at	0.202837	0.559652
Lotus japonicus similar to At3g05380: unknown protein	chr1.CM0476.7_at	0.0822525	0.833524
Lotus japonicus similar to At3g21430: unknown protein	chr1.CM0476.9_at	0.128595	0.783382
Lotus japonicus similar to At4g37680: putative protein	chr2.CM0168.14_at	1.63852	0.011944
Lotus japonicus similar to Q9KK35: (Q9KK35) SURFACE PROTEIN PSPC	chr1.CM0496.11.2_at	0.167139	0.683439
Lotus japonicus similar to At2g36230: phosphoribosylformimino-5-aminoimidazole carboxamide ribotide isomerase	chr1.CM0496.11_at	-0.59478	0.116736
Lotus japonicus similar to At5g53440: putative protein	chr1.CM0496.12_at	-0.152891	0.728523
Lotus japonicus similar to At2g17550: hypothetical protein	Ljwgs_047704.1_at	1.63789	0.00457301
Lotus japonicus similar to At5g06160: splicing factor 3a	chr1.CM0496.15_at	-0.0436305	0.875942
Lotus japonicus similar to Q9XEY7: (Q9XEY7) TREHALASE 1 GMTRE1	Ljwgs_031495.1_at	1.63758	0.00199308
Lotus japonicus similar to At1g31910: hypothetical protein	chr1.CM0496.23.1_at	0.349375	0.146092
Lotus japonicus similar to Q9LTD7: (Q9LTD7) SIMILARITY TO UNKNOWN PROTEIN	chr1.CM0496.24_at	0.0595336	0.958755
Lotus japonicus similar to Q9LTD7: (Q9LTD7) SIMILARITY TO UNKNOWN PROTEIN	chr1.CM0496.24_x_at	-0.154304	0.778674
Lotus japonicus similar to At3g52210: unknown protein	chr1.CM0496.32_at	0.195717	0.709363
Lotus japonicus similar to At5g04550: unknown protein	chr1.CM0496.35.1_at	0.000481968	0.999999
Lotus japonicus similar to At5g04550: unknown protein	chr1.CM0496.36_at	-0.174128	0.717566
Lotus japonicus similar to O64406: (O64406) ENVELOPE-LIKE PROTEIN (FRAGMENT)	chr1.CM0496.39_at	0.016621	0.991495
Lotus japonicus similar to At3g52210: unknown protein	chr1.CM0496.41_at	-0.277503	0.511115
Lotus japonicus similar to At3g04950: unknown protein	chr1.CM0544.1_at	-0.105805	0.577304
Lotus japonicus similar to Q9ZNQ4: (Q9ZNQ4) SUPEROXIDE DISMUTASE (EC 1.15.1.1) (CU-ZN)	chr1.CM0544.12_at	0.642411	0.291233
Lotus japonicus similar to At5g27240: putative protein	chr1.CM0544.13.1_at	0.198868	0.620803
Lotus japonicus similar to At1g68830: putative protein kinase	chr1.CM0544.13_at	0.158233	0.803752
Lotus japonicus similar to At5g27240: putative protein	chr1.CM0544.15_at	-0.259044	0.373777
Lotus japonicus similar to At3g04970: unknown protein, contains TNFR NGFR cysteine-rich region	chr1.CM0544.16_at	0.0515444	0.964084
Lotus japonicus similar to At1g08860: hypothetical protein	chr1.CM0544.17_at	-0.167554	0.837627
Lotus japonicus similar to At3g05090: unknown protein	chr1.CM0544.2_at	0.303133	0.256251
Lotus japonicus similar to At3g04970: unknown protein, contains TNFR NGFR cysteine-rich region	chr1.CM0544.20.1_at	-0.189644	0.744519
Lotus japonicus similar to At5g27290: unknown protein	chr1.CM0544.21_at	0.258712	0.448685
Lotus japonicus similar to At1g54690: unknown protein	chr1.CM0544.22_at	-1.35362	0.0735491
Lotus japonicus similar to At5g18840: sugar transporter - like protein	chr1.CM0544.28_at	0.132475	0.862477
Lotus japonicus similar to At1g05070: unknown protein	chr1.CM0544.32.1_at	-0.433276	0.514273
Lotus japonicus similar to At1g02840: ribonucleoprotein SF-2 like protein	Ljwgs_070944.1_s_at	1.63695	0.00837172
Lotus japonicus similar to At2g21620: RD2 protein (RD2)	chr1.CM0113.54_at	1.63519	0.000960277
Lotus japonicus similar to At3g63480: kinesin heavy chain - like protein	chr1.CM0544.36_at	0.0103644	0.957717
Lotus japonicus similar to Q42369: (Q42369) CONGLUTIN GAMMA PRECURSOR	chr1.CM0544.37_at	-0.00536625	0.989054
Lotus japonicus similar to At1g72770: protein phosphatase 2C (AtP2C-HA)	chr1.CM0544.40_s_at	0.352857	0.39667
Lotus japonicus similar to At1g08970: transcription factor like protein	chr1.CM0544.44_at	0.800802	0.0752114
Lotus japonicus similar to At5g27450: mevalonate kinase	chr1.CM0544.47_at	-0.0758179	0.886562
Lotus japonicus similar to At5g27400: unknown protein	chr1.CM0544.49.1_at	-0.264268	0.294412
Lotus japonicus similar to At3g05240: hypothetical protein	chr1.CM0544.49_at	0.254067	0.459411
Lotus japonicus similar to At5g27490: putative protein	chr1.CM0544.51_at	-0.0347946	0.941899
Lotus japonicus similar to At1g72210: putative bHLH transcription factor (bHLH096)	chr1.CM0544.52.2_at	-0.351374	0.657992
Lotus japonicus similar to At5g19250: unknown protein	chr1.CM0544.52_at	-0.0850621	0.846033
Lotus japonicus similar to At1g20390: hypothetical protein	chr1.CM0544.55_x_at	0.131725	0.581204
Lotus japonicus similar to At1g61800: Similar to glucose-6-phosphate phosphate-translocator	chr6.CM0139.68.2_at	1.63093	0.0297507
Lotus japonicus similar to At5g27400: unknown protein	chr1.CM0544.61.1_at	-0.252326	0.132086
Lotus japonicus similar to At5g27430: signal peptidase	chr1.CM0544.61_at	-0.0702678	0.793283
Lotus japonicus similar to At3g63480: kinesin heavy chain - like protein	chr1.CM0544.63_at	-0.108023	0.473877
Lotus japonicus similar to At5g27420: RING-H2 zinc finger protein-like	chr1.CM0544.65.1_at	0.217296	0.955352
Lotus japonicus similar to At1g09010: putative Bos beta-mannosidase	chr1.CM0544.68_at	0.359228	0.203047
Lotus japonicus similar to At5g58770: dehydrodolichyl diphosphate - like protein	Ljwgs_057459.1_at	1.62811	0.0257416
nad5 -mitochondrial genome-	chr4.CM0100.34.1_s_at	1.62755	0.0146254
Lotus japonicus similar to Q9ARW5: (Q9ARW5) P0503E05.11 PROTEIN	chr1.CM0544.9_at	-0.259786	0.207342
Lotus japonicus similar to At1g67410: unknown protein	chr1.CM0579.12.1_s_at	-0.421241	0.0803351
Lotus japonicus similar to At3g66658: betaine aldehyde dehydrogenase like protein	chr1.CM0579.16_at	-0.259027	0.749425
Lotus japonicus similar to O49163: (O49163) NADPH HC TOXIN REDUCTASE	chr1.CM0579.2_at	-0.792677	0.106977
Lotus japonicus similar to At2g33510: unknown protein	chr1.CM0579.21_at	-0.765105	0.419936
Lotus japonicus hypothetical protein	chr1.CM0579.30.1_at	-0.00128568	0.999999
Lotus japonicus similar to At2g46370: putative auxin-responsive protein	chr1.CM0579.32_at	0.423374	0.548309
Lotus japonicus similar to At3g13110: serine acetyltransferase (Sat-1)	TM1680.19.1_at	1.62617	0.000361332
Lotus japonicus similar to At5g41760: CMP-sialic acid transporter-like protein	chr1.CM0579.37_at	0.310562	0.109407
Lotus japonicus similar to At5g41760: CMP-sialic acid transporter-like protein	chr1.CM0579.37_s_at	-0.0661546	0.761858
Lotus japonicus similar to At2g46320: unknown protein	chr1.CM0579.39_at	0.270688	0.407149
Lotus japonicus similar to At4g10770: oligopeptide transporter like protein	Ljwgs_075094.1_at	1.62457	0.0176359
Lotus japonicus similar to Q41109: (Q41109) REGULATOR OF MAT2	chr1.CM0579.41_at	0.402946	0.38017
Lotus japonicus similar to Q43450: (Q43450) G-BOX BINDING FACTOR (FRAGMENT)	chr1.CM0579.43_at	0.292996	0.588883
<not provided>	TC12206_at	1.62329	0.000386109
Lotus japonicus similar to At4g37980: cinnamyl-alcohol dehydrogenase ELI3-1 (mannitol dehydrogenase)	Ljwgs_026772.2_x_at	1.61785	0.000460655
Lotus japonicus similar to At3g61600: POZ BTB containing-protein AtPOB1	chr1.CM0579.46_at	0.0399071	0.945046
Lotus japonicus similar to At5g41620: unknown protein	chr1.CM0579.47_at	-1.08477	0.0624095
Lotus japonicus similar to At3g61610: unknown protein	chr1.CM0579.48_at	-0.347066	0.540972
Lotus japonicus similar to At3g61620: exonuclease RRP41	chr1.CM0579.49_at	0.150459	0.731091
Lotus japonicus similar to At3g61610: unknown protein	chr1.CM0579.50_at	-0.275558	0.747952
Lotus japonicus similar to Q9MAY4: (Q9MAY4) ABC TRANSPORTER HOMOLOG	Ljwgs_128679.1_at	1.61264	0.0165763
Lotus japonicus similar to At3g66658: betaine aldehyde dehydrogenase like protein	chr1.CM0579.6_at	0.00486101	0.999999
Lotus japonicus similar to At4g01080: unknown protein (At4g01080)	chr1.CM0579.7_at	-0.049055	0.891569
Lotus japonicus similar to At3g61670: putative protein	chr1.CM0579.8_at	0.355779	0.213843
Lotus japonicus similar to At3g22680: unknown protein	chr1.CM0591.10_at	-0.0880246	0.89108
Lotus japonicus similar to At4g14790: RNA helicase like protein	chr1.CM0591.11.1_at	-0.360871	0.770225
Lotus japonicus similar to At3g22690: hypothetical protein	chr1.CM0591.11_at	-0.628236	0.17222
Lotus japonicus similar to At3g22690: hypothetical protein	chr1.CM0591.11_s_at	-0.232747	0.691481
Lotus japonicus similar to Q9AVK9: (Q9AVK9) 12-OXOPHYTODIENOIC ACID 10, 11-REDUCTASE	chr1.CM0591.12_at	0.0131761	0.999999
Lotus japonicus similar to At1g20850: putative cysteine proteinase	TM0674.9.1_at	1.60516	0.0160249
Lotus japonicus similar to Q9AVK9: (Q9AVK9) 12-OXOPHYTODIENOIC ACID 10, 11-REDUCTASE	chr1.CM0591.13.1_x_at	0.582775	0.17533
Lotus japonicus similar to At2g17220: protein kinase like protein	chr4.CM0244.72_at	1.60508	0.0135154
Lotus japonicus similar to At1g76690: 12-oxophytodienoate reductase (OPR2)	chr1.CM0591.14_at	0.0410618	0.654584
Lotus japonicus similar to Q9AVK9: (Q9AVK9) 12-OXOPHYTODIENOIC ACID 10, 11-REDUCTASE	chr1.CM0591.17_at	0.559504	0.0683264
Lotus japonicus similar to Q43427: (Q43427) DNA-BINDING PROTEIN	chr4.CM0170.23_at	1.60343	0.00198503
Lotus japonicus similar to P93699: (P93699) CPRD8 PROTEIN	chr1.CM0591.23.1_at	0.089208	0.957042
Lotus japonicus similar to At1g05470: unknown protein	chr1.CM0591.27_at	0.344668	0.2208
Lotus japonicus similar to At5g65210: bZip transcription factor TGA1 AtbZip47	Ljwgs_064903.1_at	1.60205	0.00833312
Lotus japonicus similar to At1g05460: unknown protein	chr1.CM0591.29_at	0.0633099	0.816081
Lotus japonicus similar to At4g14770: hypothetical protein	chr1.CM0591.3_at	-2.1139	0.139224
Lotus japonicus similar to At4g14805: putative protein	chr1.CM0591.30_at	-0.0156946	0.919111
Lotus japonicus similar to At3g57680: carboxyl terminal protease - like protein	Ljwgs_020349.1_at	1.59946	0.00304195
Lotus japonicus similar to At3g22611: predicted GPI-anchored protein	chr1.CM0591.35_s_at	-0.248439	0.738819
Lotus japonicus similar to At4g14500: unknown protein	chr1.CM0591.36_at	-0.114603	0.718354
Lotus japonicus similar to At3g22600: predicted GPI-anchored protein	chr1.CM0591.38.1_at	-0.112656	0.972779
Lotus japonicus similar to CHSY_PUELO: (P23569) CHALCONE SYNTHASE (EC 2.3.1.74) (NARING	chr1.CM0591.39_x_at	0.185554	0.949106
Lotus japonicus similar to At1g52960: hypothetical protein	chr1.CM0591.4_x_at	0.0266915	0.948764
Lotus japonicus similar to CHS4_MEDSA: (P30075) CHALCONE SYNTHASE 4 (EC 2.3.1.74) (NARI	chr1.CM0591.40_x_at	0.0767679	0.99009
Lotus japonicus similar to CHSY_PUELO: (P23569) CHALCONE SYNTHASE (EC 2.3.1.74) (NARING	chr1.CM0591.42_x_at	0.501881	0.367791
Lotus japonicus similar to At5g43630: unknown protein	chr1.CM0591.43_at	0.151232	0.776402
Lotus japonicus similar to At1g64980: hypothetical protein	chr1.CM0591.44_at	0.0128838	0.999999
Lotus japonicus similar to P93365: (P93365) IMMEDIATE-EARLY SALICYLATE-INDUCED GLUCOSYL	chr1.CM0591.45.1_at	-0.0173543	0.961134
Lotus japonicus similar to Q43589: (Q43589) PAR-1C	chr5.CM0148.44_at	1.59306	0.0247328
Lotus japonicus similar to At3g02900: unknown protein	chr1.CM0591.46_at	-0.176711	0.463138
Lotus japonicus similar to At5g16120: lipase-like protein	Ljwgs_035973.1_at	1.5925	0.00492103
Lotus japonicus similar to At5g13270: putative protein	chr1.CM0591.47_at	0.487164	0.0602589
Lotus japonicus similar to At1g06710: hypothetical protein	chr1.CM0591.48.1_at	0.0669717	0.833192
Lotus japonicus similar to At1g11760: unknown protein	chr1.CM0591.48_at	0.591188	0.0673256
Lotus japonicus hypothetical protein	chr4.CM0179.53_x_at	1.59151	0.0305041
Lotus japonicus similar to At5g07330: unknown protein	chr1.CM0591.5_at	-0.00780877	0.999999
Lotus japonicus similar to At1g65020: hypothetical protein, 3 partial	chr1.CM0591.50.1_at	0.252864	0.100794
Lotus japonicus similar to At5g16730: putative protein	chr1.CM0591.50_at	-1.23432	0.0998019
Lotus japonicus similar to Q40983: (Q40983) METALLOENDOPEPTIDASE	chr1.CM0591.53_at	0.108428	0.610988
Lotus japonicus similar to At5g42390: pitrilysin	chr1.CM0591.54_at	0.113017	0.711396
Lotus japonicus similar to Q40983: (Q40983) METALLOENDOPEPTIDASE	chr1.CM0591.55.1_at	-0.0816167	0.968856
Lotus japonicus similar to Q40983: (Q40983) METALLOENDOPEPTIDASE	chr1.CM0591.55_at	-0.172897	0.912238
Lotus japonicus similar to At5g16800: unknown protein	chr1.CM0591.56_at	0.635419	0.310456
Lotus japonicus similar to At5g16810: unknown protein	chr1.CM0591.57.1_at	-0.246302	0.500637
Lotus japonicus similar to At5g16810: unknown protein	chr1.CM0591.57_at	-0.127248	0.715945
Lotus japonicus similar to Q9SML3: (Q9SML3) CYTOCHROME P450 MONOOXYGENASE (FRAGMENT)	chr1.CM0591.58_at	0.947232	0.101496
Lotus japonicus similar to At3g22750: putative protein kinase	chr1.CM0591.6_at	0.614571	0.162198
Lotus japonicus similar to At1g54200: unknown protein	chr5.TM0090.3_at	1.59043	0.00502191
Lotus japonicus similar to At3g08950: putative SCO1 protein	chr1.CM0591.7_at	-0.162427	0.644768
Lotus japonicus similar to At3g08950: putative SCO1 protein	chr1.CM0591.7_s_at	0.155438	0.528448
Lotus japonicus similar to At3g22670: hypothetical protein	chr1.CM0591.9_at	0.0967094	0.949074
Lotus japonicus hypothetical protein	chr1.CM0593.16.3_at	-0.0168377	0.900152
Lotus japonicus similar to At5g60040: DNA-directed RNA polymerase - like protein	chr1.CM0593.19_at	0.44388	0.142593
Lotus japonicus similar to At3g26700: protein kinase -like protein	chr1.CM0593.21_at	-0.730793	0.198377
Lotus japonicus similar to At5g60040: DNA-directed RNA polymerase - like protein	chr1.CM0593.3_at	0.0258772	0.92584
Lotus japonicus similar to At3g19020: hypothetical protein	chr1.CM0593.31.1_x_at	0.0454493	0.954173
Lotus japonicus similar to At5g13930: chalcone synthase (naringenin-chalcone synthase) (testa 4 protein) (sp|P13114)	chr1.CM0593.36_at	0.636537	0.207229
Lotus japonicus similar to At3g17800: unknown protein	TM0286.11_at	1.59019	0.0130198
Lotus japonicus similar to At5g60040: DNA-directed RNA polymerase - like protein	chr1.CM0593.4_at	0.199179	0.740252
Lotus japonicus similar to At2g15690: unknown protein	chr1.CM0593.41.1_at	-0.0130726	0.936298
Lotus japonicus similar to At5g23810: amino acid transporter	Ljwgs_070281.1_at	1.58969	0.026146
Lotus japonicus similar to At5g51050: calcium-binding transporter-like protein	chr1.CM0593.46_at	0.0966328	0.898511
Lotus japonicus similar to At3g13250: hypothetical protein	chr1.CM0593.47_x_at	-0.0151883	0.971315
Lotus japonicus similar to At5g51050: calcium-binding transporter-like protein	chr1.CM0593.48.1_at	0.134334	0.894446
Lotus japonicus similar to Q9M159: (Q9M159) HYPOTHETICAL 49.1 KDA PROTEIN	chr1.CM0593.49_at	0.355445	0.387669
Lotus japonicus similar to At3g02130: protein kinase like protein	chr1.CM0593.5.2_at	-0.0796882	0.847336
Lotus japonicus similar to At3g19330: unknown protein	chr1.CM0593.8.2_at	0.198323	0.543793
Lotus japonicus similar to At5g60040: DNA-directed RNA polymerase - like protein	chr1.CM0593.9.2_at	0.19202	0.661428
Lotus japonicus similar to At2g47790: unknown protein	chr1.CM0600.10.1_at	-0.137444	0.803596
Lotus japonicus similar to At3g04470: unknown protein	chr1.CM0600.12_at	0.0084608	0.994782
Lotus japonicus similar to At5g44040: unknown protein	chr1.CM0600.13_at	-1.95491	0.055592
Lotus japonicus similar to At3g04460: unknown protein	chr1.CM0600.14_at	-0.0565753	0.871432
Lotus japonicus similar to At5g18485: unknown protein	chr1.CM0600.15.1_at	0.288795	0.853842
Lotus japonicus similar to At5g18485: unknown protein	chr1.CM0600.15.1_s_at	0.0672352	0.992918
Lotus japonicus similar to At1g54560:	chr1.CM0600.15.2_at	-0.0614635	0.949643
Lotus japonicus similar to Q9ZQT9: (Q9ZQT9) WERBP-1 PROTEIN	chr1.CM0600.15_at	0.561738	0.170182
Lotus japonicus similar to At5g03970: unknown protein	chr1.CM0600.16_at	0.0733441	0.622454
Lotus japonicus similar to O23959: (O23959) CA+2-BINDING EF HAND PROTEIN	chr1.CM0600.17_at	0.662589	0.27728
Lotus japonicus similar to At3g04490: hypothetical protein	chr1.CM0600.2.1_at	0.054006	0.702785
Lotus japonicus similar to At3g04490: hypothetical protein	chr1.CM0600.2.3_at	-0.0982833	0.816192
Lotus japonicus similar to At3g04490: hypothetical protein	chr1.CM0600.2.4_at	0.15967	0.487805
Lotus japonicus similar to At3g04490: hypothetical protein	chr1.CM0600.2_at	-0.0471411	0.909265
Lotus japonicus similar to At4g19400: unknown protein	chr1.CM0600.20_at	-0.822828	0.0821287
Lotus japonicus similar to At5g18485: unknown protein	chr1.CM0600.21_at	0.0396274	0.998856
Lotus japonicus similar to At1g54560:	chr1.CM0600.22.1_at	-0.0174406	0.944343
Lotus japonicus similar to At1g08730: myosin MYA1, class V (Z28389) like protein	chr1.CM0600.22_at	0.00258501	0.999999
Lotus japonicus similar to At5g28640: unknown protein	chr1.CM0600.27_at	-0.587054	0.624285
Lotus japonicus similar to At3g04510: unknown protein	chr1.CM0600.3_at	0.131167	0.932269
Lotus japonicus similar to At1g08800: unknown protein	chr1.CM0600.32_at	0.402667	0.217491
Lotus japonicus hypothetical protein	chr1.CM0600.34_at	-0.181875	0.680384
Lotus japonicus similar to At3g04630: unknown protein	chr1.CM0600.35.1_at	-0.280296	0.489454
Lotus japonicus similar to At3g04610: putative RNA-binding protein	chr1.CM0600.35_at	0.251185	0.287851
Lotus japonicus similar to At1g44750: Unknown protein (At1g44750)	chr4.CM0831.15_at	1.58487	0.0403827
Lotus japonicus similar to At3g04610: putative RNA-binding protein	chr1.CM0600.39_at	0.215574	0.586236
Lotus japonicus similar to At1g08630: unknown protein	chr1.CM0600.5_at	0.314277	0.48106
Lotus japonicus similar to At1g30270: serine threonine kinase, putative	Ljwgs_048198.2_at	1.58414	0.000599471
Lotus japonicus similar to At1g30910: unknown protein	Ljwgs_084424.1_at	1.58359	0.000748716
Lotus japonicus similar to At2g22170: unknown protein	Ljwgs_008869.2_at	1.58135	0.000116853
Lotus japonicus similar to O04140: (O04140) MYB FACTOR, 1202 BP	chr1.CM0600.9.1_at	-0.00775055	0.990528
Lotus japonicus similar to At2g31180: putative transcription factor (MYB14)	chr1.CM0600.9_at	0.0565059	0.623648
Lotus japonicus similar to O04408: (O04408) ENT-KAURENE SYNTHASE A	chr1.CM0668.21.1_at	0.0605462	0.976713
Lotus japonicus similar to At4g02780: ent-kaurene synthetase A	chr1.CM0668.21_at	-0.0673169	0.970256
Lotus japonicus similar to At5g20250: seed imbitition protein-like	chr1.CM0668.22_s_at	0.00695034	0.999493
Lotus japonicus similar to At3g29760: unknown protein	chr1.CM0668.28_at	0.00196628	0.999999
Lotus japonicus similar to At3g52570: unknown protein	chr1.CM0668.32_s_at	-0.287151	0.524528
Lotus japonicus similar to At5g59010: protein kinase - like	chr1.CM0668.44.2_x_at	0.0307613	0.909132
Lotus japonicus similar to At4g32650: potassium channel protein AtKC	chr1.CM0760.1_at	-0.0357698	0.699147
Lotus japonicus similar to At1g06620: oxidoreductase-like protein	TM0906.1.1_at	1.57972	0.0458859
Lotus japonicus similar to At4g32600: unknown protein	chr1.CM0760.14_at	0.590196	0.0735491
Lotus japonicus similar to At5g11430: putative protein	chr1.CM0760.16_at	0.122214	0.66498
Lotus japonicus similar to At3g24350: syntaxin-like protein	chr1.CM0760.22_at	0.243804	0.629568
Lotus japonicus similar to At2g25670: unknown protein	chr1.CM0760.23_at	-0.219246	0.243407
Lotus japonicus similar to At4g14880: cytosolic O-acetylserine(thiol)lyase (EC 4.2.99.8)	BM1702.1_at	1.57897	0.000160796
Lotus japonicus similar to At5g40780: amino acid permease	chr1.CM0064.8_at	1.57859	0.00214249
Lotus japonicus similar to At5g25510: AtB gamma - like protein	chr1.CM0760.34_at	-0.822161	0.0736562
Lotus japonicus similar to At2g25660: unknown protein	chr1.CM0760.36.2_at	0.147735	0.363098
Lotus japonicus similar to Q39878: (Q39878) MITOTIC CYCLIN A2-TYPE	chr1.CM0760.36.3_at	-2.05828	0.0638983
Lotus japonicus similar to At2g25660: unknown protein	chr1.CM0760.36_at	-0.0388632	0.968901
Lotus japonicus similar to At5g33360: putative protein	chr1.CM0760.4_s_at	0.667555	0.204755
BP067812 Lotus corniculatus var. japonicus nodulating root Lotus corniculatus var. japonicus cDNA clone GNf006e03 3 , mRNA sequence reverse complement	gi45624556_at	1.57846	0.0399947
Lotus japonicus similar to At1g60560: unknown protein	chr1.CM0760.7_at	0.0418315	0.672216
AV768447 Lotus japonicus Young plants (two-weeks old) Lotus corniculatus var. japonicus cDNA clone MWM243f03_f 3 , mRNA sequence reverse complement	gi45351719_at	1.57648	0.00346631
Lotus japonicus similar to At5g11460: unknown protein	chr1.CM0760.9_at	-0.0022851	0.999999
Lotus japonicus similar to At4g27680: unknown protein	chr1.CM0794.16_at	-0.113102	0.502259
Lotus japonicus similar to O48618: (O48618) CYTOCHOME B5 (FRAGMENT)	chr1.CM0794.19_at	-0.0229305	0.977675
Lotus japonicus similar to At5g53550: EspB-like protein	chr1.CM0794.22.1_at	0.542989	0.123818
Lotus japonicus similar to At5g53550: EspB-like protein	chr1.CM0794.22_at	0.284029	0.618881
Lotus japonicus similar to At2g46620: unknown protein	chr1.CM0794.30_at	0.234662	0.876235
Lotus japonicus similar to At5g18130: unknown protein	chr1.TM0371.24_at	1.57461	0.00067648
Lotus japonicus similar to At2g26770: unknown protein	chr1.CM0794.48_at	0.350988	0.325829
Lotus japonicus similar to At2g26770: unknown protein	chr1.CM0794.48_x_at	-0.0168751	0.971232
Lotus japonicus similar to At3g49320: unknown protein	chr1.CM0794.50.1_at	0.00396986	0.999999
Lotus japonicus similar to At4g27700: unknown protein	chr1.CM0794.50.2_at	-0.329621	0.229531
Lotus japonicus similar to At5g41970: GAMM1 protein-like	chr1.CM0794.50_at	0.0156503	0.98546
Lotus japonicus hypothetical protein	chr1.CM0794.54_x_at	-0.0988706	0.695724
Lotus japonicus similar to At5g52450: unknown protein	Ljwgs_119353.1_at	1.5703	0.0175566
Lotus japonicus similar to At3g19970: unknown protein	chr1.CM0794.64_at	-0.00121852	0.999999
Lotus japonicus similar to At4g27680: unknown protein	chr1.CM0794.7_at	-0.235758	0.510913
Lotus japonicus similar to At5g62230: unknown protein	chr1.CM0794.8_at	-0.00156044	0.999999
Lotus japonicus similar to At3g24200: monooxygenase, putatve	chr1.CM0800.11_at	-0.0936335	0.78728
Lotus japonicus similar to Q08145: (Q08145) GTP-BINDING PROTEIN 1	chr1.CM0800.12_at	-0.87529	0.095782
Lotus japonicus similar to Q9ZNS1: (Q9ZNS1) 40S RIBOSOME PROTEIN S7	chr1.CM0800.14.1_at	0.0980553	0.372775
Lotus japonicus similar to Q9FR01: (Q9FR01) AVR9 CF-9 RAPIDLY ELICITED PROTEIN 4	chr1.CM0800.14_at	0.572428	0.385962
Lotus japonicus similar to At1g74600: hypothetical protein	chr1.CM0800.16_at	-0.0668416	0.950619
Lotus japonicus similar to At3g07360: unknown protein	chr1.CM0800.19_at	0.801706	0.119138
Lotus japonicus similar to Q9CE49: (Q9CE49) HYPOTHETICAL PROTEIN YUHI	chr1.CM0800.2.1_at	-0.406911	0.151865
Lotus japonicus similar to At1g48830: unknown protein	chr1.CM0800.20_at	0.780613	0.121272
Lotus japonicus similar to At3g42100: putative protein	chr1.CM0800.23.1_x_at	0.00178317	0.999999
Lotus japonicus similar to At4g18100: ribosomal protein L32 -like protein	chr1.CM0800.23_at	-0.391134	0.473394
Lotus japonicus similar to At3g25290: unknown protein	chr1.CM0800.24_at	-0.324335	0.323161
Lotus japonicus similar to At4g12970: putative protein	chr1.CM0800.27.1_at	-0.0446457	0.953923
Lotus japonicus similar to At5g48540: 33 kDa secretory protein-like	chr1.CM0800.27_at	-0.41002	0.680219
Lotus japonicus similar to At5g48480: unknown protein	chr1.CM0800.31_at	-2.39388	0.136763
Lotus japonicus similar to At2g26470: unknown protein	chr1.CM0800.35_at	0.0766412	0.916479
Lotus japonicus hypothetical protein	chr1.CM0800.38_at	-0.0052936	0.997613
Lotus japonicus similar to At2g26470: unknown protein	chr1.CM0800.39_at	0.0939327	0.916186
Lotus japonicus similar to At5g48500: unknown protein	chr1.CM0800.41_at	-0.111318	0.307108
Lotus japonicus similar to At3g25400: unknown protein	chr1.CM0800.42.1_at	-0.680583	0.270672
Lotus japonicus similar to At5g48485: unknown protein	chr1.CM0800.42_at	-3.02133	0.156753
Lotus japonicus similar to At5g59970: histone H4 - like protein	chr1.CM0800.47_at	-2.55362	0.0513482
Lotus japonicus similar to At4g36710: SCARECROW-like protein	Ljwgs_023918.1_at	1.56187	0.0355747
Lotus japonicus similar to At4g35070: unknown protein	chr1.CM0017.30_at	1.55807	0.00225672
Lotus japonicus similar to At3g07470: unknown protein	chr1.CM0800.54_at	0.157522	0.764794
Lotus japonicus similar to At5g10360: 40S ribsomal protein S6	chr1.CM0800.57.1_at	-0.390291	0.561722
Lotus japonicus hypothetical protein	Ljwgs_108455.1_at	1.55443	0.00337582
Lotus japonicus similar to At3g30560: hypothetical protein	chr1.CM0800.61_x_at	-0.00643757	0.999817
Lotus japonicus similar to At3g25430: unknown protein	chr1.CM0800.62_at	0.268438	0.695839
Lotus japonicus similar to Q9LV69: (Q9LV69) GENOMIC DNA, CHROMOSOME 5, P1 CLONE:MJE7	chr1.CM0800.63_at	-0.146947	0.729216
Lotus japonicus similar to At3g07480: Unknown protein (F21O3.19)	chr1.CM0800.64.1_at	-0.180831	0.295092
Lotus japonicus similar to At3g07510: unknown protein	chr1.CM0800.66_at	-0.224246	0.283896
Lotus japonicus similar to At4g12850: putative protein	chr1.CM0800.67_at	0.404422	0.236281
Lotus japonicus similar to At5g15170: unknown protein	chr1.CM0800.69_at	-0.11558	0.845635
Lotus japonicus hypothetical protein	chr1.CM0800.7.1_at	-0.068998	0.766703
Lotus japonicus similar to At5g60870: UVB-resistance protein UVR8 - like	chr1.CM0800.72_at	0.185139	0.636663
Lotus japonicus similar to At4g05210: putative protein	chr1.CM0800.76.1_at	0.0157327	0.960013
Lotus japonicus similar to At1g35940: hypothetical protein	chr1.CM0800.8.1_x_at	0.0209486	0.943004
Lotus japonicus similar to At5g08710: unknown protein	chr1.CM0955.11_at	0.214929	0.55264
Lotus japonicus hypothetical protein	chr1.CM0955.14.1_at	0.00845684	0.983624
Lotus japonicus hypothetical protein	chr1.CM0955.14.1_x_at	0.00223181	0.999999
Lotus japonicus similar to At3g45750: unknown protein	chr1.CM0955.14_at	0.0545145	0.95216
Lotus japonicus similar to At3g45750: unknown protein	chr1.CM0955.17_at	-0.109098	0.564396
Lotus japonicus similar to At1g80500: unknown protein	chr1.CM0955.18_at	-0.253232	0.49853
Lotus japonicus similar to At3g52950: unknown protein	chr1.CM0955.20_at	-0.318965	0.524528
Lotus japonicus similar to At5g28050: putative cytidine deaminase - like	Ljwgs_059324.0.1_at	1.55438	0.0141632
Lotus japonicus similar to At3g45750: unknown protein	chr1.CM0955.3.2_at	0.383628	0.303833
Lotus japonicus similar to At3g45750: unknown protein	chr1.CM0955.4_at	0.399574	0.48449
Lotus japonicus similar to At4g38180: unknown protein (At4g38180)	chr1.CM0955.6_at	0.0423546	0.89271
Lotus japonicus similar to At2g01820: putative receptor-like protein kinase	chr1.CM0980.14.1_at	-0.0543367	0.938357
Lotus japonicus similar to At3g09180: unknown protein	chr1.CM0980.15_at	0.190006	0.419674
Lotus japonicus similar to At2g35980: similar to harpin-induced protein hin1 from tobacco	chr1.CM0980.20_at	1.31996	0.527717
Lotus japonicus similar to At2g35980: similar to harpin-induced protein hin1 from tobacco	chr1.CM0980.21_at	0.736528	0.833463
Lotus japonicus similar to At5g06320: NDR1 HIN1-like protein 3 (NHL3)	chr1.CM0980.22_at	1.16952	0.239222
Lotus japonicus similar to At3g11660: unknown protein	chr1.CM0980.23_at	-0.0861107	0.983116
Lotus japonicus similar to At3g13580: putative ribosomal protein	chr1.CM0980.30.1_at	0.124928	0.972402
Lotus japonicus similar to At5g53040: putative protein	chr1.CM0980.5.1_at	0.0217142	0.888047
Lotus japonicus similar to At3g09180: unknown protein	chr1.CM0980.5.2_at	0.308996	0.510169
Lotus japonicus similar to At3g11670: digalactosyldiacylglycerol synthase	chr1.CM0980.5_s_at	0.0579729	0.915725
Lotus japonicus similar to At5g06350: putative protein	chr1.CM0980.6.1_at	0.037426	0.923505
Lotus japonicus similar to At5g27010: putative protein	chr1.CM0980.6.2_at	0.140886	0.631398
Lotus japonicus similar to At4g31400: unknown protein	chr1.CM0980.9_at	-0.519503	0.179072
Lotus japonicus similar to At4g13340: extensin-like protein	chr1.CM0982.10_at	0.00301416	0.999245
Lotus japonicus similar to At5g49700: putative protein	chr1.CM0982.11.1_at	-0.253351	0.690416
Lotus japonicus similar to At5g49700: putative protein	chr1.CM0982.11_at	-0.598502	0.562417
Lotus japonicus similar to At1g09730: unknown protein	chr1.CM0982.14_at	0.0898966	0.836421
Lotus japonicus similar to At4g24560: putative protein	chr1.CM0982.17.1_at	0.119471	0.90303
Lotus japonicus similar to At2g23000: putative serine carboxypeptidase I	chr1.CM0982.23_at	0.143679	0.673263
Lotus japonicus similar to At4g33620: putative protein	chr1.CM0982.25_at	0.366764	0.581157
Lotus japonicus similar to At4g24620: glucose-6-phosphate isomerase	chr1.CM0982.29.1_at	0.104888	0.528021
Lotus japonicus similar to At2g22500: putative mitochondrial dicarboxylate carrier protein	chr1.CM0982.31_at	2.2772	0.227285
Lotus japonicus hypothetical protein	chr1.CM0982.32.2_at	-0.0512048	0.998868
Lotus japonicus similar to At1g69440: hypothetical protein	chr1.CM0982.35.1_at	-0.00334607	0.997662
Lotus japonicus similar to At1g31290: hypothetical protein	chr1.CM0982.36.1_s_at	-0.00316164	0.997913
Lotus japonicus similar to At5g65430: GF14 Kappa isoform	chr1.CM0982.38.1_at	-0.0878365	0.657068
Lotus japonicus similar to At2g33740: truncated copper-binding protein CUTA (CUTA)	chr1.CM0982.38_at	0.504801	0.226154
Lotus japonicus similar to At4g24620: glucose-6-phosphate isomerase	chr1.CM0982.39_at	-0.146824	0.302651
Lotus japonicus similar to Q9FXL2: (Q9FXL2) VF14-3-3C PROTEIN	chr1.CM0982.42.1_at	-0.163364	0.510438
Lotus japonicus hypothetical protein	chr1.CM0982.43_at	-0.00512219	0.990798
Lotus japonicus similar to At3g27870: P-type ATPase, putative	chr2.CM0201.13_at	1.5533	0.00403816
Lotus japonicus similar to At1g05280: hypothetical protein	chr3.CM0152.32_at	1.55274	0.0398927
Lotus japonicus similar to At4g24560: putative protein	chr1.CM0982.8.1_at	-0.0137587	0.995749
Lotus japonicus similar to At4g24560: putative protein	chr1.CM0982.8.2_at	0.134875	0.484915
Lotus japonicus similar to At4g24560: putative protein	chr1.CM0982.8_at	-0.0192953	0.999848
Lotus japonicus similar to At2g38660: methylenetetrahydrofolate dehydrogenase	Ljwgs_051220.1_at	1.55037	0.0128604
Lotus japonicus similar to At5g51600: putative protein	chr1.CM1255.10_at	0.0311771	0.883059
Lotus japonicus similar to At1g19260: hypothetical protein	chr1.CM1255.11_s_at	0.00976706	0.991132
Lotus japonicus similar to At4g12080: putative DNA-binding protein	chr1.CM1255.13_at	-1.07788	0.502928
Lotus japonicus similar to At1g12390: unknown protein	chr1.CM1255.15_at	0.138959	0.811333
Lotus japonicus similar to At3g60810: unknown protein	chr1.CM1255.20_at	-0.0105075	0.982079
Lotus japonicus similar to At4g00090: putative WD repeat membrane protein	chr1.CM1255.27_at	-0.220859	0.273061
Lotus japonicus similar to Q40316: (Q40316) VESTITONE REDUCTASE	chr1.CM1255.28.1_at	0.0177954	0.949927
Lotus japonicus similar to Q40316: (Q40316) VESTITONE REDUCTASE	chr1.CM1255.30_at	1.29335	0.0721034
Lotus japonicus similar to Q40316: (Q40316) VESTITONE REDUCTASE	chr1.CM1255.32_at	0.385969	0.462177
Lotus japonicus similar to At2g38650: unknown protein	chr1.CM1255.42_at	-0.231304	0.244198
Lotus japonicus similar to At3g54220: SCARECROW1	chr1.CM1255.46_at	-0.534713	0.491452
Lotus japonicus similar to At2g38670: putative phospholipid cytidylyltransferase	chr1.CM1255.48_at	-0.140617	0.719542
Lotus japonicus similar to At5g01020: protein kinase -like protein	chr1.CM1255.49_at	-0.240478	0.514917
Lotus japonicus similar to At4g00210: putative protein	chr1.CM1255.9_at	-0.00458729	0.994279
Lotus japonicus similar to At5g42740: glucose-6-phosphate isomerase, cytosolic (GPI) (phosphoglucose isomerase) (PGI) (phosphohexose isomerase) (PHI) (sp|P34795)	chr1.CM1409.1_at	0.00943443	0.966016
Lotus japonicus similar to At4g24380: unknown protein	chr1.CM1409.12_at	0.147259	0.779928
[truncated: 31,925 more rows]
